# Supplementary material for: Elevated blood urea nitrogen is associated with recurrence of post-operative chronic subdural hematoma
Source: BMC Neurol. 2020 Nov 10;20:411. doi: 10.1186/s12883-020-01985-w (PMC7653870; doi:10.1186/s12883-020-01985-w)
Supplement: Supplementary file 2 — Additional file 2. The complete data used and analysed during the current study. [file 12883_2020_1985_MOESM2_ESM.xlsx]

## Sheet: Sheet1
number	gender	age	admission date	discharge date	hospital time	disease course（day）	trauma	smoke	drink	hypertension	diabetes	heart disease	hematoma location	SBP（mmHg）	DBP（mmHg）	Leukocyte (X10^9)	neutrophil（X10^9)	lymphocyte	erythrocyte	hemoglobin	platelet	prothrombin time	INR	fibrinogen	APTT	thrombin time	D-dimer	Tbil	direct bilirubin	indirect bilirubin	albumin	ALT	AST	glucose	BUN	Cr	atorvastatin	PAMBA	surgery	recurrence	bleeding	postop BUN quartile	BUN/Cr(%)	preop BUN	GOS at discharge	volume	neutrophil rate	preop BUN quartile
1	1	54	2018-05-18 08:29:46	2018-06-01 10:46:23	14.0949	7	1	1	1	0	0	0	0	133	84	6.09	3.16	1.81	3.58	125	453	12.4	0.94	6.08	40.1	16.2	0.74	15	8	7	35.2	16	39	7.4	1	45	1	1	1	0	0	1	2.22222	4.2	5	60	0.518	1
3	1	39	2018-09-25 06:19:03	2018-10-03 10:33:08	8.17645	1	1	1	1	0	0	0	0	132	85	12.1	11.1	0.63	3.99	128	223	13.9	1.07	3.81	32.5	15.7	0.26	14	5	9	36.1	17	18	5.1	1.6	52	0	0	1	0	1	1	3.07692	3.2	5	100	0.917	1
2	1	55	2018-11-04 18:21:28	2018-11-20 13:23:56	15.7934	30	1	0	0	0	0	0	2	134	84	6.17	4.62	1.15	5.12	160	169	13.6	1.04	3.15	37.7	15.7	0.23	16	7	9	35.3	11	24	5.7	1.6	65	1	0	1	0	1	1	2.46154	6.8	5	80	0.749	4
4	1	79	2018-02-19 16:22:19	2018-02-24 13:40:42	4.88777	2	1	1	1	1	0	0	2	158	78	5.71	4.43	0.65	3.11	85	286	13.8	1.07	5.13	46.2	15.1	0.35	14	7	7	31.9	7	21	5.4	1.7	58	0	0	1	0	0	1	2.93103	1.7	5	220	0.776	1
5	0	66	2017-05-10 11:17:10	2017-05-18 12:05:37	8.03365	10	1	0	0	1	1	1	1	122	69	6.7	5.13	0.83	2.89	94	237	14.8	1.15	5.34	37.1	16.6		14	10	4	37.7	13	25	6.1	1.9	33	1	0	1	0	0	1	5.75758	9.8	5	40	0.766	4
7	0	49	2017-06-15 16:50:01	2017-06-28 10:25:16	12.7328	7	0	0	0	0	0	0	0	131	91	8.18	5.93	1.75	4.93	91	433	14.2	1.1	3.46	38.4	15.4		9	3	6	43.9	32	23	5.6	2	35	0	0	1	0	0	1	5.71429	2	5	80	0.725	1
6	0	68	2018-03-05 15:13:36	2018-03-16 10:39:45	10.8098	21	0	0	0	1	0	1	0	185	90	4.98	3.49	1.15	4.31	130	218	13.6	1.06	4.3	41.1	16.7	1.16	9	4	5	41.1	10	17	4.6	2	43	1	0	1	0	0	1	4.65116	2.3	5	120	0.701	1
8	0	64	2017-06-05 15:18:12	2017-06-19 10:03:28	13.7814	5	0	0	0	0	0	0	1	163	79	9.03	6.93	1.31	4.6	124	364	13.2	1	6.55	33.7	16.4		5	2	3	25.7	12	13	5.7	2	38	1	0	1	0	0	1	5.26316	4.6	5	80	0.768	2
10	0	61	2016-08-22 23:34:48	2016-09-06 10:47:50	14.4674	60	1	0	0	0	0	0	0	139	74	5.79	4.5	0.8	4.05	116	109	13.2	0.98	2.33		15.8		6	3	3	36.4	10	17	5.3	2.2	62	1	1	1	0	0	1	3.54839	2.5	5	100	0.784	1
9	0	62	2017-07-08 19:11:19	2017-07-15 10:05:59	6.6213	2	0	1	0	1	1	0	2	122	77	5.72	3.74	1.6	4.51	145	195	12.7	0.95	3.94	38.8	17.6								6.4	2.2	42	1	0	1	0	0	1	5.2381	4.1	5	140	0.653	1
12	1	77	2017-03-30 14:56:45	2017-04-12 10:45:57	12.8258	10	0	1	1	0	0	0	1	124	72	6.52	4.78	1.28	4.24	144	214	12.4	0.92	3.41	33.3	14.6	1.24	26	10	16	31.7	12	15	4.5	2.3	55	1	0	1	0	0	1	4.18182	2.4	5	100	0.733	1
13	1	68	2017-03-14 18:03:45	2017-03-28 10:41:55	13.6932	7	0	1	1	0	0	0	0	120	76	8.43	5.58	1.89	3.46	120	459	13	0.98	8.32	47.5	114		7	3	4	30.6	6	16	3.5	2.3	68	1	0	1	0	0	1	3.38235	2.9	5	100	0.662	1
11	1	67	2018-04-08 16:25:27	2018-05-04 10:59:08	25.7734	1	0	1	1	0	0	0	0	108	65	8.89	7.81	0.65	4.16	150	247	12.6	0.96	3.05	32.8	16.1	0.8	20	8	12	37.1	18	17	4.9	2.3	56	1	1	1	0	1	1	4.10714	3	5	100	0.879	1
14	1	82	2018-03-10 16:07:34	2018-03-20 10:28:13	9.76434	7	1	0	0	0	0	0	0	133	66	7.09	5.44	1.22	4.16	138	161	14.1	1.11	4.01	40.2	15.7	0.4	12	5	7	36.7	12	14	5.4	2.4	53	1	0	1	0	0	1	4.5283	3.4	5	120	0.768	1
15	1	51	2019-02-23 17:47:28	2019-03-21 10:41:47	25.7044	4	1	0	0	1	1	0	0	134	72	7.47	5.31	1.56	3.78	117	231	12.8	0.99	3.36		16.3	0.17	5	2	3	39.8	28	25	5.7	2.5	65	1	0	1	0	1	1	3.84615	2.7	5	60	0.711	1
16	1	63	2017-12-24 18:07:30	2018-01-04 13:41:30	10.8153	2	1	1	1	1	1	0	0	191	105	6.34	4.33	1.64	4.52	140	136	14.2	1.12	3.29	43.4	17.9	0.71	9	5	4	34.1	21	23	13.6	2.5	49	0	1	1	0	1	1	5.10204	3	5	150	0.682	1
18	1	80	2017-02-25 10:43:27	2017-03-08 09:28:46	10.9481	7	0	0	0	0	0	0	1	159	68	4.09	1.88	1.64	3.82	114	250	14.1	1.09	5.94	44.9	14.1		11	5	6	33.4	12	21	6.2	2.6	42	1	0	1	0	0	1	6.19048	2.6	4	100	0.46	1
20	0	80	2016-10-11 14:46:34	2016-10-19 13:58:54	7.9669	4	1	0	0	0	0	0	0	145	85	5.18	3.74	1.09	4.06	119	237	13.7	1.03	3.6	38.1	15.7		13	5	8	34.7	10	19	3.9	2.6	59	1	0	1	0	0	1	4.40678	3.3	4	80	0.723	1
19	1	67	2016-10-21 10:01:56	2016-10-28 10:48:21	7.03223	12	1	1	1	0	0	1	1	142	98	4.81	1.94	2.06	3.71	141	183	14.6	1.14	1.75	34.7	21.3		15	9	6	39.8	19	29	3.5	2.6	52	0	0	1	0	1	1	5	3.5	5	100	0.404	1
17	1	71	2017-12-16 15:14:56	2017-12-29 11:07:22	12.8281	3	1	0	1	1	0	0	0	167	88	6.72	4.88	1.38	4.08	134	236	12.3	0.93	4.29	35.5	16.1	0.38	11	4	7	38.2	13	17	7.1	2.6	82	1	1	1	0	1	1	3.17073		5	150	0.727
23	1	45	2015-09-11 10:18:35	2015-09-22 09:54:14	10.9831	5	1	1	0	0	0	0	2	138	81	5.33	4.3	0.8	4.71	150	74	14.3	1.1	2.32		16.2		57	19	38	44.2	20	20	4.7	2.7	65	1	0	1	0	0	1	4.15385	2.7	5	100	0.816	1
22	1	59	2016-03-16 01:11:31	2016-03-23 10:41:58	7.39615	15	0	1	0	0	0	0	0	115	73	9.67	8.6	0.6	4.9	143	295	13.2	1.04	4.53		15.2		8	3	5	41	20	24	5.5	2.7	53	1	0	1	0	0	1	5.09434	3.5	5	60	0.892	1
21	1	53	2017-10-03 17:23:15	2017-10-15 13:42:14	11.8465	10	1	0	0	0	0	0	1	134	84	7.66	4.27	2.67	4.75	141	255	11.5	0.85	3.21	33.8	16	0.35	5	2	3	39.3	10	15	5.6	2.7	79	1	0	1	0	0	1	3.41772	4.4	5	80	0.557	1
25	1	56	2018-07-19 13:11:42	2018-07-31 16:05:18	12.1206	40	1	0	1	0	0	0	1	142	83	7.48	6.27	0.65	3.99	111	67	16.6	1.38	2.74	44.5	16.8	0.6	15	9	6	30.8	26	49	2.8	2.8	64	1	0	1	0	0	1	4.375	1.9	5	80	0.838	1
26	1	76	2018-07-13 10:00:43	2018-07-22 10:37:45	9.02572	30	1	0	0	0	0	0	0	139	71	8.11	6.42	0.99	4.02	115	197	13.2	1.03	3.98	41.8	15.3	0.79					13		5.9	2.8	63	1	0	1	0	0	1	4.44444	2.8	5	120	0.792	1
29	0	78	2015-06-30 14:28:18	2015-07-20 09:57:48	19.8122	7	1	0	0	0	0	0	1	137	66	9.18	5.96	1.54	3.53	99	126	13.8	1.05	4.36		17.7	20	7	4	3	24.5	21	28	4.4	2.8	53	1	0	1	0	1	1	5.28302	2.8	5	80	0.649	1
30	1	44	2015-04-18 12:35:41	2015-04-27 10:46:09	8.92394	1	1	1	1	0	0	0	0	111	52	8.31	6.5	1.4	4.43	143	291	13.2	0.98	2.67		16.7								5.6	2.8	60	0	0	1	0	0	1	4.66667	2.8	5	80	0.786	1
31	1	82	2017-01-16 17:57:19	2017-02-04 13:47:23	18.8264	7	0	0	0	1	1	1	2	131	83	6.79	3.88	2.22	3.82	119	173	15.6	1.24	4.65	37.6	16.1		13	6	7	37.5	12	18	6.5	2.8	65	1	0	1	1	0	1	4.30769	2.8	4	180	0.572	1
24	0	84	2018-10-15 21:24:10	2018-11-09 11:24:04	24.5833	4	0	0	0	0	0	0	0	135	56	4.09	2.4	1.06	3.19	94	211	13.7	1.05	5.01	39.7	16.2	1.45	11	5	6	23.1	18	40	9.5	2.8	64	1	1	1	0	0	1	4.375	3	5	80	0.587	1
33	1	77	2016-04-07 16:34:37	2016-05-05 10:21:02	27.7406	3	1	0	0	0	0	0	0	180	100	5.85	4.3	1.1	3.47	111	198	13.6	1.02	2.9	38.2	16.4		9	3	6	37.2	15	24	8.1	2.8	59	0	0	1	1	0	1	4.74576	3.5	5	80	0.735	1
28	1	76	2015-12-22 19:14:42	2016-01-07 13:19:31	15.7533	1	1	0	0	0	0	0	2	102	68	9.7	7.8	1.2	4.37	128	293	13	0.97	5.54	33.2	16	1.53	13	4	9	28.8	18	32	7	2.8	75	1	0	1	0	0	1	3.73333	4.3	5	150	0.806	1
27	1	73	2017-11-03 11:23:06	2017-11-09 10:40:39	5.97052	30	1	0	0	1	0	0	1	134	84	8.49	6.45	0.115	4.14	128	229	12.3	0.92	4.67	37	15.1	1.2	6	3	3	34.4	11	13	5.4	2.8	80	1	1	1	0	0	1	3.5	4.8	5	100	0.76	2
32	1	77	2016-12-11 13:05:32	2016-12-20 13:41:21	9.02487	7	1	0	0	0	0	0	2	171	73	7.82	4.96	1.98	5.29	117	314	13.2	1	4.02	35.6	17		11	4	7	32.4	22	24	3.9	2.8	61	1	1	1	1	0	1	4.59016	6.3	5	70	0.634	3
39	1	65	2015-09-07 10:48:24	2015-09-29 10:12:22	21.975	1	0	0	0	0	0	0	2	133	76	9.31	6	2.4	3.65	116	171	13.2	0.99	2.87		16.6	0.74	16	7	9	31.8	12	20	5.6	2.9	58	1	1	1	0	0	1	5	2.7	5	180	0.641	1
38	1	68	2015-10-02 23:36:28	2015-10-15 10:08:13	12.4387	5	0	1	1	0	0	0	1	145	88	9.15	7.42	0.9	4.38	140	180	13.1	0.98	3.39		15.7		10	4	6	36.1	13	19	3.9	2.9	57	1	0	1	0	0	1	5.08772	3.3	5	100	0.811	1
41	1	37	2015-06-08 12:59:21	2015-06-17 09:44:37	8.86477	4	1	1	1	0	0	0	2	140	88	8.34	6.3	1.6	4.1	125	225	12.7	0.94	3.58		15.3		11	4	7	38.6	21	19	3.8	2.9	64	0	1	1	0	1	1	4.53125	3.3	5	110	0.751	1
37	1	70	2016-04-24 19:49:44	2016-05-05 08:53:20	10.5442	120	1	0	0	0	0	0	2	151	80	9.29	6.7	1.7	4.66	139	209	11.5	0.85	3.15		16.2		11	3	8	35.6	11	23	7.9	2.9	55	1	0	1	0	0	1	5.27273	3.4	5	80	0.716	1
40	1	66	2015-07-21 11:54:17	2015-08-03 11:28:40	12.9822	2	1	1	1	1	0	0	2	122	67	6.95	5.3	1.1	4.28	126	145	14.9	1.16	3.51		15.8		21	9	12	37.9	8	14	4.8	2.9	62	1	0	1	0	0	1	4.67742	3.4	5	100	0.762	1
35	0	82	2018-08-17 18:51:01	2018-08-28 10:04:09	10.6341	4	1	0	0	1	0	0	1	129	78	7.3	6.44	0.36	3.6	100	250	14.1	1.12	5.42	36.7	13.9	2.36	8	6	2	39.6	8	27	8.4	2.9	49	1	0	1	0	0	1	5.91837	4.5	5	60	0.882	2
34	1	62	2018-12-18 16:48:14	2018-12-27 11:33:18	8.7813	7	0	1	1	1	1	1	0	145	81	5.03	3.76	0.92	4.26	133	213	12.6	0.97	3.63	34.2	14.9	0.26	17	5	12	35.2	16	11	7	2.9	61	1	0	1	0	1	1	4.7541	6.1	5	100	0.747	3
36	1	64	2018-01-09 14:42:59	2018-02-05 11:05:34	26.849	7	0	0	0	1	0	0	0	137	93	6.2	3.74	2.07	3.35	105	242	14.3	1.13	3.75	39.4	14.2	0.65	10	5	5	35	38	26	5.2	2.9	67	1	0	1	0	0	1	4.32836	7.6	5	170	0.603	4
48	1	50	2016-03-02 17:26:24	2016-03-10 10:34:45	7.71413	7	1	1	1	0	0	0	0	134	68	6.25	4.6	1.1	4.37	131	151	12.8	1	3.53	34.5	15.6		10	5	5	36.1	12	23	5	3	52	0	0	1	0	0	1	5.76923	2.6	5	80	0.738	1
44	1	76	2018-04-07 13:55:15	2018-04-13 15:52:04	6.08112	30	0	1	1	0	0	0	0	154	73	6.08	3.5	1.86	4.79	144	302	12.9	0.99	4.99	37.9	15.8	0.66	15	6	9	35.7	10	18	5	3	55	1	0	1	0	0	1	5.45455	2.8	5	90	0.576	1
49	1	44	2015-11-27 10:49:43	2015-11-30 15:18:59	3.18699	20	0	1	1	1	0	0	1	141	97	9.69	6.4	2.6	4.77	150	300	12	0.88	5.3	31.2	15.7		6	2	4	32.3	20	18	4.5	3	73	0	0	1	0	0	1	4.10959	2.8	5	80	0.665	1
43	1	75	2018-07-10 08:03:57	2018-07-18 11:08:34	8.12821	5	0	0	0	0	0	0	2	130	65	2.8	2.14	0.44	3.85	119	117	12.8	0.99	3.55	31.2	15.1	0.72	7	3	4	35.8	13	21	9	3	56	1	0	1	0	1	1	5.35714	3	5	130	0.764	1
46	0	79	2017-08-07 11:30:51	2017-08-19 10:04:52	11.9403	10	0	0	0	0	1	0	1	125	68	7.47	4.56	2.25	4.29	124	318	14.1	1.1	3.54	32.2	17.2	0.44	5	2	3	34.9	46	33	5.5	3	38	1	0	1	0	0	1	7.89474	3	5	90	0.611	1
47	1	74	2016-05-18 14:39:29	2016-06-14 09:38:48	26.7912	10	1	1	1	0	0	0	1	133	74	6.37	4	1.6	3.61	112	198	14.4	1.12	3.69		14.9		17	8	9	33.7	12	32	3.9	3	87	1	0	1	0	0	1	3.44828	3	4	90	0.627	1
51	0	21	2018-08-23 20:53:23	2018-09-13 15:36:38	20.78	15	0	0	0	0	0	0	0	104	67	8.78	5.31	2.72	3.99	122	228	14.1	1.12	2.71	35.8	15.5	0.18	13	6	7	40	28	27	7.3	3	53	1	0	1	1	0	1	5.66038	3	5	80	0.605	1
42	1	80	2018-07-25 16:37:56	2018-08-06 12:43:54	11.8375	60	0	0	0	1	1	0	1	141	80	6.01	2.68	2.32	4.37	143	111	13.7	1.08	3.86	36	16.9	0.41	5	2	3	32.2	21	23	4.3	3	74	0	1	1	0	0	1	4.05405	4	5	60	0.445	1
45	1	67	2018-02-17 12:16:43	2018-02-20 13:55:03	3.06829	4	1	0	0	0	0	0	0	153	95	6.12	4.86	0.69	4.87	154	233	12.3	0.93	3.9	33.3	16	1.22	11	4	7	36.4	9	18	6.2	3	81	1	1	1	0	0	1	3.7037	5.9	5	100	0.794	3
50	1	79	2015-04-18 16:00:13	2015-04-28 09:21:25	9.72306	2	0	0	0	0	0	0	0	115	65	6.91	0.744	5.1	3.85	120	130	14.1	1.07	3.1		17.4		10	4	6	35.3	34	37	4.8	3	59	0	0	1	0	1	1	5.08475	7.2	5	90		4
52	1	68	2018-08-03 06:51:37	2018-08-08 08:51:56	5.08355	10	0	0	0	0	0	0	1	133	81	3.79	2.35	0.85	4.13	129	200	13.5	1.06	3.03	37.7	15.9	0.32	15	6	9	37.7	34	24	6.3	3.1	51	1	1	1	0	0	1	6.07843	2.5	5	80	0.62	1
59	1	45	2016-10-04 17:47:28	2016-10-09 09:58:30	4.67433	10	0	0	1	0	0	0	1	122	80	7.91	5.71	1.71	4.48	150	197	13.2	0.98	2.98	29.4	16.5								4.8	3.1	58	1	0	1	0	1	1	5.34483	3.1	5	50	0.722	1
53	1	51	2017-10-11 16:37:34	2017-10-20 10:34:36	8.74794	30	1	0	1	0	0	0	0	153	93	8.7	7.14	1.14	4.8	140	268	12.7	0.96	2.74	34.4	17.6	0.27	9	3	6	42.6	23	28	4.7	3.1	65	1	0	1	0	1	1	4.76923	3.6	5	100	0.821	1
58	0	53	2016-10-16 23:49:43	2016-10-26 10:04:41	9.42706	4	1	0	0	0	0	0	0	146	74	7.42	6.29	0.77	3.62	113	252	13.1	0.99	3.23	31.4	16.1		13	5	8	34.5	6	11	4.7	3.1	38	1	1	1	0	0	1	8.15789	3.7	5	100	0.847	1
60	0	78	2016-09-27 20:25:42	2016-10-13 11:20:34	15.6214	7	0	0	0	1	0	0	1	126	54	6.68	4.67	1.61	3.9	131	221	12.9	0.95	3.43		15.4		8	3	5	38.6	21	28	7.3	3.1	39	0	0	1	0	0	1	7.94872	3.7	5	70	0.7	1
57	1	63	2017-04-15 16:08:55	2017-04-27 10:17:50	11.7562	20	1	0	0	1	0	0	2	125	76	7.88	6.36	1.12	4.55	134	224	13	0.98	3.18	38.1	16.1		15	6	9	42	16	17	5	3.1	59	1	0	1	0	1	1	5.25424	3.9	5	130	0.808	1
61	1	70	2018-07-16 19:48:57	2018-07-26 11:03:05	9.63481	30	1	0	1	0	0	0	1	151	88	6.02	3.7	1.73	4.52	143	151	12.6	0.97	3.44	33	15.6	0.36	20	9	11	33.9	33	25	5	3.1	70	1	0	1	1	1	1	4.42857	4.1	5	80	0.615	1
55	1	62	2017-06-13 16:11:57	2017-06-23 14:41:44	9.93735	3	1	1	0	1	0	0	0	143	86	7.44	4.62	2	4.55	141	262	12.7	0.95	3.48	34.3	16		13	4	9	38.7	15	16	2.9	3.1	69	1	0	1	0	0	1	4.49275	4.3	5	80	0.621	1
54	1	83	2017-09-09 09:03:52	2017-09-16 09:59:29	7.03862	2	1	1	0	1	0	1	2	153	75	9.33	6.35	1.74	3.44	107	264	13.8	1.07	4.73	33.3	14.2	1.5	22	11	11	37.5	29	56	6.5	3.1	68	1	1	1	0	1	1	4.55882	4.5	4	100	0.681	2
56	1	80	2017-05-22 14:03:41	2017-05-31 11:09:52	8.87929	2	0	1	1	0	0	0	1	130	70	5.48	3.92	0.95	4.09	137	211	12.6	0.94	3.09	36.4	17.7	0.99	13	5	8	29.3	9	15	8.2	3.1	75	1	0	1	0	1	1	4.13333	4.5	5	100	0.715	2
62	1	56	2018-08-08 18:03:43	2018-08-19 11:10:33	10.7131	10	1	0	0	0	0	0	1	130	87	4.68	2.57	1.66	4.85	150	174	13.4	1.05	2.56	33.9	15.7	0.34	25	8	17	36.1	12	17	5.6	3.2	73	1	1	1	0	0	1	4.38356	3	5	150	0.549	1
63	1	75	2016-11-05 18:12:13	2016-11-15 12:23:02	9.75751	1	1	1	0	0	0	0	0	146	87	6.69	4.45	1.52	4.73	140	265	13.6	1.04	3.84	42.6	15.8		10	5	5	44.7	17	22	5.1	3.2	64	1	0	1	0	0	1	5	3.2	5	100	0.666	1
66	1	72	2016-02-01 10:00:42	2016-02-11 10:23:39	10.0159	2	0	1	0	0	0	0	1	174	80	9.24	7.15	1.21	4.59	145	229	14	1.07	2.65	46.3	17		9	3	6	44.3	16	18	5.8	3.2	80	1	0	1	0	0	1	4	3.2	5	80	0.774	1
68	1	73	2015-09-18 19:24:34	2015-09-30 11:07:18	11.6547	3	1	0	0	0	1	0	2	125	69	14.68	7.8	5.5	4.19	125	220	13.8	1.05	4.4		15		12	5	7	34.7	25	18	8.8	3.2	71	0	0	1	0	0	1	4.50704	3.9	5	90	0.534	1
64	1	87	2016-06-23 16:09:48	2016-07-02 10:02:50	8.74516	90	1	0	0	1	1	0	0	165	92	6.16	3.2	2.4	4.11	122	153	12.9	0.98	4.97		16.2		11	5	6	37.1	22	34	4.2	3.2	77	1	0	1	0	0	1	4.15584	4.4	5	80	0.518	1
65	1	71	2016-04-29 07:29:40	2016-05-06 10:57:45	7.1445	7	0	1	0	0	0	0	1	128	73	7.38	5.2	1.3	4.8	140	221	12.8	0.97	3.26		15.8		12	4	8	39.4	12	19	4.8	3.2	64	0	0	1	0	0	1	5	4.4	5	100	0.701	1
67	1	67	2015-12-26 15:30:26	2016-01-04 09:39:49	8.75652	30	1	0	1	0	0	0	2	95	57	6.52	4.8	1.2	4.13	147	191	13.2	0.99	2.61	32.3	15.8		19	6	13	36.2	12	14	5.6	3.2	54	1	0	1	0	0	1	5.92593	6.1	5	80	0.74	3
78	1	71	2016-10-03 13:55:14	2016-10-14 10:28:07	10.8562	5	1	1	1	1	0	1	0	170	80	6.34	4.14	1.65	4.67	149	159	12.7	0.93	3.17		16		16	5	11	37.9	10	11	9.6	3.3	55	1	0	1	0	1	1	6	2.7	5	80	0.653	1
74	1	57	2017-06-27 11:40:17	2017-07-08 13:20:53	11.0699	20	0	1	1	0	1	0	0	145	79	8.72	6.15	2.15	4.24	132	290	12.9	0.97	3.5	40.1	17		11	5	6	44.9	17	21	5.7	3.3	60	0	0	1	0	0	1	5.5	3.2	5	80	0.705	1
75	1	78	2016-12-09 17:54:05	2016-12-17 15:14:32	7.8892	7	1	0	0	1	0	0	1	157	58	9.59	7.49	1.47	4.71	140	303	15.7	1.25	5.35	42.1	15		9	4	5	39.7	14	24	6.7	3.3	50	1	0	1	0	0	1	6.6	3.2	5	70	0.782	1
72	1	41	2017-09-21 16:11:49	2017-09-25 10:34:45	3.76593	2	1	1	1	0	0	0	1	117	71	6.72	3.79	2.22	4.95	162	135	13.9	1.08	3.29	39	15	1.62	22	9	13	42.7	8	17	4.4	3.3	64	1	0	1	0	0	1	5.15625	3.3	5	100	0.565	1
77	1	67	2016-10-11 15:09:12	2016-10-21 16:28:35	10.0551	180	1	0	0	1	1	0	1	130	79	4.55	2.93	1.22	4.28	114	421	13.4	1.02	4.37	40.4	15.3		5	2	3	35.4	23	22	5.6	3.3	55	1	0	1	0	0	1	6	3.3	5	60	0.644	1
79	1	56	2016-06-14 14:20:08	2016-07-07 13:52:40	22.9809	60	1	0	0	0	0	0	2	126	78	6.91	5.4	1.1	4.72	142	186	13.6	1.05	2.46		16.9	1.78	9	5	4	40.5	31	29	5.1	3.3	51	1	1	1	0	1	1	6.47059	3.5	5	80	0.785	1
70	1	72	2018-04-29 21:12:20	2018-05-07 12:02:36	7.61824	1	1	0	1	0	0	0	1	136	62	14.33	12.52	1.16	4.37	148	239	12.6	0.96	4.07	33.5	15.9	1.45	11	5	6	36.8	21	20	6.1	3.3	69	0	1	1	0	0	1	4.78261	3.7	5	100	0.874	1
69	1	76	2018-08-24 13:40:41	2018-09-04 10:01:19	10.8477	1	0	1	1	0	0	0	1	124	72	10.94	6.67	3.11	4.24	133	501	13	1.01	3.7	36.8	15.1	0.4					16		6.5	3.3	74	0	0	1	0	0	1	4.45946	4.2	5	80	0.61	1
71	1	32	2017-10-20 12:55:13	2017-10-28 12:37:24	7.98763	60	0	1	1	0	0	0	1	130	70	7.79	4.48	2.43	5.04	154	298	12.9	0.98	6.04	35.8	16.6	0.42	12	5	7	40.2	50	26	4.4	3.3	74	1	0	1	0	0	1	4.45946	4.3	5	90	0.576	1
73	1	75	2017-08-22 12:08:02	2017-08-29 10:46:28	6.94336	5	1	1	1	1	0	0	2	173	85	5.14	3.49	0.92	3.55	121	132	13.7	1.06	3.39	30.3	16.4	0.45	14	6	8	37.7	40	48	5.4	3.3	57	1	0	1	0	0	1	5.78947	4.3	5	210	0.679	1
82	0	72	2016-02-15 11:25:15	2016-02-29 10:55:14	13.9792	13	1	0	0	0	0	0	1	107	72	11.09	9.4	1	4.05	112	324	30.7	2.98	6.32	62.6	18.3		11	4	7	30.3	15	23	10.1	3.3	34	0	1	1	0	0	1	9.70588	5.8	5	150	0.845	3
76	1	62	2016-11-24 18:52:38	2016-12-16 10:23:37	21.6465	1	0	0	0	0	0	0	0	166	101	5.97	3.66	1.61	4.36	149	216	13.3	1.01	3.34	36.6	15.7	0.92	20	8	12	33.2	13	25	3.5	3.3	51	0	0	1	0	0	1	6.47059	7.9	5	100	0.613	4
80	1	62	2016-04-28 19:40:14	2016-05-08 11:09:58	9.64565	60	0	1	1	0	0	0	0	151	88	4.96	2.7	1.8	4.28	137	152	13.9	1.08	2.86		16		10	4	6	35.1	26	27	6	3.3	62	1	0	1	0	0	1	5.32258		5	90	0.535
81	1	63	2016-03-15 18:16:47	2016-03-22 12:49:16	6.77256	10	0	1	1	0	0	0	0	143	89	5.89	3.4	1.9	3.66	118	141	12.4	0.96	2.45	35.4	14.6		8	3	5	32.7	19	28	4.7	3.3	53	1	0	1	0	0	1	6.22642		5	100	0.582
86	1	64	2017-08-25 23:10:14	2017-08-31 09:59:34	5.45093	10	1	0	1	1	0	0	1	137	78	7.67	6.23	0.86	3.8	122	162	13	0.99	3.04	39.3	15.8	0.27	16	7	9	40.9	14	28	5.5	3.4	64	0	0	1	0	1	1	5.3125	2.5	5	100	0.812	1
85	1	33	2018-03-11 18:37:54	2018-03-20 10:06:09	8.64462	3	1	1	0	0	0	0	0	109	69	11.34	8.51	2.11	4.93	160	330	13	1	3.16	40.4	16.2	0.29					34		6.6	3.4	68	1	1	1	0	0	1	5	3.4	5	100	0.75	1
87	1	85	2016-09-19 17:00:29	2016-10-03 10:49:08	13.7421	30	0	0	0	1	0	0	1	164	90	9.42	7.09	1.36	4.81	148	247	13.9	1.05	4.98		16.4		11	4	7	40.5	31	38	4.2	3.4	54	1	1	1	0	0	1	6.2963	3.4	5	80	0.753	1
93	1	76	2015-09-12 00:47:54	2015-09-23 10:48:01	11.4167	0.5	1	0	0	1	0	0	0	138	64	6.75	4.52	1.75	4.63	136	170	13.4	1.01	3.07		15.5		21	8	13	38.7	11	17	4.8	3.4	57	1	0	1	0	1	1	5.96491	3.5	5	100	0.67	1
92	1	80	2015-10-22 21:10:57	2015-10-30 11:41:28	7.60453	90	0	1	0	1	0	0	1	177	88	7.46	5	1.7	5.24	146	215	13.9	1.06	3.61	36.5	16.1		12	3	9	40.3	14	17	4.6	3.4	56	1	0	1	0	0	1	6.07143	3.7	5	100	0.666	1
96	1	52	2017-02-18 08:33:08	2017-02-27 12:43:58	9.17419	1	1	1	1	0	0	0	0	138	83	9.35	6.89	1.63	4.85	154	258	14	1.08	3	38.7	17.2		7	3	4	40.7	18	18	5.7	3.4	34	1	0	1	1	0	1	10	4.3	5	80	0.738	1
89	1	65	2016-07-27 19:39:04	2016-08-13 10:37:25	16.6239	30	1	1	1	0	1	0	2	138	68	4.87	3.1	1.2	3.95	126	130	13.2	0.98	3.27		14.4		12	5	7	40.2	30	22	7.7	3.4	68	1	0	1	0	0	1	5	4.5	5	机化	0.643	2
84	1	52	2018-08-14 13:55:01	2018-08-24 11:08:55	9.88465	4	1	0	1	0	0	0	1	131	87	8.17	4.03	3.1	4.84	142	228	12.6	0.97	3.39	32.8	16.5		17	6	11	37	11	19	5	3.4	57	0	0	1	0	1	1	5.96491	4.6	5	70	0.494	2
90	1	64	2016-07-12 10:59:35	2016-07-26 12:41:24	14.0707	15	1	0	0	1	0	0	1	144	91	8.61	5.8	1.9	5.27	167	123	13.7	1.06	2.87		17.2		23	8	15	38.4	30	33	4	3.4	60	1	1	1	0	1	1	5.66667	4.6	5	80	0.677	2
95	1	71	2018-01-09 16:48:46	2018-01-19 13:51:24	9.87683	10	1	1	0	1	0	0	1	169	91	7.82	5.61	1.44	4.56	100	206	13.8	1.08	5.13	37.9	14.6	0.94	15	7	8	32.5	10	16	6	3.4	68	1	0	1	1	0	1	5	4.8	5	100	0.718	2
91	1	68	2016-04-06 16:16:51	2016-04-14 10:29:11	7.75856	60	0	0	0	1	1	0	1	174	90	6.3	4.4	1.3	5.07	157	134	12.2	0.94	3.95		15.6		28	8	20	37.5	19	21	8.5	3.4	64	1	0	1	0	0	1	5.3125	5	5	80	0.697	2
94	1	69	2018-03-18 15:26:58	2018-03-23 12:39:50	4.88394	4	0	1	1	0	0	0	1	171	94	7.07	4.83	1.49	5.03	159	141	13.4	1.04	3.25	31.4	17.1	0.4	19	8	11	39.2	33	22	40.4	3.4	61	1	0	1	1	0	1	5.57377	5	5	80	0.684	2
88	1	63	2016-08-25 12:15:13	2016-09-03 10:40:53	8.93449	5	1	1	0	0	0	0	1	97	44	4.38	3.5	0.6	3.94	117	145	13.6	1.02	2.82		16.3		7	3	4	31.2	14	19	4.7	3.4	64	1	0	1	0	0	1	5.3125	5.3	5	80	0.792	2
83	1	74	2018-12-17 08:33:34	2018-12-27 09:33:32	10.0416	15	1	0	1	0	0	0	0	135	78	5.15	2.93	1.47	4.64	129	227	13.4	1.05	2.8	36.7	17.3		17	6	11	35.5	19	20	5.3	3.4	67	1	1	1	0	0	1	5.07463	5.5	5	60	0.569	3
109	1	43	2015-05-15 20:21:20	2015-05-26 10:43:50	10.599	30	1	1	0	0	0	0	1	134	84	8.39	5.33	2.37	5.58	120	203	14.6	1.11	1.64		17		7	3	4	34.6	23	15	5.7	3.5	78	0	0	1	0	1	1	4.48718	2.6	5	80	0.636	1
104	0	69	2017-07-17 14:01:13	2017-07-23 09:44:55	5.82201	30	1	0	0	0	0	0	2	129	66	7.08	5.16	1.35	4.73	135	296	12.7	0.95	5.83	46	15.2	20	9	3	6	30.6	12	14	7.6	3.5	55	1	1	1	0	0	1	6.36364	3.1	5	70	0.729	1
100	1	60	2018-05-30 09:25:01	2018-06-03 11:11:32	4.07397	7	1	1	0	0	0	0	0	117	84	6.51	4.47	1.5	4.87	154	182	13.7	1.06	2.68	33.6	17.1	0.24	12	4	8	41.1	33	29	4.3	3.5	75	0	0	1	0	0	1	4.66667	3.5	5	80	0.686	1
105	0	84	2017-05-08 14:30:57	2017-05-23 14:26:10	14.9967	1	1	0	0	1	1	0	1	173	85	4.15	3.04	0.75	3.22	93	226	14.1	1.09	3.56	40.2	14.9		9	4	5	30.6	8	14	10.4	3.5	53	1	0	1	0	0	1	6.60377	3.5	5	50	0.732	1
106	1	65	2016-05-12 15:46:36	2016-05-25 10:30:52	12.7807	30	1	0	1	0	0	0	0	110	62	6.88	4.32	1.3	4.67	151	130	13.8	1.1	2.33		15.9		12	5	7	37.4	18	21	4.8	3.5	47	1	1	1	0	0	1	7.44681	3.5	5	40	0.628	1
111	0	49	2018-04-02 16:12:47	2018-04-13 10:38:03	10.7675	2	1	0	0	0	0	0	0	104	69	5.05	3.26	1.24	3.74	115	269	12.7	0.97	4.74	42	15.2	0.26	7	3	4	45.4	9	15	4	3.5	52	1	0	1	1	0	1	6.73077	3.5	5	100	0.645	1
101	1	43	2018-05-16 09:30:39	2018-05-24 10:35:23	8.04495	3	1	0	1	0	0	0	0	126	78	9.33	7.93	0.98	4.57	146	243	13.2	1.02	3.98	37.9	15.8	0.98					28		5.7	3.5	52	1	1	1	0	0	1	6.73077	3.8	5	60	0.85	1
112	1	75	2017-10-01 12:50:52	2017-10-10 10:41:37	8.91024	3	0	0	0	1	0	0	2	147	76	4.75	3.07	1.3	4.41	132	198	12.5	0.94	3.45	32.3	16.3	0.65	12	5	7	36.3	15	18	7.7	3.5	46	1	0	1	1	0	1	7.6087	3.8	5	150	0.646	1
97	1	49	2019-03-17 13:14:57	2019-03-29 10:21:53	11.8798	5	1	0	0	1	0	0	0	132	88	7.69	6.78	0.57	4.21	143	154	12.3	0.97	4.21		15.7	0.62	11	4	7	38.5	9	19	5.1	3.5	79	1	0	1	0	0	1	4.43038	4	5	60	0.882	1
113	1	79	2016-07-19 07:16:08	2016-07-24 09:20:37	5.08645	7	0	0	0	0	0	0	1	135	75	7.33	4.8	1.6	3.54	109	210	14	1.09	4.49		17.5		9	4	5	34.6	11	20	5.8	3.5	67	0	0	1	1	0	1	5.22388	4.5	5	150	0.66	2
110	1	82	2019-01-29 18:14:35	2019-02-18 10:23:24	19.6728	7	1	0	0	1	0	0	1	151	84	12.34	10.01	1.48	4.97	154	257	13.9	1.1	4.47		15.9	1.55	15	7	8	33.2	10	20	5.1	3.5	65	1	0	1	1	0	1	5.38462	4.6	5	100	0.818	2
99	0	67	2018-10-08 23:42:05	2018-10-19 10:19:54	10.4429	4	1	0	0	1	0	0	0	109	70	7.06	3.85	2.38	3.91	122	282	12.7	0.95	5.06	39.8	15.2	0.47	17	5	12	37.4	10	17	4.9	3.5	56	1	0	1	0	0	1	6.25	4.7	5	80	0.546	2
103	1	61	2017-11-03 12:07:30	2017-11-06 10:03:35	2.91395	2	1	1	1	0	0	0	1	137	82	6.68	4.24	1.82	4.86	151	213	12.5	0.94	2.97	33.9	16.5	1.11	14	6	8	36.6	24	32	10.1	3.5	86	0	1	1	0	0	1	4.06977	4.8	5	150	0.636	2
102	1	70	2017-12-10 16:52:05	2017-12-18 13:42:56	7.86865	60	0	1	1	1	0	0	2	112	78	9.87	8.4	1.02	4.6	153	300	13.3	1.03	3.11	35.8	18.3	0.38	23	11	12	32.2	19	26	5.7	3.5	65	0	0	1	0	0	1	5.38462	5	5	160	0.851	2
98	1	46	2019-03-09 18:32:59	2019-03-19 11:06:37	9.69002	10	1	1	1	0	0	0	0	135	95	9.82	6.73	1.87	4.81	147	203	12.4	0.95	3.29		16.2	0.18	12	4	8	36.4	18	13	4.4	3.5	78	0	1	1	0	1	1	4.48718	5.3	5	80	0.686	2
107	0	82	2015-10-09 10:44:14	2015-10-14 10:12:10	4.97773	3	1	0	0	0	0	0	0	154	80	10.8	9.6	0.6	3.82	110	198	14	1.07	2.2		17.4		8	3	5	33.9	12	17	7.4	3.5	58	0	0	1	0	0	1	6.03448		5	100	0.888
108	1	74	2015-05-25 15:49:34	2015-06-18 09:59:57	23.7572	90	1	0	0	0	0	0	2	110	65	7.07	4.6	1.7	3.33	105	218	14.1	1.08	3.2		14.4		13	5	8	37.6	15	22	5.4	3.5	52	0	0	1	0	1	1	6.73077		3	130	0.656
115	0	53	2018-07-06 16:43:24	2018-07-23 10:19:19	16.7333	7	0	0	0	1	0	0	1	157	104	4.88	2.96	1.42	4.2	136	242	13.2	1.02	3.43	44.8	16.2	0.44	10	4	6	37.8	15	17	4.5	3.6	49	1	1	1	0	0	1	7.34694	3.6	5	70	0.607	1
116	1	66	2018-03-16 15:49:53	2018-03-24 10:43:27	7.7872	6	0	1	0	0	0	0	0	137	92	8.92	5.7	2.2	4.84	155	193	12.7	0.97	3.96	35.8	16.3	2.1	12	5	7	41.3	36	33	5.7	3.6	55	0	0	1	0	1	1	6.54545	4.3	4	80	0.639	1
119	0	83	2017-10-08 11:51:21	2017-10-16 09:50:25	7.91602	10	1	0	0	0	0	0	1	113	61	7.01	4.68	1.71	4.11	132	228	12.7	0.96	4.61	36.4	15.9	1.5	11	5	6	41.7	12	20	6.2	3.6	59	0	1	1	0	1	1	6.10169	4.6	5	100	0.668	2
117	1	63	2017-12-25 21:20:53	2018-01-03 15:21:23	8.75035	5	1	1	1	1	0	0	0	157	99	7.12	4.29	1.97	4.81	141	225	12.8	0.98	4.03	36.6	15.1	0.42	10	5	5	40.3	22	20	5.8	3.6	74	1	0	1	0	0	1	4.86486	4.8	5	80	0.603	2
114	1	67	2019-02-08 18:28:55	2019-02-18 09:34:12	9.62867	15	1	1	0	1	0	0	1	142	80	6.61	4.37	1.55	4	131	212	12.9	1	3.33		0.89	0.37					21		6.1	3.6	63	0	0	1	0	0	1	5.71429	5.2	5	100	0.661	2
118	1	71	2017-12-16 15:14:56	2017-12-29 11:07:22	12.8281	6	1	0	1	1	0	0	1	161	97	10.06	8.57	0.95	3.39	114	200	12.3	0.93	4.29	35.5	16.1	0.38	10	4	6	32.1	24	29	6.9	3.6	61	1	1	1	0	1	1	5.90164		5	150	0.852
122	1	78	2018-10-31 19:03:28	2018-11-05 13:31:24	4.7694	3	1	0	1	0	0	0	2	153	79	5.65	3.9	1.38	4.46	138	198	12.7	0.95	4.21	34.9	15.3	0.56					53		5.1	3.7	47	1	0	1	0	0	1	7.87234	3.7	5	140	0.69	1
125	1	75	2017-05-29 10:36:51	2017-06-26 10:42:02	28.0036	3	0	0	0	0	0	0	0	145	83	6.7	3.68	1.64	4.58	129	247	13.9	1.07	3.24	39.1	16.1		8	3	5	38	26	28	4.9	3.7	66	1	0	1	0	1	1	5.60606	3.7	5	100	0.549	1
127	0	40	2017-04-02 18:21:39	2017-04-14 15:15:56	11.871	10	1	0	0	0	0	0	0	132	64	6.15	3.36	2.24	3.44	113	224	13.5	1.03	2.56	37	16		12	5	7	38	19	24	4.3	3.7	56	1	0	1	0	0	1	6.60714	3.7	5	80	0.547	1
128	1	78	2016-10-17 15:45:28	2016-10-22 14:38:18	4.95336	30	1	0	0	1	0	0	2	149	73	6.89	4.58	0.48	3.83	128	180	13.8	1.06	3.46	39.9	15.6		25	10	15	36.8	12	24	4.2	3.7	64	0	0	1	0	0	1	5.78125	3.7	5	140	0.664	1
131	1	62	2015-05-06 10:21:52	2015-05-15 10:47:52	9.01806	30	1	1	0	1	0	0	2	111	60	7.31	4.24	2.38	4.13	120	250	13.6	1.02	3.21		15.5		13	3	10	34.4	7	13	4.4	3.7	62	0	1	1	0	0	1	5.96774	3.7	5	100	0.579	1
132	0	82	2014-12-23 18:40:03	2015-01-12 10:55:22	19.6773	15	0	0	0	1	0	1	1	143	64	11.46	9	1.5	3.5	130	220	13.8	1.06	5.27		15.3								5.9	3.7	49	1	0	1	0	0	1	7.55102	3.7	5	90	0.784	1
130	0	79	2015-11-17 14:31:06	2015-11-20 14:31:55	3.00057	10	1	0	0	0	0	0	2	142	72	6.36	4.6	1.3	4.28	137	287	13	0.97	2.93	34.2	15.9		17	7	10	39.6	5	8	3.8	3.7	41	0	0	1	0	0	1	9.02439	4.2	5	180	0.73	1
123	1	63	2018-02-18 14:58:23	2018-02-27 09:37:04	8.77686	10	1	1	1	0	0	0	2	132	78	7.19	5.82	0.93	4.04	122	180	13	1	5.04	34.6	16.9	0.46	7	4	3	34	17	19	6	3.7	54	1	1	1	0	0	1	6.85185	4.4	5	140	0.811	1
121	1	69	2018-12-02 12:33:53	2018-12-06 09:08:47	3.85757	3	1	0	0	1	0	0	2	131	77	6.17	5.07	0.6	3.97	120	246	13.3	1.04	4.49	37.6	16.7	0.45					42		6.6	3.7	66	1	0	1	0	1	1	5.60606	5.5	5	150	0.822	3
126	1	54	2017-04-20 20:39:04	2017-04-28 14:05:08	7.72644	4	1	0	0	0	0	0	1	136	87	6.28	4.18	1.58	4.85	144	189	12.1	0.9	3.83	30.1	15.7	0.5	8	3	5	36.3	7	16	9.1	3.7	68	1	0	1	0	0	1	5.44118	5.9	5	100	0.664	3
129	1	70	2016-10-12 08:55:52	2016-10-20 11:56:23	8.12536	5	1	1	0	0	0	0	0	104	65	5.48	3.3	1.6	4.82	147	118	13.8	1.04	2.8	41.3	16.6		12	5	7	36.1	9	17	5	3.7	76	0	0	1	0	0	1	4.86842	6.2	5	100	0.598	3
120	1	85	2019-01-30 19:17:29	2019-02-09 11:28:15	9.67414	3	0	0	0	0	0	0	2	135	75	11.2	7.03	2.26	4.17	136	290	12.8	0.99	4.46		16.1	1.58	11	5	6	52.7	13	20	7.8	3.7	96	1	0	1	0	0	1	3.85417	6.3	5	200	0.627	3
124	1	67	2017-12-16 18:16:09	2017-12-25 10:56:20	8.69457	30	1	1	0	0	0	0	0	132	90	9.39	6.99	1.57	5.3	160	246	12.5	0.95	4.73	40.3	16.3	0.53	10	5	5	42.8	25	26	6.2	3.7	60	1	1	1	0	1	1	6.16667	6.8	5	100	0.745	4
133	1	51	2018-04-26 13:44:19	2018-05-11 10:33:25	14.8674	10	1	0	0	0	0	0	0	120	76	5.38	3.17	1.73	4.06	127	164	13.3	1.03	3.77	39.5	15.4	0.27	6	3	3	38.8	23	20	11.7	3.8	101	1	0	1	0	0	1	3.76238	3.8	5	50	0.589	1
134	1	68	2017-12-17 10:29:44	2017-12-22 10:46:18	5.0115	60	1	1	1	0	0	0	0	176	100	7.55	4.46	2.48	4.69	148	214	13.3	1.03	9.21	48.7	16.2	0.58	13	6	7	42.5	23	32	9.6	3.8	69	1	1	1	0	0	1	5.50725	3.8	5	150	0.592	1
136	1	81	2016-12-07 18:28:37	2016-12-21 11:21:33	13.7034	15	1	0	0	1	1	0	1	137	84	5.65	3.06	1.84	4.49	138	277	14.2	1.1	3.56	39.5	17.1		10	4	6	39.2	23	32	5.3	3.8	82	1	0	1	0	1	1	4.63415	3.8	5	80	0.541	1
139	0	81	2016-06-28 11:35:06	2016-07-13 10:37:13	14.9598	7	0	0	0	1	0	0	2	102	62	6.32	4.1	1.6	3.54	106	228	13.8	1.07	3.17		14.9		8	3	5	34.4	11	28	5.2	3.8	58	1	0	1	0	0	1	6.55172	3.8	3	120	0.649	1
144	1	57	2014-12-10 12:04:38	2014-12-18 10:51:38	7.94931	10	0	1	1	0	0	0	0	120	83	8.21	6.2	1.5	4.83	153	305	13.4	1.02	2.35		15.6								4.9	3.8	58	0	0	1	0	0	1	6.55172	3.8	5	80	0.755	1
137	1	64	2016-11-07 21:06:10	2016-11-16 11:25:17	8.59661	15	1	1	1	1	0	0	1	156	96	6.28	3.4	2.1	4.31	141	242	13.2	0.98	3.07	37	16		7	3	4	37.8	19	23	4.1	3.8	67	1	1	1	0	0	1	5.67164	4.6	5	80	0.547	2
143	1	62	2015-03-26 13:42:05	2015-04-03 11:59:12	7.92855	3	1	0	0	0	0	0	0	132	73	6.3	5	1.1	4.48	142	180	13.8	1.04	2.5		16.5		8	4	4	34.2	9	14	5.5	3.8	58	0	0	1	0	0	1	6.55172	4.6	5	100	0.787	2
142	1	68	2015-07-15 14:29:36	2015-08-10 09:33:16	25.7942	7	1	0	1	1	0	0	2	147	94	8.84	7.69	0.74	3.58	117	157	14.5	1.12	5.22		14.6	2.18	12	4	8	34.5	24	33	10	3.8	67	1	0	1	0	1	1	5.67164	5	5	200	0.87	2
140	1	66	2016-04-19 10:11:07	2016-04-30 10:48:17	11.0258	15	1	1	0	1	0	0	0	142	80	7.12	4.33	1.73	4.6	138	290	14.1	1.1	4.44	38.3	16.4		25	8	17	34.3	9	16	6.5	3.8	68	1	0	1	0	0	1	5.58824	5.5	5	100	0.608	3
135	1	78	2017-09-28 14:16:41	2017-10-10 10:20:02	11.8357	7	1	0	0	0	0	0	0	148	76	7	4.56	1.62	3.85	120	225	12.5	0.94	3.63	29.3	17.1	0.87	5	2	3	36.4	12	21	5.2	3.8	60	1	0	1	0	1	1	6.33333	5.7	5	120	0.652	3
138	1	75	2016-08-14 10:38:02	2016-08-24 09:59:15	9.97307	7	0	1	0	1	0	1	1	140	70	7.7	5.7	1.1	4.72	138	282	12.5	0.91	4.57		16.2		9	3	6	37	18	22	6.5	3.8	71	0	0	1	0	1	1	5.35211	6	5	150	0.744	3
141	1	76	2016-01-19 18:07:24	2016-01-25 10:00:08	5.66162	15	1	1	0	0	0	0	2	166	107	6.6	3.9	1.9	3.69	129	217	15.3	1.2	2.63	38.6	15.3		14	5	9	34.1	10	14	5.4	3.8	63	1	0	1	0	0	1	6.03175	6.8	5	80	0.594	4
157	1	47	2015-09-09 16:02:21	2015-09-21 13:53:44	11.9107	30	0	0	0	0	0	0	2	118	75	9.16	6.61	1.82	4.91	129	269	13.2	0.99	3.43		17.6		7	2	5	44.5	19	11	6.6	3.9	64	1	0	1	0	0	1	6.09375	3.7	5	160	0.722	1
158	0	77	2015-06-29 17:03:00	2015-07-08 09:49:59	8.69929	80	1	0	0	0	0	0	1	163	83	6.34	4.6	1.5	3.74	106	170	13.7	1.04	3.63		18.4		13	4	9	39.6	12	20	5.9	3.9	52	0	0	1	0	0	1	7.5	3.8	5	80	0.719	1
156	0	43	2015-10-08 14:15:08	2015-10-16 10:22:38	7.83854	7	1	0	0	0	0	0	0	148	96	6.4	4.8	1.2	4.83	142	307	12.5	0.92	3.27		16.4						22	24	5.4	3.9	54	1	0	1	0	0	1	7.22222	3.9	5	100	0.752	1
146	1	56	2018-06-20 11:13:22	2018-06-26 11:14:30	6.00079	2	1	0	1	0	0	0	1	122	70	14.55	11.95	1.19	4.99	155	260	14.4	1.15	5.94	37	14.9	0.5	34	12	22	35.7	10	14	6.5	3.9	60	1	0	1	0	0	1	6.5	4.5	5	80	0.821	2
153	1	38	2016-04-13 14:06:24	2016-04-25 10:49:03	11.863	7	1	0	0	0	0	0	2	139	84	7.09	6.3	0.6	5.13	151	168	12.4	0.96	3.66	30.8	15.5		10	6	4	37.1	18	23	5.2	3.9	65	1	0	1	0	0	1	6	4.5	5	80	0.883	2
155	0	83	2015-10-22 07:48:34	2015-10-29 10:57:08	7.13095	1	1	0	0	1	1	0	0	117	79	6.49	4.1	1.5	3.96	119	305	13.2	0.99	3.79	37.6	15.6		7	3	4	35.3	16	17	11.2	3.9	78	0	0	1	0	0	1	5	4.7	5	150	0.628	2
149	1	81	2017-06-29 17:56:33	2017-07-09 10:24:43	9.68623	5	1	0	1	1	0	0	0	167	91	5.11	3.02	1.48	4.75	153	166	11.9	0.88	3.29	34.6	15.3		5	8	33	34.8	23	35	2.8	3.9	69	1	0	1	0	0	1	5.65217	4.8	5	150	0.591	2
148	1	81	2018-01-21 00:28:17	2018-01-29 13:40:11	8.54993	2	0	0	0	0	0	0	1	143	79	4.02	2.04	1.6	3.71	118	142	14.7	1.16	2.85	33.7	16.3	1.39	12	6	6	29.5	10	24	4.4	3.9	67	1	0	1	0	1	1	5.8209	5	5	100	0.508	2
151	1	68	2017-02-18 20:28:04	2017-02-27 11:03:10	8.60771	7	1	1	1	0	0	0	0	140	89	9.43	6.99	1.8	4.8	158	194	12.3	0.92	3.73	28.9	16.8		28	7	21	37.7	16	21	4.5	3.9	57	0	0	1	0	1	1	6.84211	5.1	5	80	0.741	2
145	1	60	2018-12-25 15:21:25	2019-01-07 10:16:01	12.7879	10	0	1	0	0	0	0	1	106	69	5.78	3.01	1.79	4.1	128	260	13.3	1.04	3.02	36.8	17.4	0.38	7	2	5	39.7	25	27	4.5	3.9	68	1	1	1	0	0	1	5.73529	5.2	5	60	0.521	2
147	1	85	2018-05-27 17:16:28	2018-06-14 10:02:59	17.699	5	1	0	0	1	0	0	0	146	83	10.02	6.94	2.22	4.78	148	195	12.1	0.91	4.61	32.7	15.4	0.72	18	8	10	28.5	6	19	5.2	3.9	96	1	0	1	0	0	1	4.0625	5.2	4	100	0.692	2
150	1	77	2017-06-01 16:26:34	2017-06-10 10:07:42	8.7369	3	1	1	0	1	0	0	1	184	78	6.3	4.29	1.4	4.64	135	271	13.3	1.01	3.89	52.6	16.6	0.93	10	9	1	39.8	19	51	4.9	3.9	29	1	1	1	0	0	1	13.4483	5.2	5	80	0.68	2
159	1	67	2015-04-23 17:43:14	2015-05-04 10:02:32	10.6801	7	1	0	1	0	0	0	1	154	82	6.14	5.19	0.77	4.05	133	163	13.5	1.01	4.11		14.7		15	5	10	38.9	35	22	7.4	3.9	59	0	0	1	0	0	1	6.61017	5.7	5	100	0.845	3
152	1	74	2016-07-12 14:02:26	2016-07-26 10:48:07	13.8651	30	1	0	0	0	0	0	1	154	80	6.55	4.5	1.5	3.87	113	161	12.7	0.96	3.09		16		14	9	5	40.8	51	53	8	3.9	36	1	1	1	0	1	1	10.8333	6.4	5	100	0.693	3
154	1	66	2016-03-07 09:44:01	2016-03-16 11:26:16	9.07101	40	1	0	0	0	0	0	1	134	85	8.27	6.4	1.8	4.21	119	220	12.8	1	4.37		15.2		7	3	4	35.4	12	14	5	3.9	59	1	0	1	0	0	1	6.61017	9	5	80	0.695	4
167	1	62	2016-01-11 15:23:21	2016-01-21 10:49:32	9.80985	7	1	0	0	0	0	0	0	123	87	7.74	6.1	1.2	4.62	133	245	13	0.97	3.15	33.4	15.8		5	2	3	38.7	15	20	5.2	4	61	1	0	1	0	0	1	6.55738	3.5	5	50	0.792	1
169	1	66	2018-02-13 23:12:51	2018-02-22 10:34:19	8.47324	2	0	1	1	1	0	0	2	147	64	7.52	5.57	1.22	4.63	148	216	14.5	1.15	3.63	40.3	15.6	0.4	13	6	7	40.7	46	35	10.2	4	50	1	0	1	1	1	1	8	3.7	5	160	0.741	1
162	1	81	2017-09-19 16:15:14	2017-10-30 09:21:41	40.7128	1	1	0	0	1	0	0	2	134	76	6.43	3.7	1.56	4.49	127	205	13.8	1.07	5.7	43.7	15.8	1.6	8	4	4	35.5	7	15	5	4	58	1	0	1	0	0	1	6.89655	3.9	5	150	0.575	1
164	1	55	2017-03-09 15:34:58	2017-03-20 11:09:51	10.8159	7	1	0	0	0	0	0	0	132	85	7.33	5.27	1.55	4.22	129	172	15.2	1.19	3.16	44.8	15.3		5	2	3	38.8	88	47	5.7	4	79	1	1	1	0	0	1	5.06329	4	5	70	0.719	1
166	1	65	2016-08-15 17:40:11	2016-08-25 09:50:31	9.67384	30	1	1	1	1	0	0	0	155	75	11.5	9.2	1.4	4.43	134	237	13.8	1.04	3.81		15.8		17	6	11	40.4	14	18	4.7	4	69	1	0	1	0	0	1	5.7971	4	5	80	0.8	1
160	1	76	2018-05-28 10:13:37	2018-06-08 13:40:02	11.1433	10	1	1	1	1	0	0	2	114	71	6.52	5.32	0.56	4.43	126	285	13.1	1.01	8.23	37.6	16.3	4.54	13	8	5	30	13	24	5.2	4	50	1	0	1	0	0	1	8	4.3	5	90	0.816	1
165	1	62	2016-10-23 13:26:53	2016-10-31 09:47:23	7.84757	1	1	1	1	0	0	0	2	99	59	9.24	7.19	1.31	4.28	132	264	14	1.06	3.13	31.7	16		18	8	10	34.6	13	18	6	4	46	1	0	1	0	1	1	8.69565	4.5	5	140	0.778	2
170	1	71	2016-02-02 09:03:00	2016-02-14 10:19:13	12.0529	20	1	0	0	0	0	0	0	135	84	6.65	5.1	1	4.23	138	275	12.6	0.98	3.46	31.1	16.6		13	5	8	37.4	14	17	6.4	4	78	1	0	1	1	0	1	5.12821	4.6	5	80	0.774	2
161	1	63	2017-11-13 15:54:20	2017-11-23 10:15:42	9.76484	30	1	1	1	1	1	0	2	145	65	7.61	4.78	1.87	4.12	132	213	13.8	1.06	6.26	41.7	16.8	1.14	15	7	8	39.6	34	29	4.5	4	53	1	0	1	0	0	1	7.54717	5	4	120	0.628	2
163	1	82	2017-07-17 14:59:27	2017-07-18 10:57:13	0.831782	7	0	0	0	0	0	0	1	146	98	6.01	3.78	1.52	4.18	131	172	13.3	1.01	2.74	34.6	16	0.84	11	4	7	39.5	20	18	4.4	4	63	0	0	1	0	0	1	6.34921	5.1	5	80	0.629	2
168	0	66	2015-01-12 14:57:44	2015-01-22 09:39:08	9.77875	20	1	0	0	1	0	0	0	167	92	4.15	3.01	0.168	4.53	143	72	13.1	0.99	4.07		15.9		9	4	5	37.7	71	65	6.4	4	82	0	0	1	0	0	1	4.87805	5.1	5	100	0.726	2
179	1	44	2018-03-07 20:39:38	2018-03-13 13:18:35	5.69372	30	1	1	0	0	0	0	1	123	80	12.35	9.77	1.42	4.34	131	481	13.7	1.07	8.11	47	15.8	0.68	5	2	3	30.3	8	15	4.2	4.1	58	0	1	1	0	0	2	7.06897	3.2	5	40	0.791	1
180	1	81	2018-03-07 14:35:54	2018-03-31 10:34:59	23.8327	7	1	1	1	1	0	1	2	112	78	7.89	5.85	1.4	3.47	105	200	13.8	1.08	3.49	34.8	16.8	1.28	9	4	5	35.2	14	17	4.8	4.1	102	1	0	1	0	1	2	4.01961	3.8	5	170	0.742	1
178	1	81	2018-03-28 00:45:45	2018-04-04 10:12:06	7.3933	1	1	1	1	0	0	0	1	152	76	9.81	7.98	0.97	3.61	116	265	14.6	1.15	5.94	49.3	15.7	1.15	8	4	4	30.4	12	18	5.9	4.1	80	1	1	1	0	0	2	5.125	3.9	4	80	0.814	1
175	1	27	2018-06-21 14:31:12	2018-07-04 13:43:18	12.9667	3	1	0	0	0	0	0	1	135	91	8.15	4.34	3.01	5.12	157	215	12.5	0.96	3.48	36.7	15.6	0.18	8	4	4	43.5	10	15	6.2	4.1	76	1	1	1	0	0	2	5.39474	4.1	5	80	0.533	1
176	1	63	2018-04-30 19:38:17	2018-05-06 11:07:08	5.64503	10	1	0	0	1	0	0	0	135	76	6.81	4.15	1.97	4.27	135	314	13.1	1.01	3.64	36.8	15.9	0.41	7	2	5	40.4	14	16	4.3	4.1	75	1	0	1	0	0	2	5.46667	4.1	5	30	0.61	1
186	1	62	2016-11-07 10:25:50	2016-11-13 10:50:36	6.0172	6	1	0	0	1	0	0	0	135	85	8.14	5.79	1.34	5.25	165	170	14.2	1.08	2.01	28.3	18.2		13	5	8	44	42	25	5.6	4.1	54	1	1	1	0	0	2	7.59259	4.1	4	100	0.711	1
187	1	55	2016-01-31 20:38:28	2016-02-06 09:55:02	5.55317	7	1	0	0	0	0	0	1	122	62	9.21	8.4	0.5	4.71	138	244	13.2	1.04	3.02	36	15.5		8	3	5	35.2	12	16	6.5	4.1	59	1	0	1	0	0	2	6.94915	4.1	5	100	0.913	1
177	1	75	2018-04-15 16:54:12	2018-04-26 10:45:57	10.7443	1	1	1	0	0	0	0	0	153	87	7.41	5.06	1.72	4.8	153	155	13.6	1.06	4.38	34.6	17	0.45	14	5	9	29.9	22	25	6	4.1	83	1	1	1	0	0	2	4.93976	4.6	5	100	0.683	2
183	0	65	2017-09-10 19:42:01	2017-09-17 11:17:38	6.64973	3	0	0	0	0	0	0	1	116	65	9.79	6.46	1.98	3.3	97	287	13.3	1.02	4.39	33.1	16.3	1.09	6	3	3	30.7	13	23	8.9	4.1	64	1	1	1	0	0	2	6.40625	4.7	4	40	0.66	2
171	1	51	2018-12-06 01:28:28	2018-12-21 15:24:11	15.5804	1	1	1	0	0	0	0	0	100	70	17.03	15.7	0.84	4.24	133	266	12.2	0.93	3.03	33	15.7	10.98	5	2	3	34.8	15	23	6	4.1	50	1	0	1	0	0	2	8.2	4.8	3	80	0.922	2
174	1	73	2018-07-14 14:32:57	2018-07-21 10:31:49	6.83255	7	1	0	1	1	0	0	1	139	72	6.26	4.41	1.36	3.82	116	251	12	0.91	5.59	33.2	14.3	1.43	9	4	5	37.3	33	26	6.1	4.1	71	1	0	1	1	0	2	5.77465	5.1	5	80	0.704	2
181	1	68	2018-02-13 17:07:50	2018-02-22 14:33:37	8.89291	30	0	1	1	0	0	0	0	153	83	6.66	4.98	1.04	4.25	144	241	13.2	1.02	3.68	42.7	15.1	0.34	8	3	5	33.2	12	22	4.7	4.1	64	1	0	1	0	0	2	6.40625	5.1	5	100	0.748	2
185	1	54	2017-01-05 19:02:53	2017-01-08 15:09:48	2.83814	14	1	0	0	0	0	0	1	121	76	5.82	4.15	1.1	4.61	148	222	12.8	0.96	5.39	41.9	15.2		8	3	5	32.9	18	22	6.3	4.1	66	0	0	1	0	0	2	6.21212	5.2	5	40	0.713	2
172	1	61	2018-08-25 17:24:44	2018-08-31 15:11:20	5.90736	5	0	1	0	0	0	0	0	111	68	8.84	5.77	1.99	4.28	135	248	13.6	1.07	3.31	32.2	15.1	0.39	7	3	4	30.4	6	10	4.9	4.1	70	1	1	1	0	0	2	5.85714	5.3	5	100	0.653	2
182	1	66	2017-11-18 19:30:22	2017-11-23 10:28:08	4.62345	5	1	0	0	0	0	0	1	140	78	6.43	4.22	1.55	4.62	145	151	13.8	1.06	3.57	39.1	16.7	0.34	13	5	8	34.7	21	24	4	4.1	85	1	0	1	0	1	2	4.82353	5.4	5	80	0.656	3
188	1	81	2015-11-30 10:11:18	2015-12-11 10:34:05	11.0158	6	1	0	0	1	0	0	1	160	90	8.61	7.2	0.8	4.72	141	189	12.9	0.96	4.53	37.1	17.5		10	4	6	33.3	17	26	5.2	4.1	59	1	0	1	0	0	2	6.94915	5.5	5	100	0.841	3
184	1	68	2017-09-10 10:50:06	2017-09-21 10:50:31	11.0003	4	0	0	1	1	1	0	0	116	69	7.13	3.94	2.58	4.29	142	184	13.2	1.01	3.84	32.6	16.2	2.11	14	6	8	38.6	11	17	4.6	4.1	69	1	1	1	0	0	2	5.94203	5.7	5	80	0.552	3
173	1	85	2018-08-10 18:48:48	2018-08-24 10:52:47	13.6694	7	1	0	1	1	0	0	0	189	89	5.48	4.01	0.84	4.09	121	109	12.9	1	3.69	34.5	16.2	0.76	18	6	12	39.3	22	39	9.2	4.1	57	1	0	1	0	1	2	7.19298	6.3	5	65	0.733	3
190	1	61	2016-07-08 08:56:34	2016-07-19 11:11:24	11.0936	3	1	0	0	1	0	0	0	134	78	6.08	3.8	1.6	4.41	137	170	12.5	0.94	3.02		16.1		8	3	5	36.4	5	16	4.9	4.1	57	0	0	1	1	0	2	7.19298	6.3	5	100	0.626	3
189	1	84	2015-06-18 18:29:45	2015-07-18 14:24:23	29.8296	1	0	0	0	0	0	0	1	156	59	10.54	8.3	1.1	3.72	114	184	15.4	1.21	5.18	37.1	13.9		19	11	8	31	17	22	4.6	4.1	83	1	1	1	0	1	2	4.93976	6.8	5	50	0.789	4
191	1	69	2019-04-14 17:19:17	2019-04-18 10:54:47	3.73299	1	0	0	0	0	0	0	1	145	103	7.08	5.18	0.89	3.33	108	259	15.6	1.27	7.06		14.3	0.97	8	3	5	32.6	9	16	5.9	4.2	111	0	0	1	0	0	2	3.78378	3.4	5	80	0.732	1
203	1	88	2015-04-15 17:38:35	2015-04-18 16:48:30	2.96522	30	1	0	0	0	0	0	2	130	82	10.89	8.34	1.48	3.76	119	248	14.9	1.14	4.69		13.9		26	9	17	31.1	11	19	5.9	4.2	88	0	0	1	0	0	2	4.77273	4	5	160	0.766	1
196	1	75	2017-11-20 11:44:09	2017-11-28 15:21:34	8.15098	7	1	0	0	0	0	0	1	175	81	7.42	4.57	1.61	4.19	116	284	12.5	0.93	3	34.4	16.4	0.57					29		6.2	4.2	56	1	0	1	0	0	2	7.5	4.2	5	100	0.616	1
198	1	71	2017-03-29 20:57:01	2017-04-10 11:52:38	11.622	4	1	0	1	0	0	0	1	145	81	6.99	4.97	1.27	4.18	133	285	12.7	0.95	2.81	33.5	16.4	1.42	7	2	5	33.7	9	16	5.3	4.2	67	1	1	1	0	0	2	6.26866	4.2	5	80	0.712	1
200	1	62	2016-07-04 10:48:30	2016-07-18 10:22:59	13.9823	15	1	0	1	0	0	0	0	118	77	6.54	3.3	2.3	4.78	138	218	13.9	1.07	1.6		19.6		7	3	4	38.4	21	27	6	4.2	70	1	0	1	0	0	2	6	4.2	5	50	0.512	1
201	1	69	2016-06-01 14:36:36	2016-06-13 13:47:11	11.9657	10	0	0	1	0	0	0	2	136	82	6.94	5.7	0.9	4.56	144	136	13	0.98	2.62		16.9	0.74	10	4	6	38.5	17	19	7.5	4.2	62	1	1	1	0	0	2	6.77419	4.2	5	160	0.827	1
204	1	74	2018-11-09 12:54:28	2018-11-16 10:40:22	6.90688	60	1	0	0	0	0	0	0	127	88	4.68	2.6	1.39	5	135	220	12.9	0.98	3.06	34.2	16.3	0.29					26		7.4	4.2	56	1	0	1	1	0	2	7.5	4.2	5	80	0.556	1
205	1	67	2017-10-09 15:49:10	2017-10-19 10:12:06	9.76593	90	1	1	1	0	0	0	0	100	58	4.89	2.72	1.44	4.04	125	224	13.5	1.04	2.73	39.9	21.5	0.2	11	5	6	44.7	22	23	8.5	4.2	53	1	1	1	1	0	2	7.92453	4.2	5	80	0.556	1
206	1	78	2016-10-17 21:12:28	2016-10-31 10:08:30	13.5389	3	0	1	0	1	1	1	0	134	80	2.92	2.47	0.4	4.36	92	137	15	1.18	3.04	38.1	19.4	1.62	13	7	6	38.5	8	17	6.9	4.2	73	1	0	1	1	0	2	5.75342	4.2	4	120	0.846	1
207	1	66	2015-10-20 12:41:54	2015-11-02 09:57:42	12.886	2	1	1	0	1	0	1	2	113	58	12.76	10.3	1.37	3.96	125	178	14.9	1.16	5.03	36.8	15.2	0.59	22	9	13	34.1	13	20	5.4	4.2	58	1	0	1	1	0	2	7.24138	4.2	5	130	0.807	1
208	1	85	2014-12-26 15:51:14	2015-01-05 10:11:26	9.76403	10	0	0	0	1	0	0	1	120	80	6.82	4.26	1.45	4.3	133	194	13.2	1	3.82		15.5	1.16	10	4	6	36.7	36	38	5.5	4.2	56	0	0	1	1	0	2	7.5	4.2	5	120	0.625	1
197	1	79	2017-10-01 21:19:07	2017-10-15 10:02:04	13.5298	10	1	1	1	0	0	0	2	135	75	6.83	3.39	2.42	3.33	118	102	16.4	1.33	2.37	38.4	17.4	1.33	11	7	4	28.9	19	42	6	4.2	88	1	1	1	0	0	2	4.77273	4.4	5	190	0.497	1
193	1	41	2018-12-29 14:51:28	2019-01-11 10:39:19	12.8249	15	0	1	1	0	0	0	0	125	68	8.33	3.95	3.11	4.65	147	286	13.2	1	2.93	36.3	15.2	0.32	13	4	9	43.2	58	30	4.6	4.2	57	1	1	1	0	0	2	7.36842	4.7	5	60	0.475	2
194	1	70	2018-10-01 14:38:09	2018-10-10 13:17:59	8.94433	7	0	0	0	1	1	1	2	145	75	6.19	4.01	1.43	4.05	135	265	13.3	1.01	3.98	30.5	15.8	0.53	9	4	5	33.9	10	15	5.9	4.2	72	1	1	1	0	0	2	5.83333	4.7	5	140	0.648	2
202	1	66	2015-12-01 22:02:28	2015-12-10 10:10:37	8.50566	9	1	0	0	0	0	0	0	145	88	5.65	3.7	1.54	4.68	144	193	14.8	1.15	2.95	41.7	15.7		8	4	4	38.1	8	15	5.9	4.2	83	1	0	1	0	0	2	5.06024	5.2	5	60	0.654	2
199	1	62	2016-10-02 14:26:48	2016-10-12 11:16:34	9.86789	7	1	0	0	1	0	0	1	170	80	7.47	5.27	1.6	4.33	132	215	13.6	1.02	3.5		15.3		22	11	11	41.7	30	21	5.2	4.2	69	0	1	1	0	0	2	6.08696	5.5	5	80	0.705	3
195	1	70	2017-12-24 23:36:42	2018-01-02 11:06:03	8.47872	1	1	1	1	0	0	0	1	133	77	4.99	3.08	1.38	3.96	134	20	12	0.91	3.84	30.3	14.6	0.27	9	4	5	29.4	9	13	4.4	4.2	68	1	1	1	0	0	2	6.17647	5.6	5	100	0.617	3
192	1	76	2019-01-23 08:31:49	2019-02-03 12:34:02	11.1682	11	0	0	0	1	1	0	0	147	90	7.24	4.92	1.85	4.8	142	201	13.7	1.05	3.04		15.2	0.31	9	4	5	41.2	17	17	7.6	4.2	94	1	0	1	0	1	2	4.46809	7.6	4	60	0.679	4
224	1	75	2015-08-05 18:51:28	2015-08-13 09:29:23	7.60966	2	0	0	1	0	0	0	1	158	82	10.87	8.7	1.2	4.72	128	145	12.9	0.96	3.39	30.4	16.2		9	3	6	37.3	20	27	2.8	4.3	77	1	0	1	0	0	2	5.58442	3.5	4	80	0.802	1
212	1	84	2018-05-15 15:18:42	2018-06-05 10:18:28	20.7915	30	1	0	1	1	0	1	1	144	70	6.48	4.3	1.37	3.4	108	190	13.6	1.06	3.97	35.6	15.6	1.77	8	4	4	39.1	13	21	7.6	4.3	84	1	1	1	0	0	2	5.11905	4.3	5	90	0.664	1
216	0	86	2017-09-24 09:10:55	2017-10-06 10:18:59	12.0473	1	1	0	0	1	0	1	2	156	70	11.52	9.33	1.29	4.34	128	207	15	1.19	3.78	36.3	16.1	0.93					27		7.9	4.3	49	1	0	1	0	0	2	8.77551	4.3	5	60	0.81	1
217	1	63	2017-07-30 18:23:10	2017-08-08 10:14:02	8.66032	5	0	1	1	0	0	0	1	147	85	7.74	6.58	0.87	4.33	141	261	13	0.99	4.65	35.9	14.8	0.35					26		7.6	4.3	52	0	1	1	0	0	2	8.26923	4.3	5	100	0.851	1
218	1	40	2017-05-25 14:53:37	2017-06-05 11:01:24	10.8387	60	0	0	1	0	0	0	2	112	77	6.58	4.47	1.45	4.31	141	162	13.5	1.03	3.16	29.5	15.7		7	3	4	36.3	15	13	6.5	4.3	70	1	0	1	0	0	2	6.14286	4.3	5	120	0.679	1
219	0	71	2017-03-22 08:10:04	2017-04-05 14:13:10	14.2522	1	0	0	0	1	0	0	0	151	77	6.83	4.63	1.8	2.89	93	254	14.2	1.1	4.34	29.8	15.8	1.77	12	4	8	36.6	6	16	6.7	4.3	47	1	0	1	0	0	2	9.14894	4.3	5	80	0.678	1
220	1	75	2016-09-08 13:46:33	2016-09-20 13:50:07	12.0025	60	0	0	0	0	0	0	0	144	85	7.03	4.42	1.7	4.41	143	232	14.1	1.09	3.77		17.2		8	3	5	38.2	11	28	4.8	4.3	76	0	0	1	0	0	2	5.65789	4.3	5	100	0.629	1
221	1	57	2016-08-26 15:56:33	2016-09-01 09:44:07	5.74137	10	1	0	0	0	0	0	0	134	84	8.75	6.6	1.2	4.44	120	259	13	0.96	3.73		15.7		18	7	11	38.6	18	16	4.8	4.3	46	1	1	1	0	0	2	9.34783	4.3	5	120	0.756	1
222	1	80	2016-05-05 11:23:55	2016-05-16 10:10:44	10.9492	2	0	0	0	0	0	1	0	137	86	5.87	3.58	1.51	4.84	146	185	15.3	1.21	3.8		20.9		15	7	8	39.5	34	27	4.7	4.3	67	1	0	1	0	0	2	6.41791	4.3	5	100	0.61	1
215	1	56	2017-10-11 15:52:13	2017-10-30 12:28:31	18.8585	3	1	0	0	0	1	0	0	109	66	3.31	1.85	1.13	3.19	107	75	16.5	1.34	1.79	36.8	18.5	6.51	44	32	12	21.5	17	39	6.1	4.3	56	1	0	1	0	1	2	7.67857	4.4	5	100	0.559	1
226	1	80	2014-12-23 16:39:43	2014-12-29 12:17:58	5.81823	120	1	0	0	1	0	0	0	142	60	10.36	7.1	0.188	4.69	162	263	13.5	1.03	3.24		16		7	3	4	37.9	26	30	5.7	4.3	73	0	0	1	0	0	2	5.89041	4.4	5	100	0.688	1
211	1	85	2018-08-27 15:29:32	2018-09-06 12:30:13	9.87547	1	1	1	0	1	0	0	0	169	99	4.56	2.4	1.69	3.16	102	113	14.1	1.12	4.24	39.8	16.1	0.67	18	8	10	34.5	26	56	7.5	4.3	57	1	1	1	0	1	2	7.54386	4.8	5	150	0.527	2
223	1	55	2015-12-05 09:52:45	2015-12-15 09:45:12	9.99476	1	1	1	0	0	0	0	0	121	61	12.18	10.2	1.3	5.06	153	337	12.7	0.94	4.44	37	16.3		20	7	13	38.1	22	15	5.8	4.3	63	1	0	1	0	0	2	6.8254	4.9	5	160	0.837	2
228	1	70	2016-03-04 00:24:39	2016-03-12 10:50:45	8.43479	1	0	0	1	0	0	0	0	106	68	3.96	3.5	0.3	3.84	125	193	14.1	1.13	2.83		15.9		8	3	5	35.9	16	19	6	4.3	55	1	0	1	1	0	2	7.81818	5	5	100	0.883	2
213	1	78	2018-04-17 16:15:55	2018-04-25 11:11:18	7.78846	4	0	0	0	0	1	0	1	151	84	4.26	2.46	1.4	3.75	122	208	13.2	1.02	6.7	31.6	15.7	0.55	7	3	4	36.9	13	21	5.6	4.3	52	0	0	1	0	0	2	8.26923	5.1	5	100	0.577	2
225	1	63	2015-04-13 14:03:58	2015-04-23 10:29:05	9.85078	90	1	0	1	1	0	0	2	136	86	11.85	9.5	1.3	4.2	136	193	12.4	0.91	3.75		15.6								5.8	4.3	80	0	0	1	0	0	2	5.375	5.2	5	160	0.804	2
210	0	77	2018-10-06 15:22:23	2018-10-12 11:11:53	5.82604	10	0	0	0	1	0	0	1	147	100	7.18	4.34	1.97	4.64	139	333	13	0.98	5.48	39.1	15.6	2.15	12	3	9	37.7	10	23	5.9	4.3	63	1	0	1	0	1	2	6.8254	5.6	5	100	0.605	3
209	1	50	2018-11-09 15:29:57	2018-11-18 10:39:37	8.79838	10	1	0	0	0	0	0	0	123	78	7.86	6.3	1.18	4.5	141	229	13.1	0.99	3.23	29.5	16.3	0.2	14	6	8	41.7	11	8	4.8	4.3	53	1	0	1	0	0	2	8.11321	5.7	5	100	0.802	3
227	1	63	2016-06-18 13:10:49	2016-06-21 11:04:07	2.91201	60	1	0	0	0	1	0	2	158	73	7.31	4.8	1.5	4.56	139	232	11.9	0.89	2.98		15.2		5	2	3	42.1	12	14	10.8	4.3	69	0	1	1	1	0	2	6.23188	5.9	5	180	0.656	3
214	1	53	2018-02-25 07:34:48	2018-03-02 13:46:55	5.25841	2	1	1	1	0	0	0	2	150	90	7.74	6.52	1.02	5	156	224	12.8	0.98	3.7	32.7	16.5	0.33	12	5	7	35.8	13	19	11.4	4.3	51	1	1	1	0	0	2	8.43137	9.3	5	80	0.842	4
236	1	67	2016-06-19 17:14:01	2016-06-28 12:09:45	8.7887	1	0	0	0	1	0	0	2	132	77	8.64	7.5	0.8	4.83	144	245	13.4	1.03	4.13		16.5		13	4	9	35.7	8	15	4.6	4.4	54	0	0	1	0	0	2	8.14815	3.5	5	180	0.873	1
230	1	75	2018-03-09 14:30:21	2018-03-19 10:32:43	9.83498	30	1	0	1	1	0	0	0	138	70	6.89	4.92	1.29	4.16	136	213	14.1	1.11	3.98	33.8	16	1.24	16	7	9	38.2	16	17	6.8	4.4	65	0	0	1	0	0	2	6.76923	4.4	5	120	0.715	1
231	0	58	2017-12-04 16:03:51	2017-12-19 10:50:27	14.7824	1	0	0	0	0	0	0	2	115	76	7.81	6.57	0.83	4.49	124	252	12.7	0.97	4.65	30.6	15.8	1.95					108		10.3	4.4	55	1	0	1	0	1	2	8	4.4	5	170	0.842	1
233	1	67	2017-01-09 15:30:48	2017-01-22 10:20:01	12.7842	7	0	0	0	1	0	0	0	134	84	8.5	6.61	1.45	5.19	158	241	14.6	1.14	3.83	38.8	16.5		11	4	7	42.9	18	17	7.2	4.4	50	1	0	1	0	0	2	8.8	4.4	5	150	0.778	1
242	1	69	2017-11-06 09:59:48	2017-11-09 11:01:50	3.04308	30	1	1	0	1	1	0	0	127	95	8.9	4.87	3.24	5.23	170	201	12.4	0.92	3.23	31.2	17.1		19	7	12	46.6	26	31	7.1	4.4	60	0	1	1	1	0	2	7.33333	4.4	5	150	0.547	1
234	1	77	2016-09-07 16:31:01	2016-09-14 10:29:36	6.74902	10	0	0	0	1	0	0	1	183	74	6.08	4.05	1.43	4.18	129	222	13.2	0.98	3.9		16.4		12	5	7	36.7	9	20	3.8	4.4	67	1	0	1	0	1	2	6.56716	4.5	4	100	0.666	2
237	1	75	2016-06-19 13:26:11	2016-06-28 11:00:45	8.899	3	1	1	1	0	0	0	0	134	71	6.31	5.1	0.8	4.19	140	180	13	0.99	4.57		15.2		7	4	3	38.3	9	22	4.8	4.4	51	1	1	1	0	0	2	8.62745	4.7	5	100	0.813	2
238	1	66	2016-06-01 03:48:45	2016-06-08 09:09:43	7.22289	4	1	0	0	0	1	0	2	135	86	8.15	6.1	1.5	4.54	136	257	13.8	1.06	3.77		16.4	0.55	9	4	5	37.7	16	14	8.6	4.4	73	0	0	1	0	0	2	6.0274	5.5	5	90	0.754	3
240	1	71	2016-01-21 13:25:56	2016-02-01 13:28:31	11.0018	10	0	0	0	0	0	0	2	123	63	5.95	3.34	1.87	4.23	128	199	15	1.17	2.88	38.4	16.8	1.03	10	4	6	38.7	30	34	9.7	4.4	51	1	0	1	0	0	2	8.62745	5.5	5	180	0.562	3
232	0	82	2017-04-11 14:28:08	2017-04-21 10:35:52	9.8387	30	1	0	0	1	0	0	1	132	76	7.25	4.92	1.53	3.38	106	282	12.7	0.95	5.55	33.6	16.2		7	2	5	37.7	12	22	4.5	4.4	65	0	1	1	0	0	2	6.76923	5.7	5	100	0.679	3
235	1	69	2016-08-30 17:32:07	2016-09-12 10:06:33	12.6906	7	1	1	1	1	0	0	1	165	70	9.26	6.2	2	4.81	140	216	13.2	0.98	3.27		17.8		6	3	3	37	15	21	5	4.4	66	1	0	1	0	0	2	6.66667	6	5	150	0.674	3
229	1	72	2018-10-22 12:01:38	2018-10-29 13:48:01	7.07388	15	1	1	1	0	1	0	0	118	85	4.53	2.39	1.45	3.92	133	141	12.6	0.94	3.25	39.6	16.5	0.24	20	14	6	36.7	4	15	7.4	4.4	48	0	0	1	0	0	2	9.16667	6.9	5	100	0.527	4
239	1	68	2016-04-02 14:48:39	2016-04-13 10:46:33	10.8319	7	1	1	1	0	1	0	2	134	68	7.49	5.8	1.2	3.88	123	281	13.3	1.05	3		16.2		14	6	8	29.5	15	18	12.1	4.4	80	1	0	1	0	0	2	5.5	7	5	110	0.772	4
241	1	71	2017-12-09 21:19:50	2017-12-14 10:49:50	4.5625	10	0	0	0	0	0	0	1	152	80	6.07	3.39	2.19	4.41	132	167	12.8	0.98	3.81		16.1	0.32	13	5	8	36.7	12	20	4.9	4.4	81	0	1	1	1	0	2	5.4321	7.2	5	80	0.558	4
252	0	76	2015-05-26 10:41:22	2015-06-03 10:19:10	7.98458	90	1	0	0	0	0	0	0	132	74	4.42	2.4	1.2	3.02	91	169	13.2	0.99	3.98		17		10	4	6	29.8	13	22	4.7	4.5	43	0	0	1	0	0	2	10.4651	3.6	5	100	0.535	1
244	1	77	2017-10-08 01:59:11	2017-10-17 10:44:56	9.3651	8	1	1	1	0	0	0	0	166	88	7.09	5.38	1.18	5.2	115	110	14.2	1.1	2.63	36	15.3	1.93	8	3	5	31.7	9	21	4.9	4.5	86	1	0	1	0	0	2	5.23256	4.5	5	100	0.76	2
246	1	58	2017-07-14 14:12:49	2017-07-21 10:35:09	6.84884	10	1	1	1	1	0	0	1	146	79	6.86	4.82	1.48	5.05	151	244	11.9	0.88	4.57	32.6	17.1	0.28	8	4	4	41.7	29	21	4.5	4.5	72	1	0	1	0	0	2	6.25	4.5	5	100	0.703	2
251	1	72	2015-07-14 16:43:15	2015-07-27 10:09:54	12.7268	10	0	0	0	0	0	0	2	179	82	9.48	6.35	2.1	4.44	128	342	12.8	0.95	3.61		17.5		6	2	4	39.3	19	26	4.6	4.5	71	1	1	1	0	0	2	6.33803	4.5	5	100	0.669	2
248	1	53	2016-06-23 21:44:57	2016-07-01 14:43:40	7.70744	15	1	1	1	0	0	0	1	128	84	6.78	4.7	1.4	4.53	136	180	13.5	1.04	2.54		19.3		8	3	5	32.8	25	18	7.1	4.5	64	0	0	1	0	0	2	7.03125	4.7	5	100	0.696	2
249	1	74	2016-05-28 21:37:38	2016-06-08 10:16:06	10.5267	60	0	0	0	0	0	0	0	131	81	7.31	5.1	1.7	3.78	132	181	14.3	1.11	4.83		15.2		9	4	5	32.7	8	13	5.2	4.5	60	1	0	1	0	0	2	7.5	4.9	5	100	0.697	2
245	1	83	2017-07-23 15:31:08	2017-07-29 10:27:03	5.78883	7	1	0	0	0	0	0	1	134	80	6.24	4.05	1.56	4.51	142	176	13	0.99	3.54	39.6	16.7	0.55	22	8	14	37.3	33	29	4.4	4.5	70	1	0	1	0	0	2	6.42857	6.4	5	100	0.648	3
247	0	80	2016-12-12 17:20:34	2016-12-26 10:23:15	13.7102	6	1	0	1	1	0	0	1	152	94	6.08	4.06	1.46	4.15	135	167	12.8	0.96	3.96	29.5	16.3		5	3	2	35.6	36	48	13	4.5	38	1	0	1	0	1	2	11.8421	6.9	5	100	0.667	4
250	0	80	2016-05-16 17:35:55	2016-05-26 09:49:30	9.6761	0.5	1	0	0	1	0	0	1	166	87	9.24	7.1	1.3	3.74	111	238	12.9	0.97	4.27		15.9		13	4	9	36.7	18	26	5.2	4.5	51	1	0	1	0	0	2	8.82353	7.5	5	100	0.766	4
243	1	84	2018-04-12 12:43:29	2018-04-19 11:44:59	6.95937	60	0	1	1	1	0	0	1	146	83	4.99	3.71	0.68	3.28	111	330	13	1	6.22	34.1	16.1	1.69	11	5	6	27.9	6	16	4	4.5	70	1	0	1	0	0	2	6.42857		5	120	0.744
273	1	66	2016-02-24 15:45:34	2016-03-05 10:09:14	9.76644	7	1	0	0	0	0	0	2	127	72	5.93	4.3	1.1	4.67	144	214	12.3	0.95	3.83	39	15.8		9	3	6	42	21	28	6.7	4.6	63	1	0	1	1	0	2	7.30159	4.4	5	80	0.733	1
254	1	58	2018-10-08 16:24:39	2018-10-13 11:36:54	4.80017	30	0	1	1	0	0	0	0	137	97	11.25	9.02	1.1	4.4	138	310	12.9	0.97	5.5	37.5	15.9	0.37	9	4	5	40.5	31	17	14.3	4.6	53	1	0	1	0	0	2	8.67925	4.6	5	60	0.802	2
256	1	27	2018-07-18 15:10:53	2018-07-24 12:10:15	5.87456	60	1	0	1	0	0	0	0	112	60	7.16	4.55	2.06	5.62	166	140	12.8	0.99	3.51	42.5	15.4	0.21					32		5.1	4.6	96	0	0	1	0	0	2	4.79167	4.6	5	100	0.635	2
261	1	85	2017-04-13 19:04:31	2017-04-24 10:09:12	10.6283	7	0	1	1	0	0	0	0	163	97	5.18	2.74	1.51	4.17	142	170	14.1	1.09	5.09	34.3	15.6	2.48	17	6	11	34.7	14	24	5	4.6	68	1	0	1	0	0	2	6.76471	4.6	5	100	0.529	2
262	1	84	2017-03-23 16:48:38	2017-03-31 11:06:53	7.76267	10	1	0	0	0	0	0	1	136	82	4.76	2.33	1.76	3.83	116	131	13.9	1.07	2.75	40.2	16	3.12					23	26	6.9	4.6	88	1	0	1	0	0	2	5.22727	4.6	5	100	0.49	2
269	1	73	2015-03-29 14:21:29	2015-04-10 10:28:38	11.8383	1	1	0	0	0	0	0	1	142	90	10.99	9.5	0.8	4.02	128	537	14.3	1.09	4.36		14.2		19	7	12	35.3	17	20	6.1	4.6	54	0	0	1	0	0	2	8.51852	4.6	5	80	0.861	2
270	1	53	2014-11-30 22:14:38	2014-12-11 10:14:28	10.4999	10	1	0	0	0	0	0	0	110	68	9.19	6.9	1.4	4.82	148	299	14.6	1.12	5.8		16.5		5	2	3	34.4	18	24	6.8	4.6	63	0	0	1	0	0	2	7.30159	4.6	5	80	0.747	2
260	1	65	2017-06-13 18:16:10	2017-06-25 09:46:42	11.6462	4	1	1	1	1	0	0	1	168	78	5.64	3.3	1.8	4.25	135	143	13	0.98	2.87	33.7	15.9		31	11	20	39.4	34	22	4.7	4.6	79	1	1	1	0	0	2	5.82278	4.9	5	80	0.585	2
266	1	82	2015-11-05 14:45:42	2015-11-09 15:26:30	4.02833	5	1	0	1	1	0	0	2	160	78	8.34	6.2	1.3	4.13	126	108	14.9	1.16	1.93	39	18.7								5.6	4.6	73	1	1	1	0	1	2	6.30137	4.9	5	200	0.742	2
259	1	83	2017-08-18 14:07:43	2017-08-24 14:03:24	5.997	5	0	1	0	0	0	0	0	141	81	5.65	2.4	2.3	4.18	125	180	13	0.99	3.44	40.3	15.1	0.75	9	3	6	36.8	8	10	5.6	4.6	60	0	0	1	0	1	2	7.66667	5	5	100	0.422	2
265	1	73	2016-01-29 14:00:37	2016-02-04 10:28:00	5.85235	15	1	0	0	0	0	0	0	108	77	4.5	3.2	0.9	4.09	124	144	13	1.02	2.66	34.9	17.2		15	6	9	33.7	18	19	4.9	4.6	84	1	0	1	0	0	2	5.47619	5	5	100	0.721	2
263	1	77	2016-11-17 01:27:09	2016-11-25 13:01:27	8.48215	2	0	0	0	0	0	0	0	109	55	7.07	5.22	1.21	4.81	146	238	12.8	0.96	4.23	32.8	16.9	1.34	9	3	6	31	9	18	5.1	4.6	112	1	0	1	0	0	2	4.10714	5.1	5	100	0.739	2
253	1	72	2019-01-05 16:50:51	2019-01-30 10:21:25	24.7296	60	0	1	0	1	1	0	0	100	60	4.18	2.39	1.3	3.52	109	190	13.3	1.04	3.3	32.9	16.4	0.59	8	3	5	34.7	18	37	7.4	4.6	91	1	1	1	0	0	2	5.05495	5.2	4	80	0.571	2
255	1	58	2018-08-17 15:47:18	2018-08-31 10:43:40	13.7891	1	0	0	1	1	0	0	0	182	105	9.17	7.79	0.83	4.78	159	237	13.6	1.07	3.37	29.6	15.4	0.41	59	21	38	40.2	14	13	7.4	4.6	70	0	0	1	0	0	2	6.57143	5.3	5	100	0.849	2
264	1	65	2016-02-25 17:45:20	2016-03-05 10:15:51	8.68786	60	1	0	1	0	0	0	2	123	86	6.49	4.3	1.6	3.6	121	307	11.9	0.91	3.72	32.6	15.7		8	3	5	35.6	10	21	3.1	4.6	64	1	0	1	0	0	2	7.1875	5.4	5	120	0.664	3
268	1	64	2015-06-05 13:08:51	2015-06-15 10:21:18	9.88365	10	1	0	0	0	0	0	0	122	80	6.17	4	1.7	4.31	135	194	13	0.97	3.53		16.4		18	6	12	37.4	39	22	3.7	4.6	65	0	0	1	0	0	2	7.07692	5.6	5	80	0.642	3
257	1	54	2018-03-15 17:33:49	2018-03-22 14:18:42	6.8645	20	1	0	0	0	0	0	0	123	78	6.37	3.86	1.66	4.85	149	203	13	1	2.64	36.6	18.2	0.35	11	5	6	35.7	16	18	5.6	4.6	86	1	0	1	0	1	2	5.34884	5.9	5	80	0.605	3
272	0	86	2016-09-05 19:15:31	2016-09-18 10:39:59	12.642	30	0	0	0	1	0	0	0	150	80	10.82	7.8	2.06	4.04	126	263	12.3	0.89	3.65		16.4		5	2	3	35	16	19	5.1	4.6	65	1	0	1	1	0	2	7.07692	6.5	5	100	0.721	3
267	1	89	2015-07-03 15:05:59	2015-07-14 10:10:27	10.7948	60	1	0	0	0	0	0	2	162	87	6.36	4.9	0.9	3.82	107	146	13.2	0.99	4.23		16.1	7.54	9	4	5	32.3	6	11	5.8	4.6	56	0	0	1	0	0	2	8.21429	7.5	5	180	0.767	4
258	1	83	2017-12-29 22:57:19	2018-01-03 13:29:20	4.60557	60	0	0	0	0	0	0	1	117	58	5.88	3.62	1.42	4.08	125	188	12.8	0.98	3.41	38.9	15.7	0.33	9	4	5	30.8	21	21	6.4	4.6	53	1	0	1	0	1	2	8.67925		5	80	0.616
271	1	79	2016-09-19 21:01:24	2016-09-27 09:38:42	7.5259	5	0	0	0	0	0	0	0	137	96	6.1	3.77	1.54	3.58	111	134	13.7	1.03	2.3		15.3		13	10	3	36.1	2	30	3.1	4.6	57	1	0	1	1	0	2	8.07018		5	80	0.618
278	1	72	2017-02-16 12:41:26	2017-03-01 11:08:27	12.9354	3	0	0	1	1	0	0	2	135	67	7.95	6.68	0.75	4.91	154	202	12.8	0.96	5.5	35.2	14.8		11	4	7	45.6	20	17	6	4.7	82	1	0	1	0	0	2	5.73171	4.3	5	120	0.841	1
282	1	77	2016-04-23 14:13:00	2016-04-29 11:20:58	5.88053	10	1	0	1	0	0	0	2	160	90	5.3	2.8	1.7	4.11	124	198	12.5	0.94	4.52		16		5	2	3	38.5	23	23	5.7	4.7	78	0	0	1	0	0	2	6.02564	4.6	5	100	0.531	2
274	1	62	2019-03-09 15:09:24	2019-03-17 10:18:08	7.79773	10	1	0	1	1	1	0	0	128	85	6.22	2.72	2.89	4.58	140	142	12.8	0.99	2.68		16.9	0.25	14	5	9	40.6	21	19	6.6	4.7	65	1	0	1	0	1	2	7.23077	4.7	5	100	0.436	2
276	1	90	2017-05-31 19:49:59	2017-06-07 10:31:20	6.61205	6	0	0	0	0	0	0	0	136	76	5.57	4.33	0.69	3.89	112	195	13.5	1.03	4.24	34.8	16.1						34	18	4.8	4.7	63	1	0	1	0	1	2	7.46032	4.7	5	50	0.777	2
277	1	67	2017-05-27 13:37:37	2017-06-06 10:38:39	9.87572	9	1	1	1	0	0	0	0	130	92	5.98	4.1	1.3	4.55	143	182	13.1	0.98	3.26	32.7	16		8	3	5	41.6	42	22	6.1	4.7	60	0	0	1	0	0	2	7.83333	4.7	5	150	0.692	2
280	1	76	2016-05-25 15:00:55	2016-06-07 09:46:01	12.7813	15	1	0	0	0	0	0	1	184	97	6.01	3.59	1.64	4.41	136	206	13.7	1.09	3.19		15.1		16	6	10	35.4	10	20	4.7	4.7	73	1	0	1	0	0	2	6.43836	4.7	5	70	0.597	2
286	1	73	2016-12-01 19:40:01	2016-12-12 09:35:02	10.5799	30	1	0	0	0	0	0	1	142	76	6.38	4.65	1.19	4.39	136	82	14.6	1.12	4.23	34.9	17.3		10	4	6	35.9	30	38	4.5	4.7	79	1	0	1	1	0	2	5.94937	4.7	5	80	0.728	2
281	1	74	2016-05-01 15:04:58	2016-05-10 09:56:49	8.78601	30	0	1	0	0	0	0	0	133	90	5.59	4.8	0.6	4.18	133	201	13.6	1.05	2.49		15.7		18	8	10	40.1	22	31	5.7	4.7	58	1	0	1	0	0	2	8.10345	4.8	5	90	0.854	2
285	1	71	2018-08-15 22:02:34	2018-08-26 11:08:01	10.5455	2	0	1	1	0	0	0	0	134	76	12.98	9.19	2.67	3.73	119	297	13.1	1.02	4.61	37.6	15.5	0.36	5	2	3	30.1	15	19	5.6	4.7	75	1	0	1	1	0	2	6.26667	5	5	100	0.707	2
283	1	69	2015-11-30 17:34:13	2015-12-07 10:21:44	6.69966	5	0	0	0	0	0	0	0	122	73	9.04	6.1	2.1	4.5	135	181	13	0.97	3.36	34.5	14.8	1.16	13	5	8	36.8	12	15	3.7	4.7	65	1	0	1	0	0	2	7.23077	5.4	5	80	0.679	3
279	1	80	2017-01-20 13:39:19	2017-01-26 10:30:40	5.86899	2	0	0	0	1	1	0	0	152	79	9.39	7.92	1	3.9	124	266	13.2	1	4.86	35.9	14.7		11	5	6	36	17	16	9.7	4.7	66	1	1	1	0	0	2	7.12121	5.7	5	100	0.844	3
275	1	61	2019-01-17 13:12:06	2019-01-22 12:32:46	4.97269	30	1	0	0	0	0	0	0	148	86	4.36	3.23	0.64	3.95	120	189	12.5	0.93	3.76		15.7	0.29	14	5	9	35.4	12	16	4.1	4.7	62	1	1	1	0	0	2	7.58065	6.6	5	60	0.74	4
284	1	71	2015-06-02 13:42:04	2015-06-07 12:10:47	4.93661	10	0	0	0	0	0	0	1	124	65	10.96	8.87	1.25	4.26	136	235	15	1.17	2.49		12.2		38	12	26	36.9	12	22	2.9	4.7	73	0	1	1	0	1	2	6.43836		5	120	0.809
305	1	63	2014-12-23 09:52:54	2014-12-28 10:37:13	5.03078	30	1	0	0	0	0	0	0	144	88	9.1	6.2	1.8	4.66	150	226	14	1.08	4.55		16		14	6	8	36.5	17	20	5.2	4.8	69	0	1	1	0	0	2	6.95652	3.9	5	100	0.676	1
299	1	72	2016-02-29 11:10:22	2016-03-10 10:08:40	9.95715	14	1	1	0	1	0	0	2	158	86	5.61	4.1	0.8	4.03	128	239	12.1	0.93	4.74	38.7	15.1		15	6	9	32.8	14	15	4.5	4.8	54	1	0	1	0	0	2	8.88889	4.5	5	140	0.723	2
290	1	79	2018-04-11 08:28:11	2018-04-17 09:47:47	6.05528	15	0	1	0	1	0	0	0	155	88	5.33	3.41	1.28	4.96	150	151	12.8	0.98	3.1	35.3	15.7	0.58	12	5	7	39.4	24	25	5.8	4.8	64	1	1	1	0	0	2	7.5	4.6	5	100	0.64	2
297	1	74	2016-08-17 16:13:59	2016-08-27 10:03:35	9.74278	7	1	1	0	0	0	0	2	155	69	6.65	4.2	1.7	4.08	135	221	12.9	0.95	3.15		15.5		6	2	4	35.4	14	23	4.3	4.8	53	1	0	1	0	0	2	9.0566	4.7	5	80	0.624	2
287	1	79	2019-03-27 14:51:02	2019-04-05 10:24:25	8.81485	60	1	1	1	0	0	0	1	151	78	4.87	2.79	1.56	3.85	123	151	14.1	1.11	2.62		16.9	0.6	13	5	8	31.1	13	21	7.3	4.8	56	0	0	1	0	1	2	8.57143	4.8	4	80	0.573	2
288	1	73	2018-08-25 15:50:29	2018-09-05 10:08:35	10.7626	1	1	0	1	1	0	0	0	106	57	6.27	4.34	1.49	3.85	117	274	13.6	1.06	4.96	40.6	15.7	1.25	13	5	8	37.6	10	13	5.9	4.8	74	1	0	1	0	0	2	6.48649	4.8	5	80	0.692	2
292	1	64	2017-10-25 15:03:08	2017-11-02 14:59:49	7.9977	3	0	1	1	0	0	0	0	153	63	10.2	8.62	0.76	4.35	143	203	12.1	0.9	3.35	27.6	16.1	0.3	11	4	7	33.3	15	27	5.9	4.8	67	1	0	1	0	0	2	7.16418	4.8	5	100	0.845	2
293	1	89	2017-03-07 16:18:41	2017-03-23 10:05:50	17.7411	7	1	0	1	1	1	0	2	150	65	5.79	4.24	1	3.93	119	247	12.7	0.95	3.9	27.2	16	1.55	8	3	5	38.4	12	17	5.9	4.8	132	1	0	1	0	0	2	3.63636	4.8	3	150	0.733	2
300	0	81	2016-02-14 12:57:45	2016-02-23 11:14:29	8.92829	4	1	0	1	0	0	0	0	162	89	5.08	3.1	1.5	4.3	136	206	12.7	0.99	4.4	29.7	15.6		8	2	6	38.5	12	17	4.8	4.8	66	1	0	1	0	0	2	7.27273	4.8	5	100	0.604	2
302	1	67	2015-07-17 12:03:51	2015-07-26 09:41:22	8.90105	30	1	1	1	0	0	0	1	129	82	5.2	2.09	2.48	4.3	140	204	13.2	0.99	2.84		17.3		11	5	6	44.1	13	20	4.8	4.8	71	0	0	1	0	0	2	6.76056	4.8	5	80	0.402	2
304	1	67	2015-02-12 01:27:45	2015-03-02 10:57:17	18.3955	1	1	1	1	0	0	0	1	175	89	8.92	5.5	2.4	4.14	134	190	14.1	1.09	4.11		15.5								6.6	4.8	62	0	1	1	0	0	2	7.74194	4.8	5	150	0.622	2
294	1	62	2017-06-30 14:38:59	2017-07-10 10:32:22	9.82874	3	1	0	0	1	0	0	0	142	81	8.55	6.06	1.86	4.42	131	222	13.6	1.04	2.66	29.2	16.5								5.2	4.8	61	1	0	1	0	1	2	7.86885	4.9	5	100	0.708	2
289	1	73	2018-05-16 14:29:56	2018-06-04 09:39:31	18.7983	6	1	0	0	1	0	0	1	143	75	6.77	4.42	1.31	4.71	150	181	13.7	1.07	3.08	37	16.2	0.48	19	7	12	39.3	27	22	5.5	4.8	79	1	1	1	0	1	2	6.07595	5.1	5	80	0.652	2
296	1	62	2017-04-27 15:54:17	2017-05-07 10:41:18	9.78265	7	1	1	0	0	0	0	0	168	61	9.88	6.05	2.73	4.93	145	312	13	0.98	4.03	32.9	17.1		8	3	5	39.7	11	19	4.7	4.8	77	1	0	1	0	0	2	6.23377	5.1	5	100	0.613	2
298	1	71	2016-03-07 08:55:18	2016-03-15 11:04:14	8.08954	30	0	0	0	1	0	0	2	122	70	10.37	8.2	1.6	4.21	121	212	13.3	1.05	3.19		14.8		13	5	8	32.8	65	52	4.8	4.8	62	1	0	1	0	0	2	7.74194	5.1	5	200	0.792	2
291	1	86	2017-12-07 12:03:29	2017-12-18 12:29:10	11.0178	7	0	0	0	1	0	1	1	116	81	5.25	3.36	1.32	4.2	123	201	12.7	0.97	3.29		16.5	0.83	19	7	12	34.4	9	21	7.6	4.8	73	0	0	1	0	1	2	6.57534	5.4	5	100	0.641	3
307	1	87	2018-01-23 16:03:48	2018-02-05 11:02:06	12.7905	1	0	1	1	1	0	0	0	112	62	5.71	4.22	0.73	4.09	129	157	12.8	0.98	4.38	32.4	15.2	1.02	19	8	11	35.8	11	21	5.2	4.8	93	1	0	1	1	1	2	5.16129	5.9	5	100	0.738	3
306	1	75	2018-03-21 16:27:29	2018-04-03 15:45:49	12.9711	7	1	1	1	0	0	0	0	138	81	4.19	2.74	1.04	4.03	131	250	14.1	1.11	2.69	36.2	19.7	0.81	12	5	7	43.5	8	18	9.1	4.8	55	1	0	1	1	0	2	8.72727	6.4	5	100	0.654	3
303	1	93	2015-05-28 20:55:33	2015-06-09 09:52:58	11.5399	3	0	0	1	0	0	0	2	146	71	12.03	9.8	1.6	4.13	129	139	13.7	1.04	3.98		16.8		22	7	15	37.4	6	23	6.6	4.8	61	0	0	1	0	1	2	7.86885	7.3	5	150	0.812	4
301	1	82	2015-11-25 16:28:36	2015-12-04 10:14:43	8.74036	20	0	0	0	1	0	0	0	172	81	12.53	11.1	1.3	4.25	119	273	13.1	0.98	3.23	39.2	16.4		5	2	3	39.1	19	21	5.1	4.8	81	0	0	1	0	0	2	5.92593	7.7	5	50	0.883	4
295	1	75	2017-05-10 21:11:22	2017-05-13 10:27:48	2.55308	1	1	1	1	1	0	1	2	150	80	5.36	3.93	0.96	3.07	91	214	13	0.98	3.97	44.7	14.9		13	6	7	29.8	7	14	4.7	4.8	74	1	0	1	0	1	2	6.48649	8.2	5	180	0.734	4
321	0	69	2017-05-29 17:49:53	2017-06-12 09:32:18	13.6545	4	1	0	0	1	0	0	1	155	75	4.85	4.05	0.61	3.89	111	239	19.2	1.6	4.71	37.4	16.9	0.99	11	4	7	30.8	16	17	5	4.9	51	1	0	1	0	0	2	9.60784	2.8	5	80	0.835	1
330	1	82	2018-05-15 13:00:35	2018-06-01 12:12:10	16.9664	1	0	0	1	0	0	1	2	127	73	4.64	2.74	1.19	4.36	142	128	13.2	1.02	4.15	42.4	15.3	0.65	10	4	6	36.5	22	27	5.7	4.9	92	1	0	1	1	0	2	5.32609	3.6	5	200	0.591	1
311	1	71	2018-09-13 13:23:39	2018-09-18 09:59:28	4.85821	20	0	1	1	0	0	0	0	132	84	5.7	3	1.93	4.03	123	425	13.4	1.05	4.08	37.1	15.6	0.39	27	10	17	35.6	106	210	6.6	4.9	72	1	0	1	0	0	2	6.80556	3.9	5	100	0.526	1
313	1	76	2018-04-19 20:03:26	2018-04-28 11:24:54	8.63991	3	1	0	0	1	0	0	0	136	73	6.14	4.38	1.11	3.9	129	121	12.9	0.99	4.99	34.8	15	0.98	12	6	6	33.6	8	14	4.6	4.9	90	1	0	1	0	0	2	5.44444	4.3	5	100	0.713	1
325	1	56	2015-10-28 21:56:21	2015-11-09 10:02:25	11.5042	3	1	0	0	0	0	0	0	141	85	8.11	6.3	1.4	5.07	147	222	12.4	0.91	3.39	35.8	15.1		8	3	5	39.2	26	20	4.2	4.9	76	1	1	1	0	0	2	6.44737	4.3	5	80	0.772	1
310	1	72	2018-09-17 13:39:04	2018-09-30 10:32:27	12.8704	15	1	1	1	0	0	0	0	131	70	4.29	2.35	1.49	3.62	118	137	13.5	1.03	3.17	29.6	16.7	2.21	7	2	5	36.4	17	26	4.4	4.9	71	1	0	1	0	1	2	6.90141	4.9	5	100	0.548	2
314	1	56	2018-04-14 14:04:16	2018-04-19 14:22:08	5.01241	3	1	1	1	0	0	0	0	169	110	7.01	5.45	1.09	4.66	149	190	14	1.1	3.64	39.2	15.4	0.54	11	5	6	40.7	14	20	5.2	4.9	63	1	1	1	0	0	2	7.77778	4.9	5	80	0.778	2
315	1	72	2018-03-11 12:50:20	2018-03-19 11:54:03	7.96091	3	0	0	1	1	0	0	0	130	85	12.41	9.64	2.13	4.73	111	376	14.8	1.17	4.01	30.6	15.3	0.45					34		5.8	4.9	86	1	0	1	0	0	2	5.69767	4.9	5	100	0.776	2
317	1	77	2017-11-01 15:05:41	2017-11-10 10:58:06	8.82807	4	1	0	0	0	0	0	0	109	77	6.45	4.74	1.15	4.57	143	172	13.4	1.02	3.81	38	16.4	7.86	21	7	14	39.4	39	34	4.3	4.9	80	1	0	1	0	0	2	6.125	4.9	5	100	0.735	2
318	1	77	2017-10-31 16:19:57	2017-11-08 13:37:54	7.88747	15	1	1	0	0	0	0	0	152	112	9.54	8.67	0.3	3.98	129	147	13.8	1.07	4.32	38.5	14.9	1.3	18	9	9	31.2	11	19	7	4.9	68	1	1	1	0	0	2	7.20588	4.9	5	100	0.909	2
320	1	74	2017-05-30 22:19:49	2017-06-13 11:19:08	13.5412	1	1	1	1	1	0	0	1	139	75	7.63	5.17	1.83	4.42	133	203	14.7	1.14	2.82	37.2	16.6	0.69	15	7	8	35.9	22	27	4.3	4.9	75	1	0	1	0	1	2	6.53333	4.9	3	60	0.678	2
322	1	60	2017-01-18 13:36:23	2017-01-29 09:55:57	10.8469	5	1	1	1	1	1	0	0	150	79	7.85	4.56	2.6	4.67	142	282	14.1	1.09	3.2	33.8	15.6		11	4	7	40.7	31	25	5.5	4.9	54	0	0	1	0	0	2	9.07407	4.9	5	70	0.58	2
326	1	68	2015-04-04 12:40:48	2015-04-17 10:43:09	12.9183	10	1	1	0	1	0	0	0	206	108	8.4	5.49	1.97	4.37	134	187	12.9	0.97	5.22		12.9		17	6	11	36.3	15	24	3.7	4.9	70	0	0	1	0	0	2	7	4.9	4	40	0.654	2
328	1	51	2014-12-17 16:07:19	2014-12-29 10:08:07	11.7506	90	1	0	1	0	0	0	0	152	78	9.51	8.6	0.6	4.84	155	311	14.1	1.09	2.26		16.8		10	4	6	40.5	33	26	4.8	4.9	62	0	0	1	0	0	2	7.90323	4.9	5	80	0.903	2
332	1	82	2016-11-18 17:00:53	2016-11-25 10:51:20	6.74337	2	0	0	1	0	0	0	2	133	88	7.78	5.7	1.4	4.05	133	212	13.2	1	4.37	32.7	16.5								6.7	4.9	59	1	0	1	1	1	2	8.30508	4.9	5	130	0.729	2
323	1	45	2017-01-03 15:54:52	2017-01-10 10:24:01	6.77024	10	1	1	0	0	0	0	1	105	73	7.49	5.32	1.75	5.26	162	232	13.7	1.05	4.52	30.9	15.3		8	3	5	35.2	15	15	4.7	4.9	78	1	0	1	0	0	2	6.28205	5.3	5	80	0.71	2
324	1	79	2015-12-09 16:23:06	2015-12-18 11:45:27	8.80719	1	0	0	0	0	0	0	2	145	86	4.05	2.3	1	4.51	141	260	12.9	0.96	3.98	38.32	15.9		12	4	8	34.9	20	15	4.6	4.9	63	0	0	1	0	0	2	7.77778	5.4	5	70	0.579	3
312	0	80	2018-06-27 01:09:35	2018-07-04 15:10:39	7.58407	2	1	0	0	0	0	0	1	161	78	8.42	5.44	2.46	3.66	114	381	13.2	1.03	3.27	30.4	15.6	0.52	29	11	18	37.2	16	23	5.3	4.9	43	1	0	1	0	0	2	11.3953	5.5	5	100	0.646	3
327	1	84	2015-04-02 13:35:28	2015-04-10 09:34:51	7.83291	3	1	0	0	1	0	0	0	135	89	5.4	3.6	1.3	4.2	124	201	13.9	1.05	3.3		15.7								6.4	4.9	73	0	1	1	0	0	2	6.71233	5.5	5	100	0.668	3
309	1	77	2019-01-06 17:19:39	2019-01-18 13:32:59	11.8426	15	1	0	0	1	0	0	1	153	76	5.02	1.42	2.54	3.74	118	184	16.6	1.37	2.65	48.8	18.6	0.5					26		5.5	4.9	84	1	1	1	0	0	2	5.83333	5.8	5	80	0.282	3
331	1	80	2017-01-01	2017-01-10 10:27:05	6.74839	2	1	1	0	1	1	0	0	122	77	7.04	4.73	1.79	4.2	134	168	13.4	1.02	3.52	35.8	16.2		15	6	9	35.2	16	23	5.4	4.9	69	1	0	1	1	0	2	7.10145	6.2	5	100	0.672	3
329	1	34	2019-01-11 17:18:56	2019-01-22 12:41:58	10.8077	2	0	0	0	0	1	0	0	115	71	6.51	3.8	2.18	4.67	142	150	15.2	1.2	4.17		17	0.5	10	3	7	36	14	15	13.9	4.9	45	1	1	1	1	0	2	10.8889	6.4	5	100	0.583	3
308	0	73	2019-03-20 20:57:53	2019-03-29 14:30:33	8.73102	10	1	0	0	1	0	0	0	164	98	7.05	4.14	1.56	4.3	133	304	12.4	0.97	5.44		17	0.99	9	3	6	35.3	13	15	6.2	4.9	49	1	0	1	0	0	2	10	6.5	5	100	0.588	3
316	1	53	2017-12-29 22:05:34	2018-01-05 13:50:59	6.65654	30	0	1	0	0	0	0	0	114	76	9.05	7.85	0.87	4.68	147	214	12.5	0.95	4.32	31	16.8	0.18	7	3	4	30.3	9	13	3.6	4.9	64	1	1	1	0	0	2	7.65625	6.7	5	100	0.868	4
319	1	74	2017-09-23 14:06:03	2017-10-01 11:46:32	7.90311	4	0	1	0	0	0	0	0	137	82	7.89	5.35	1.06	3.95	125	171	14.8	1.17	2.7	43.5	15.5	20	13	5	8	37.5	7	16	4.5	4.9	71	1	0	1	0	1	2	6.90141		5	100	0.679
341	1	87	2015-11-18 15:38:29	2015-12-02 10:09:03	13.7712	14	1	0	0	0	0	0	2	156	82	7	5	1.4	4.21	132	208	13.6	1.03	4.25	40.2	15.4		13	6	7	31.4	14	19	7.6	5	105	1	1	1	0	1	3	4.7619	4.9	5	150	0.712	2
333	1	53	2019-03-05 14:03:39	2019-03-15 11:01:47	9.8737	10	0	1	0	0	0	0	1	104	61	10.87	9.02	1.15	4.68	148	274	12.5	0.97	4.14		16.3	0.23	12	4	8	32.2	10	12	4.1	5	84	1	0	1	0	1	3	5.95238	5	5	70	0.829	2
334	0	69	2018-05-22 12:34:19	2018-06-08 10:48:07	16.9263	7	1	0	0	1	1	0	0	137	80	9.91	4.76	4.1	4.41	139	255	12.7	0.97	4.04	35.4	17.3	0.63	9	4	5	40.4	37	42	5.8	5	51	1	0	1	0	0	3	9.80392	5	5	60	0.48	2
336	0	81	2017-06-09 11:11:41	2017-06-17 09:50:52	7.94388	7	0	0	0	1	0	0	0	140	64	5.82	3.81	1.47	3.62	116	203	14.5	1.13	3.16	31.8	17.1		11	4	7	31.9	8	17	5.8	5	46	1	0	1	0	0	3	10.8696	5	5	80	0.654	2
339	1	56	2016-04-11 11:15:01	2016-04-19 10:24:30	7.96492	15	1	0	0	0	0	0	0	137	92	9.31	6.48	1.86	4.7	146	289	15.1	1.23	2.32	36.8	15.7		7	3	4	40.5	15	15	9	5	65	1	0	1	0	0	3	7.69231	5	5	100	0.696	2
343	1	69	2015-02-15 14:48:26	2015-02-18 14:03:22	2.9687	3	0	0	0	0	0	0	1	109	75	9.744	6.8	1.6	3.59	115	240	12.8	0.96	4.07		15.6								5	5	95	0	0	1	0	0	3	5.26316	5	5	80	0.7	2
344	1	92	2015-04-21 15:46:31	2015-05-11 10:20:26	19.7736	7	0	0	0	1	0	0	1	138	82	6.29	3.91	1.76	4.57	145	202	14.4	1.09	3.98		15.6	0.8	10	4	6	38.1	17	22	6.2	5	85	0	0	1	1	0	3	5.88235	5	5	100	0.622	2
340	1	65	2015-12-01 09:26:14	2015-12-08 09:52:26	7.01819	1	0	0	1	0	0	0	2	157	91	11.28	10.3	0.6	4.49	143	275	12.7	0.94	3.48	30.4	16.4		16	6	10	35.7	18	20	4.7	5	55	0	1	1	0	0	3	9.09091	5.4	5	140	0.916	3
342	1	70	2015-08-08 18:39:13	2015-08-18 09:40:38	9.62598	1	1	1	0	1	0	0	0	170	88	11.51	8.6	2.5	4.09	121	180	12.8	0.95	2.61		16.3		14	4	10	34.5	18	18	5.2	5	52	0	0	1	0	0	3	9.61538	5.6	5	120	0.75	3
337	1	71	2017-04-20 14:18:33	2017-04-30 10:33:09	9.84347	7	1	0	1	0	0	0	2	137	76	5.89	4.09	1.16	4.23	137	247	12.8	0.96	3.74	30	15.6		13	5	8	35.9	9	17	4.5	5	78	1	1	1	0	0	3	6.41026	5.8	5	160	0.695	3
338	1	77	2017-04-01 20:35:24	2017-04-10 09:47:28	8.55005	1	0	0	1	1	0	0	0	169	98	7.97	5.77	1.56	4.15	131	114	15	1.17	2.76	36.8	17.3		14	5	9	35.7	32	54	4.4	5	89	1	1	1	0	0	3	5.61798	6.2	5	90	0.724	3
335	1	81	2017-10-24 18:41:55	2017-11-03 10:20:25	9.65174	10	1	0	1	0	0	0	2	150	90	5.73	2.87	2.14	3.76	115	191	12.5	0.93	4.16	43.1	16.8	0.54	10	4	6	32.3	8	20	6.7	5	87	1	0	1	0	1	3	5.74713	6.3	5	150	0.502	3
346	1	86	2018-11-18 16:51:47	2018-11-27 09:57:30	8.7123	4	1	0	0	0	0	0	2	125	73	5.51	3.66	0.91	3.24	98	277	13.5	1.06	3.78	38.9	15.9	1.89	5	2	3	26	11	19	4.8	5.1	67	1	0	1	0	0	3	7.61194	3.1	5	120	0.664	1
352	1	62	2015-05-26 21:07:27	2015-06-02 14:16:11	6.7144	7	1	0	0	0	0	0	0	106	68	9.07	6.94	1.38	4.39	124	195	14.9	1.14	3.52		14.6		8	4	4	35.3	18	13	5.6	5.1	80	0	0	1	0	1	3	6.375	4.6	5	70	0.766	2
349	1	50	2017-04-28 14:44:29	2017-05-22 10:14:28	23.8125	4	1	1	1	0	0	0	0	145	93	17.67	15.71	1.1	4.4	156	266	13.4	1.02	2.89	34.6	16.8		32	13	19	38	8	14	5.6	5.1	60	0	0	1	0	1	3	8.5	4.8	5	80	0.889	2
345	0	73	2019-01-23 15:14:08	2019-01-31 10:01:37	7.78297	7	0	0	0	0	1	0	0	132	70	5.11	3.5	1.12	4.01	116	224	14.8	1.15	3.51		17.5	1.05	6	3	3	35.6	18	26	12.9	5.1	59	1	0	1	0	0	3	8.64407	5.1	5	100	0.685	2
347	1	76	2018-11-17 10:44:38	2018-11-29 09:53:19	11.9644	5	1	1	1	1	0	0	0	168	80	9.77	7.07	1.59	4.04	121	235	13.3	1.04	4.64	40.9	15.3	1.4	10	4	6	37.2	14	17	4.9	5.1	73	1	0	1	0	0	3	6.9863	5.1	5	100	0.723	2
348	1	49	2018-03-16 10:17:39	2018-03-30 10:43:31	14.018	15	1	1	1	1	0	0	0	127	83	9.26	7.36	1.29	4.57	138	352	13.5	1.05	7.94	37.9	16.2	0.29	7	4	3	35.7	21	18	3.1	5.1	91	1	1	1	0	0	3	5.6044	5.1	5	40	0.795	2
351	1	67	2017-01-10 11:30:33	2017-01-26 09:58:20	15.936	30	1	1	0	0	1	1	2	154	76	6.62	4.1	1.9	4.19	125	133	13.1	0.99	5.26	39.5	16.5	1.4	5	2	3	33.3	9	12	10.4	5.1	78	1	0	1	0	1	3	6.53846	5.1	5	170	0.619	2
353	1	84	2017-09-14 10:55:29	2017-09-18 10:52:45	3.9981	30	1	1	1	1	0	0	2	137	70	5.97	2.31	2.51	4.1	128	189	13.4	1.03	3.89	45	16.8	0.78	5	2	3	36.8	10	18	7.6	5.1	82	1	0	1	1	0	3	6.21951	5.1	5	120	0.387	2
350	1	71	2017-03-05 16:00:31	2017-03-16 09:55:03	10.7462	2	0	0	1	1	0	0	2	172	84	11.17	9.29	1.33	4.37	129	201	12.2	0.91	2.97	28.6	18.2		12	5	7	36.1	31	26	7.2	5.1	73	1	0	1	0	0	3	6.9863	5.3	5	150	0.831	2
354	1	63	2017-05-30 00:50:33	2017-06-06 10:37:18	7.40747	1	1	0	1	0	0	0	0	137	77	4.48	2.33	1.22	3.95	131	197	12.8	0.96	3.05	32.7	15.4		20	8	12	36.5	7	15	6.3	5.1	56	1	0	1	1	0	3	9.10714	8.1	5	80	0.52	4
362	1	90	2016-04-05 17:57:59	2016-04-13 09:58:48	7.66723	20	0	0	0	0	0	0	2	163	101	7.27	4.6	1.9	4.65	140	215	13.4	1.06	3.26		16.6		12	5	7	34.3	16	20	4.7	5.2	64	1	1	1	0	0	3	8.125	4.9	5	160	0.637	2
363	1	84	2016-01-18 12:14:30	2016-01-26 10:00:58	7.90727	7	1	0	1	0	0	0	1	135	81	6.96	4.7	1.7	3.94	139	160	13.1	0.98	2.54	33.6	16.7		13	6	7	36.5	21	26	4.1	5.2	81	1	0	1	0	0	3	6.41975	4.9	5	70	0.678	2
358	1	64	2017-10-24 13:41:03	2017-11-02 14:16:27	9.02458	15	0	1	1	0	0	0	0	150	93	8.92	5.26	2.5	4.61	149	231	13.9	1.07	3.25	37.7	15.4	0.31	12	6	6	37.4	28	19	4.2	5.2	73	1	0	1	0	0	3	7.12329	5.2	5	70	0.59	2
359	1	59	2017-09-14 13:48:11	2017-09-20 11:10:36	5.89057	6	1	0	1	1	0	0	0	156	90	8.16	5.98	1.53	4.97	151	213	12.4	0.93	2.5	32.9	17	0.5	15	6	9	43.4	26	19	7.3	5.2	70	1	0	1	0	0	3	7.42857	5.2	5	100	0.733	2
360	1	47	2017-01-28 22:09:53	2017-02-05 10:44:01	7.5237	1	0	1	1	0	0	0	1	102	70	17.88	15.73	1.14	5.14	151	330	12.5	0.93	5.52	38.3	15		10	4	6	41.9	8	12	6.8	5.2	75	0	0	1	0	0	3	6.93333	5.2	5	80	0.879	2
361	1	84	2017-01-09 11:06:41	2017-01-22 14:08:29	13.1262	3	0	0	0	1	0	0	2	149	89	8.02	6.36	0.9	3.91	123	197	14.3	1.11	3.35	38	16.3		10	3	7	40	13	18	5.2	5.2	67	1	0	1	0	0	3	7.76119	5.2	5	140	0.793	2
364	1	69	2015-07-01 11:26:30	2015-07-23 10:01:24	21.9409	60	1	0	0	1	1	0	0	166	80	5.72	3.89	1.23	4.45	136	178	12.9	0.96	3.83		17.2		12	4	8	38	13	18	6.8	5.2	51	0	0	1	0	0	3	10.1961	5.2	5	70	0.681	2
365	1	85	2015-02-05 17:43:09	2015-02-13 13:16:58	7.81515	2	1	0	0	1	0	0	0	141	80	6.72	3.9	1.34	4.04	124	197	14.5	1.13	3.9	38.7	14.2		21	8	13	37.6	20	27	5.3	5.2	64	0	0	1	0	1	3	8.125	5.2	5	100	0.581	2
366	1	83	2015-08-03 01:50:34	2015-08-13 09:33:23	10.3214	3	1	0	0	1	0	0	2	126	81	8.14	6.28	1.06	3.6	118	111	13.6	1.03	3.07		16.6	0.72	13	5	8	33.6	20	24	5.2	5.2	85	0	0	1	1	0	3	6.11765	5.3	5	170	0.771	2
355	1	58	2018-07-17 16:07:54	2018-07-24 13:51:32	6.9053	20	1	1	1	0	0	0	1	161	92	7.94	5.12	2.29	4.97	152	245	13.8	1.09	4.14	41.1	15.8	0.29	6	2	4	41.1	17	19	5.2	5.2	64	1	1	1	0	0	3	8.125	5.6	4	100	0.645	3
357	1	69	2017-12-16 21:08:37	2017-12-25 10:30:27	8.55683	1	1	0	1	1	1	0	1	154	92	9.52	5.77	2.71	4.44	140	213	12.7	0.97	4.09	32.7	16.6	0.37	10	4	6	31.2	34	29	6.9	5.2	84	1	1	1	0	0	3	6.19048	5.6	5	100	0.606	3
356	1	66	2018-04-18 17:16:52	2018-04-30 09:56:43	11.6943	30	1	1	0	0	0	0	1	126	83	7.52	5.93	1.27	4.82	155	178	13.5	1.05	2.94	35.2	16.8	0.31	14	5	9	34.9	12	20	3.4	5.2	69	1	0	1	0	1	3	7.53623	6	5	80	0.789	3
373	1	53	2015-06-15 12:25:48	2015-06-24 11:48:46	8.97428	60	1	0	0	0	0	0	1	153	94	6.7	4.2	1.8	4.72	144	171	12.5	0.92	2.44		17.8		14	4	8	41.9	38	23	3.6	5.3	68	1	0	1	0	0	3	7.79412	4.3	5	80	0.627	1
368	1	37	2018-05-25 14:29:19	2018-06-07 10:34:57	12.8372	7	1	1	1	0	0	0	0	105	65	5.84	3.09	2.26	4.64	145	259	12.8	0.98	2.97	36.4	16.8	0.33	7	4	3	41.4	33	28	6.2	5.3	59	1	0	1	0	0	3	8.98305	5.3	5	100	0.529	2
369	1	80	2017-11-02 19:15:35	2017-11-08 13:06:59	5.74403	7	1	0	1	0	0	0	0	113	50	5.08	3.91	0.55	3.83	116	202	12.7	0.95	4.79	33.5	14.5	0.58	16	6	10	36.6	7	15	10.3	5.3	65	1	1	1	0	0	3	8.15385	5.3	5	100	0.77	2
370	0	80	2017-04-22 11:45:19	2017-05-04 10:24:45	11.9441	20	1	0	0	1	0	0	0	127	69	4.84	2.95	1.48	3.88	113	230	13.2	1	4.31	37.4	16.8		6	3	3	36.6	11	18	5.8	5.3	57	1	1	1	0	0	3	9.29825	5.3	5	60	0.609	2
374	1	63	2015-03-24 10:25:00	2015-04-04 10:48:36	11.0164	30	1	0	0	0	0	0	0	111	60	4.86	2.46	1.88	4.06	130	165	13.8	1.04	2.48	42	17.3		8	3	5	38	19	21	5.3	5.3	67	0	0	1	0	0	3	7.91045	5.3	5	60	0.506	2
371	0	79	2015-12-24 10:54:18	2016-01-04 10:31:04	10.9839	15	1	0	0	0	0	0	2	158	77	5.52	4.1	0.7	3.06	94	262	13.3	1	5.3	35.8	16.1		5	2	3	33.4	5	17	6.4	5.3	59	1	1	1	0	0	3	8.98305	5.4	5	160	0.747	3
372	1	53	2015-11-17 22:08:45	2015-12-03 10:54:29	15.5318	12	1	1	0	0	0	0	0	124	69	7.28	5.2	1.4	4.51	137	208	12.9	0.96	2.23	45.3	16.3		11	5	6	37.8	13	16	4.1	5.3	61	1	1	1	0	1	3	8.68852	5.6	5	100	0.721	3
367	1	67	2019-04-15 15:33:11	2019-04-22 10:30:41	6.78993	60	1	1	1	0	0	0	1	108	64	11.08	10.15	0.73	4.07	130	212	14.4	1.15	2.69		16.5	0.99	11	4	7	33.9	7	16	6.6	5.3	55	1	1	1	0	0	3	9.63636	5.8	5	60	0.916	3
382	1	56	2016-01-31 22:27:30	2016-02-06 09:39:37	5.46675	1	1	1	1	0	0	0	0	160	88	10.73	7.6	2.1	4.98	155	174	12.4	0.96	3.77	29.9	15.8		10	4	6	32.2	10	17	4.6	5.4	69	1	1	1	0	0	3	7.82609	3.3	5	100	0.713	1
378	1	59	2018-01-30 21:18:35	2018-02-14 12:41:40	14.641	1	1	0	0	1	1	1	0	182	118	8.57	5.86	1.82	5.71	172	150	13.4	1.04	4.54	35.5	17.4	0.83	14	6	8	36.6	19	18	20.5	5.4	60	1	1	1	0	1	3	9	3.5	5	100	0.684	1
383	0	68	2015-10-27 16:03:32	2015-11-05 10:04:21	8.75057	10	1	0	0	1	0	0	0	125	79	7.29	3.53	2.74	4.19	125	241	13.8	1.05	1.75	38.7	18.2		12	4	8	39.7	9	17	4.8	5.4	61	1	1	1	0	0	3	8.85246	3.8	5	100	0.483	1
376	1	78	2018-06-14 13:46:53	2018-06-27 10:39:24	12.8698	14	0	1	0	1	1	0	2	138	69	5.37	2.79	1.87	4.78	144	225	13.3	1.04	3.52	33.1	13.8	1.01	12	5	7	39.2	16	22	11.3	5.4	83	1	0	1	0	1	3	6.50602	4.8	5	90	0.52	2
375	1	65	2018-11-13 16:05:59	2018-11-26 10:39:45	12.7734	30	1	0	1	1	0	0	1	112	81	7.47	4.92	1.8	4.38	141	254	13.4	1.05	3.38	35.8	14.9	0.16	10	5	5	38.6	14	17	4.6	5.4	80	1	1	1	0	0	3	6.75	5.4	5	100	0.659	3
377	1	67	2018-05-02 15:39:10	2018-05-16 09:39:40	13.7503	7	1	1	1	1	0	0	1	126	72	6.65	5.11	1	4.32	131	147	13.1	1.01	3.61	40.4	16.4	0.21	7	3	4	38.1	28	29	9.5	5.4	59	1	0	1	0	0	3	9.15254	5.4	5	90	0.769	3
379	0	65	2017-11-29 19:52:38	2017-12-13 10:42:20	13.6178	15	1	0	0	0	0	0	0	126	92	7.64	4.43	1.16	4.29	117	232	13.8	1.06	5.08	33.9	16.9		5	2		31	8	21	6.7	5.4	60	0	0	1	0	0	3	9	5.4	4	150	0.58	3
386	1	84	2014-12-23 09:56:59	2015-01-06 10:04:56	14.0055	20	1	0	0	0	0	0	1	140	99	7.31	4.67	1.81	4.8	146	231	13.5	1.03	3.06		15.3		12	4	8	40.4	14	19	5.1	5.4	68	0	0	1	0	0	3	7.94118	5.4	5	80	0.639	3
385	1	72	2015-04-29 17:49:47	2015-05-07 09:41:13	7.66072	10	0	0	0	0	0	0	2	135	75	7.75	5.9	1.4	4.43	133	151	13	0.96	4.18		15.8		18	6	12	36.6	13	16	5.4	5.4	67	0	0	1	0	1	3	8.0597	5.7	5	120	0.763	3
381	1	70	2016-04-22 23:11:15	2016-05-09 14:30:35	16.6384	30	1	0	0	0	0	0	0	122	73	4.21	2.2	1.4	4.29	120	213	13.9	1.08	2.34	39.8	18		7	3	4	37.1	14	22	3.6	5.4	59	1	0	1	0	0	3	9.15254	5.9	5	60	0.533	3
380	1	81	2017-03-18 14:19:23	2017-03-28 10:16:53	9.8316	3	1	0	1	1	0	0	2	135	76	8.81	6.2	1.45	5.03	168	236	12.5	0.93	2.46	35.1	17.9		16	7	9	31.2	9	17	5.2	5.4	53	1	1	1	0	1	3	10.1887	6.3	5	180	0.703	3
384	0	71	2015-06-28 17:16:36	2015-07-10 10:43:50	11.7272	3	1	0	0	1	1	0	1	191	61	7.1	4.5	1.7	3.87	114	130	13.5	1.02	3.61		17.4		13	4	9	32.1	16	19	16	5.4	58	0	1	1	0	0	3	9.31034	6.6	5	100	0.633	4
387	1	83	2015-12-25 15:14:21	2016-01-25 11:14:49	30.8337	30	1	0	0	0	0	1	2	186	79	5.77	3.2	1.8	3.35	110	162	14.4	1.11	3.09	28.7	14.2	2.2	8	4	4	31.8	6	10	7.3	5.4	78	1	0	1	1	1	3	6.92308	9.5	3	80	0.559	4
390	1	78	2018-10-20 21:59:04	2018-10-30 11:15:25	9.55302	4	1	1	0	0	0	1	1	175	96	8.63	4.8	2.7	4.04	124	229	12.7	0.98	3.43	31.4	15.8	1.12	12	4	8	33.6	10	14	9.8	5.5	132	1	1	1	0	0	3	4.16667	4	5	150	0.556	1
392	1	77	2018-04-21 21:26:56	2018-05-02 10:48:24	10.5566	0.25	0	0	1	0	0	0	1	144	88	7.81	6.04	0.82	4.15	135	161	13.1	1.01	3.76	35.9	15.2	1.06	28	11	17	33.1	25	31	4.3	5.5	59	1	0	1	0	1	3	9.32203	4.8	5	100	0.773	2
388	1	68	2019-02-26 13:54:32	2019-03-07 13:42:16	8.99148	30	1	0	0	1	0	0	0	154	83	5.71	3.19	1.82	4.94	155	184	13.2	1.03	2.55		17.2	1.1	14	4	10	38.2	21	19	6.1	5.5	71	1	0	1	0	0	3	7.74648	5.5	5	80	0.588	3
391	1	67	2018-08-08 14:51:29	2018-08-17 10:52:29	8.83403	1	1	0	1	1	1	0	2	158	69	7.07	4.52	1.89	4.29	136	223	13.1	1.02	4.78	33.4	15.8	0.41	9	5	4	36.7	67	39	6.2	5.5	53	1	0	1	0	0	3	10.3774	5.5	5	90	0.64	3
393	1	25	2017-11-09 05:30:59	2017-11-10 20:18:14		300	1	0	0	0	0	0	1	142	91	5.53	2.78	1.89	5.14	134	321	14.8	1.16	2.28	38.8	18.9		8	4	4	43.8	133	78	4.7	5.5	65	0	1	1	0	0	3	8.46154	5.5	5	100	0.502	3
394	0	83	2017-10-21 14:45:53	2017-10-28 13:50:12	6.96133	3	0	0	0	1	0	1	0	152	74	6.87	4.38	1.86	3.74	118	199	14.3	1.11	4.39	36	54.4	0.75	11	5	6	36.7	21	30	5.7	5.5	69	1	0	1	0	0	3	7.97101	5.5	5	100	0.637	3
395	1	76	2017-03-29 15:56:14	2017-04-05 09:53:08	6.74785	18	1	0	0	0	0	0	1	116	62	3.93	1.86	1.35	3.45	114	129	12.9	0.97	3.14	32.7	16.3		6	2	4	33.8	18	16	4.6	5.5	71	1	0	1	0	0	3	7.74648	5.5	5	80	0.473	3
397	1	60	2015-04-03 13:00:18	2015-04-13 10:30:36	9.89604	4	1	1	1	0	0	0	0	134	91	8.81	6.6	1.4	4.74	148	181	13.9	1.05	3.57		15.3		6	9	9	33.6	9	15	5.2	5.5	95	0	0	1	0	0	3	5.78947	5.5	5	80	0.749	3
396	1	73	2015-10-19 20:11:24	2015-11-06 10:53:01	17.6122	50	1	0	0	0	0	0	1	126	74	8.47	3.2	4.7	3.5	121	112	14.6	1.13	2.16		16.4		13	5	8	33.8	8	17	5.6	5.5	76	1	1	1	0	1	3	7.23684	6.3	5	140	0.377	3
389	1	68	2018-12-24 15:21:42	2019-01-04 09:58:55	10.7758	10	1	1	0	0	0	0	0	131	79	9.43	6.15	2.33	4.19	134	251	12.6	0.94	3.27	32.4	16.1	0.26	12	5	7	36.4	14	15	4.8	5.5	54	1	0	1	0	0	3	10.1852	7.4	5	100	0.652	4
398	1	86	2018-06-13 14:04:18	2018-06-22 14:29:47	9.0177	4	1	0	1	0	0	1	0	152	81	5.93	4.5	0.96	4.08	123	131	13.8	1.09	2.5	31.5	16.5	3.91	18	7	11	31.1	9	21	4.2	5.5	96	1	0	1	0	0	3	5.72917	7.8	5	100	0.759	4
402	1	62	2017-10-21 15:09:12	2017-10-30 10:51:14	8.82086	5	1	0	0	0	0	0	2	120	72	6.14	4.45	1.15	4.63	141	122	14.3	1.12	4.22	35.3	16	0.8	13	6	7	37.9	25	23	4.8	5.6	63	1	0	1	0	0	3	8.88889	4.5	5	100	0.725	2
407	1	89	2015-06-29 00:54:22	2015-07-07 09:15:26	8.34796	4	0	1	1	0	0	0	0	152	62	5.67	4.1	1	3.8	118	166	13.4	1.01	2.87		15.4		14	5	9	38.4	13	23	4.3	5.6	136	1	1	1	0	1	3	4.11765	5	5	100	0.722	2
408	1	84	2015-05-29 14:59:38	2015-06-10 10:43:29	11.8221	20	0	0	0	1	0	0	0	168	89	9.35	7.9	0.7	3.63	110	286	14.3	1.1	7.58		15.5	0.62	21	7	14	35.4	18	18	5.8	5.6	82	0	0	1	0	0	3	6.82927	5.2	5	120	0.841	2
400	1	71	2018-05-12 14:33:25	2018-05-23 12:04:02	10.8963	10	0	1	0	1	0	1	1	140	76	9.03	6.37	1.5	4.42	138	141	13.8	1.08	3.32	39.7	16.7	0.76	14	6	8	36.6	13	18	3.7	5.6	101	1	1	1	0	0	3	5.54455	5.6	4	90	0.705	3
401	1	89	2018-01-06 13:51:33	2018-01-10 13:55:30	4.00274	10	1	1	0	1	0	0	0	130	68	7.56	4.09	2.52	4.57	117	310	13.9	1.09	6.19	42.4	16.1	0.78	6	3	3	35.6	10	20	7.9	5.6	101	1	1	1	0	0	3	5.54455	5.6	5	100	0.541	3
403	1	69	2017-10-01 09:09:43	2017-10-08 10:31:10	7.05656	30	1	1	0	0	0	0	0	129	72	5.4	3.6	1.54	4.53	144	272	13	0.99	4.16	38.6	15.3	0.47	6	3	3	35.9	12	21	5.4	5.6	63	0	1	1	0	0	3	8.88889	5.6	5	150	0.667	3
404	1	77	2017-09-06 14:03:11	2017-09-18 10:15:20	11.8418	2	1	1	1	0	0	0	2	152	89	8.33	5.54	1.66	4.22	144	222	13.6	1.05	4.96	31.1	15.2	1.16	24	9	15	35.1	7	16	4.7	5.6	99	1	0	1	0	0	3	5.65657	5.6	4	140	0.665	3
409	1	63	2015-02-15 10:01:24	2015-02-22 15:31:45	7.22941	30	0	0	0	0	0	0	0	112	77	5.74	3.54	1.84	4.38	144	173	13.3	1.01	2.1		17.3		15	5	10	43.9	20	27	6.6	5.6	69	0	0	1	1	1	3	8.11594	5.6	5	60	0.616	3
399	1	73	2018-12-15 17:05:37	2018-12-21 10:54:28	5.74226	3	0	1	0	0	0	0	1	137	88	6.61	3.65	2.29	3.66	122	203	12.8	0.99	3.65	33.1	15.7	1.37					25		7	5.6	74	1	1	1	0	0	3	7.56757	6.8	5	80	0.552	4
405	0	81	2016-11-19 13:15:01	2016-11-30 10:36:54	10.8902	15	1	0	0	0	0	0	1	150	64	5.28	3.81	1.13	4.08	121	231	13	0.98	3.4	30.7	18.2		10	4	6	37.5	16	27	6.7	5.6	48	1	0	1	0	0	3	11.6667	6.9	5	60	0.722	4
406	0	82	2015-10-03 16:45:17	2015-10-15 09:38:41	11.7038	60	1	0	0	0	0	0	0	159	70	9.36	7.97	0.68	3.69	108	162	13.6	1.03	2.63		15.9		13	5	8	33.1	10	14	5.5	5.6	61	1	0	1	0	0	3	9.18033		4	100	0.852
416	1	94	2015-04-23 14:03:09	2015-05-17 09:36:50	23.8151	7	0	0	1	0	0	0	1	120	71	8.61	5.98	1.62	3.99	132	183	14.9	1.14	4.11		14.6	5.64	15	6	9	33.8	36	37	4.9	5.7	72	0	0	1	0	0	3	7.91667	3.7	5	80	0.695	1
415	1	70	2017-02-09 08:15:07	2017-02-18 10:56:00	9.11172	2	0	0	0	1	0	0	0	118	86	8.83	7.51	1.01	4.75	148	177	11.8	0.87	3.71	31.2	16.1		9	3	6	43	17	26	6.2	5.7	58	0	0	1	0	0	3	9.82759	5.1	5	70	0.851	2
417	1	66	2017-09-02 15:37:31	2017-09-11 09:53:19	8.76097	20	0	1	1	1	1	0	1	133	72	5.53	2.71	2.1	4.06	128	164	13.9	1.08	4.32	34.1	16	0.6	6	3	3	33.9	16	16	5.4	5.7	64	1	0	1	1	0	3	8.90625	5.4	5	100	0.49	3
418	1	76	2017-07-28 17:37:28	2017-08-14 10:59:12	16.7234	10	1	0	1	0	0	0	1	129	85	7.24	4.26	1.5	4.45	139	167	14.3	1.12	3.19	30.3	16.9	0.5	8	4	4	33.9	14	20	5.1	5.7	88	1	0	1	1	0	3	6.47727	5.5	5	100	0.589	3
411	1	81	2018-06-21 16:25:54	2018-07-03 10:28:55	11.7521	2	1	1	1	0	0	0	1	108	72	5.82	3.8	1.32	4.28	119	193	13.6	1.07	4.75	41.4	17.9	1.49	10	5	5	36.7	26	28	4.6	5.7	62	1	0	1	0	0	3	9.19355	5.7	5	80	0.653	3
412	1	88	2017-07-20 18:45:59	2017-07-28 13:53:23	7.79681	30	1	1	0	1	0	0	0	138	71	8.06	5.23	1.83	4.02	122	270	13	0.98	4.45	34	17	0.73	5	2	3	31.7	11	21	4.2	5.7	76	1	0	1	0	1	3	7.5	5.7	5	100	0.649	3
419	1	71	2016-07-28 16:14:04	2016-08-06 10:24:06	8.75697	60	1	0	0	1	0	0	0	142	75	7.26	4.73	1.73	4.71	147	265	13.7	1.05	3.25		17.9		12	5	7	38.9	9	21	4.4	5.7	69	1	1	1	1	1	3	8.26087	5.7	5	90	0.652	3
420	1	69	2015-05-22 18:41:58	2015-06-18 09:58:50	26.6367	15	0	1	1	0	0	0	1	118	59	7.74	5.4	1.6	4.22	133	192	13.2	0.99	3.63	34	14.6		17	7	7	36.2	9	21	5.9	5.7	60	1	0	1	1	0	3	9.5	6.1	5	80	0.697	3
413	1	83	2017-07-07 00:49:27	2017-07-25 10:29:36	18.4029	30	0	0	0	0	0	1	0	122	99	4.87	2.78	1.55	3.98	123	108	14.1	1.09	2.02	39	17.8	20	8	4	4	33.1	15	21	4.8	5.7	44	1	1	1	0	1	3	12.9545	6.4	5	100	0.571	3
414	1	85	2017-03-11 21:13:11	2017-03-21 10:06:07	9.53676	4	0	0	0	0	0	0	1	155	75	6.61	5.01	1.07	3.33	100	222	13.3	1.01	3.81	35.6	15.3	2.03	7	2	5	31.6	8	17	4.7	5.7	93	1	0	1	0	0	3	6.12903	6.7	5	80	0.757	4
410	0	66	2019-01-04 19:01:04	2019-01-14 11:25:26	9.68359	10	1	0	0	0	0	0	0	105	95	4.28	2.32	1.51	4.25	127	256	13	1.01	4.21	31.5	15.1	0.32	5	2	3	31.3	23	18	6.1	5.7	44	1	1	1	0	0	3	12.9545	6.8	5	80	0.541	4
427	1	77	2016-12-27 11:39:12	2017-01-05 09:25:11	8.90693	14	0	1	0	0	0	0	0	123	88	5.34	3.38	1.59	3.85	122	166	14	1.08	3.33	38.3	17		5	3	2	31.4	11	21	5	5.8	69	1	1	1	0	0	3	8.4058	5.1	3	100	0.633	2
422	1	88	2018-05-31 14:51:56	2018-06-12 10:33:07	11.8203	2	1	1	0	1	0	0	1	148	73	7.03	4.37	1.88	4.54	138	213	13.5	1.06	5.96	44.3	17.2	1.11	7	3	4	33.9	14	24	4.5	5.8	74	1	0	1	0	0	3	7.83784	5.8	5	90	0.622	3
423	1	64	2018-01-18 15:22:57	2018-01-30 11:28:20	11.8371	30	1	1	0	0	0	0	1	141	76	8.02	6.85	0.71	4.75	148	285	13.6	1.06	4.04	42.5	14.9	0.34	14	6	8	42.5	10	18	4.6	5.8	44	1	0	1	0	0	3	13.1818	5.8	5	40	0.854	3
424	1	71	2017-09-16 15:28:29	2017-09-23 13:01:26	6.89788	20	0	1	1	0	0	0	0	143	82	4.19	2.35	1.46	4.25	126	78	12.9	0.98	4.26	28.5	16.8	0.4					19		4.9	5.8	110	0	1	1	0	0	3	5.27273	5.8	5	80	0.561	3
425	0	91	2017-06-07 17:13:47	2017-06-19 10:00:10	11.6989	4	1	0	1	0	0	0	0	121	83	5.97	3.07	2.34	3.78	125	204	12.3	0.92	3.79	35.7	16.9	1.34	10	4	6	32	11	20	3.9	5.8	60	1	0	1	0	0	3	9.66667	5.8	5	100	0.514	3
426	0	85	2017-03-21 10:42:56	2017-04-05 10:20:21	14.9843	3	1	0	0	1	0	0	0	115	74	14.02	11.72	1.51	4.31	129	257	11.7	0.86	4.11	26.2	15.4		13	4	9	34.9	20	42	8.7	5.8	47	0	1	1	0	0	3	12.3404	5.8	3	100	0.835	3
429	1	68	2015-12-28 13:32:54	2016-01-07 10:07:44	9.85752	10	0	0	0	1	1	0	1	120	83	6.1	3.37	1.77	4.9	152	196	13.6	1.03	3.36	39	15.7	1.42	13	4	9	37.4	14	38	7.6	5.8	76	0	0	1	0	0	3	7.63158	5.8	5	70	0.552	3
430	1	68	2015-03-06 15:16:29	2015-03-17 13:46:22	10.9374	3	1	0	1	0	0	0	1	144	77	7.89	6.22	0.9	4.77	139	198	12.6	0.92	4.46		16.1		26	8	18	34.8	28	40	6.7	5.8	84	0	0	1	0	0	3	6.90476	5.8	5	100	0.788	3
428	1	75	2016-01-11 15:27:16	2016-01-21 11:58:49	9.85524	20	1	0	0	1	0	0	1	162	76	8.65	7	0.9	4.53	140	185	12.4	0.91	3.41	44.1	15.8		10	4	6	38	8	20	4.7	5.8	66	1	0	1	0	0	3	8.78788	6.3	5	50	0.807	3
432	1	80	2017-03-09 16:31:41	2017-03-20 09:36:47	10.7119	3	1	0	0	0	0	0	2	130	80	4.75	3.63	0.5	3.52	113	233	15.2	1.19	4.48	36.5	16.5	1.03	10	3	7	28.3	13	19	6	5.8	78	1	0	1	1	0	3	7.4359	6.5	5	180	0.765	3
421	1	61	2018-10-25 14:51:07	2018-10-31 10:26:37	5.81632	5	0	1	1	0	1	0	1	158	89	6.14	4.31	1.33	4.57	148	220	12.4	0.92	4.17	31.1	14.4	0.26	14	6	8	38.3	12	18	7.7	5.8	59	1	0	1	0	0	3	9.83051	6.8	5	100	0.701	4
433	1	78	2015-06-23 18:08:37	2015-06-28 10:43:12	4.69068	10	0	1	1	0	0	0	1	154	84	8	6.71	0.8	4.57	137	146	13.7	1.04	3.71		15.1		12	4	8	36.3	12	18	3.5	5.8	91	0	0	1	1	1	3	6.37363	7.6	5	80	0.838	4
431	1	70	2014-11-14 10:19:27	2014-11-27 10:32:28	13.009	4	1	1	1	1	0	0	0	180	95	15.59	14.3	0.9	4.66	149	451	15.7	1.22	2.24		16.1		12	4	8	37.1	8	13	9.3	5.8	74	0	0	1	0	0	3	7.83784	7.9	5	100	0.914	4
448	0	74	2017-05-23 13:42:46	2017-06-04 09:26:08	11.8218	5	0	0	0	1	0	0	2	121	74	5.47	3.59	1.12	4.22	121	241	12.2	0.91	3.5	36.9	16.6	1.07	6	3	3	40	14	17	6	5.9	58	1	0	1	1	0	3	10.1724	3.9	5	100	0.656	1
441	1	53	2017-08-26 14:06:14	2017-09-04 10:25:19	8.84659	2	1	1	1	0	0	0	2	127	83	5.92	3.54	1.77	4.49	141	249	12.7	0.96	3.37	41.3	16.3	0.8	7	4	3	32.8	15	19	5.9	5.9	77	1	0	1	0	0	3	7.66234	4.3	5	80	0.598	1
444	1	70	2016-06-25 08:32:40	2016-07-05 10:27:44	10.0799	20	1	0	0	1	0	1	2	165	88	7.38	5.9	1.1	4.91	146	201	13.2	1.01	2.62		18.7	1.45	19	6	13	37	15	18	11.4	5.9	65	0	0	1	0	0	3	9.07692	4.3	5	160	0.793	1
449	0	78	2015-07-20 08:56:12	2015-07-30 09:36:27	10.028	7	1	0	0	0	0	0	1	144	69	7.89	5.3	2	3.53	97	301	12.7	0.94	2.61		17.1		6	2	4	32	50	54	5.4	5.9	67	0	1	1	1	0	3	8.80597	4.4	5	150	0.677	1
437	1	62	2018-01-28 13:35:47	2018-02-02 12:29:41	4.9541	4	0	1	0	0	0	0	0	146	86	7.87	5.63	1.53	4.59	147	261	12.1	0.91	3.62	40.5	16	0.53	12	8	4	41.8	31	31	6.5	5.9	43	1	1	1	0	0	3	13.7209	5.6	5	100	0.716	3
434	1	55	2019-03-18 13:44:55	2019-04-04 10:12:03	16.8522	7	1	1	0	0	0	0	2	116	87	7.24	4.38	2.16	5.2	156	225	13.6	1.07	3.97		15.5	0.15	8	3	5	41.2	18	20	6.6	5.9	75	1	1	1	0	0	3	7.86667	5.9	5	140	0.605	3
436	1	79	2018-05-25 15:12:24	2018-06-19 09:56:40	24.7807	120	0	0	0	0	0	0	0	156	86	11.67	5.05	5.23	5.02	160	189	13.6	1.07	4.39	38.2	15		8	4	4	38.1	42	30	4	5.9	96	1	0	1	0	0	3	6.14583	5.9	5	100	0.433	3
438	1	76	2018-01-25 13:50:09	2018-01-29 13:41:54	3.99427	30	1	1	1	0	0	0	1	128	74	7.76	4.62	2.47	4.21	131	249	12.9	0.99	4.22	41.6	17.2		7	4	3	41.1	22	19	9	5.9	91	0	1	1	0	0	3	6.48352	5.9	5	110	0.596	3
439	1	73	2017-11-17 18:00:14	2017-11-25 13:40:35	7.81969	100	1	0	0	1	0	0	0	160	81	5.79	3.65	1.49	4.24	134	146	12	0.89	3.48	36.5	15.7		13	4	9	43.8	70	42	5.4	5.9	88	0	1	1	0	1	3	6.70455	5.9	5	100	0.631	3
440	0	82	2017-11-07 20:00:41	2017-11-15 10:47:25	7.61579	1	1	0	0	0	0	0	0	135	76	6.94	4.04	2.37	3.5	106	227	13.7	1.05	3.66	35.3	15.1	2.46	10	6	4	38	7	22	5.2	5.9	56	1	0	1	0	0	3	10.5357	5.9	5	120	0.583	3
442	1	87	2017-06-08 13:57:46	2017-06-19 12:33:49	10.9417	2	0	0	0	0	0	0	0	131	68	7.01	5.24	1.28	3.88	120	232	13.8	1.06	4.63	34.2	15.6						29	24	5.5	5.9	64	1	0	1	0	0	3	9.21875	5.9	5	80	0.747	3
443	1	75	2016-07-02 13:19:07	2016-07-04 10:21:27	1.87662	30	1	1	0	1	0	0	0	179	100	5.21	3.2	1.4	4.63	131	136	13.2	1.01	4.93		16.1		5	3	2	39.1	22	26	5.9	5.9	58	1	1	1	0	0	3	10.1724	5.9	5	100	0.622	3
445	1	71	2016-04-19 15:04:59	2016-05-03 10:06:49	13.7929	30	1	0	0	0	0	0	0	156	97	5.66	3.85	1.21	4.28	137	244	12.6	0.95	3.95	33.4	15.1	1.38	15	6	9	33.5	11	13	6.8	5.9	81	1	1	1	0	0	3	7.28395	6.2	5	80	0.68	3
435	1	68	2019-01-05 19:21:28	2019-01-28 10:03:46	22.6127	11	1	0	0	1	0	0	0	143	74	6.6	5.79	0.58	4.6	145	227	12.6	0.97	5.22	35.3	14.8	0.29	9	4	5	30.8	25	20	5.4	5.9	59	0	0	1	0	0	3	10	7	5	60	0.877	4
446	1	81	2016-01-25 14:19:36	2016-02-04 10:47:19	9.85258	10	0	0	0	0	0	0	0	137	75	8.2	5.51	1.83	3.56	112	177	13.9	1.06	2.54	34.1	17		14	5	9	33.7	9	11	5.5	5.9	71	1	0	1	0	0	3	8.30986	8.9	5	80	0.669	4
447	1	89	2015-04-06 09:19:08	2015-04-15 10:40:46	9.05669	14	1	0	0	0	0	0	1	165	90	6.53	5.3	1	3.76	120	106	13.9	1.08	4.52	31.7	15.6	3.75	27	9	18	33.2	8	19	4	5.9	64	0	0	1	0	1	3	9.21875		5	100	0.81
450	1	56	2019-03-18 14:34:31	2019-03-25 13:40:17	6.96234	2	1	1	1	0	0	0	1	132	72	6.35	4.93	0.83	3.75	117	251	13.8	1.09	4.49		15.1	0.27					22		8.7	6	62	1	1	1	0	0	3	9.67742	3	5	100	0.776	1
451	1	63	2018-04-09 15:59:59	2018-04-14 10:46:00	4.78196	10	1	1	1	0	0	0	1	128	74	8.82	6.25	1.76	4.72	151	336	13	1	3.67	37.4	17.4	0.34	17	4	13	43.6	7	13	4.3	6	87	1	1	1	0	0	3	6.89655	5.1	5	80	0.708	2
452	1	62	2017-09-22 22:02:43	2017-10-02 14:23:29	9.68109	4	0	1	0	0	0	0	0	115	70	8.62	5.97	1.87	5.01	157	260	12.8	0.97	3.98	30.1	15.9	0.22					27		5.4	6	67	1	0	1	0	0	3	8.95522	6	5	100	0.693	3
454	1	65	2015-06-02 16:25:05	2015-06-15 09:59:16	12.7321	7	1	0	0	0	0	0	1	111	60	4.24	3	0.8	3.13	105	182	14.9	1.16	2.53		16.8								5.9	6	64	0	0	1	0	0	3	9.375	6	5	50	0.698	3
455	1	61	2015-02-11 14:24:01	2015-02-17 10:05:24	5.82041	14	0	1	0	0	0	1	1	151	93	9.6	7.5	1.3	3.68	121	162	13.5	1.03	3.26		15.1								7	6	75	1	0	1	0	0	3	8	6	5	100	0.779	3
456	1	69	2016-02-11 10:01:11	2016-02-18 09:59:05	6.99854	11	1	0	1	1	1	0	1	159	80	7.16	4.4	2.1	4.46	144	184	13.1	1.03	3.61	33.1	16.1		14	5	9	35.7	21	18	5.7	6	80	1	1	1	1	0	3	7.5	6	5	100	0.609	3
453	1	87	2015-10-20 05:13:07	2015-10-28 10:15:09	8.20975	1	1	1	0	0	0	0	1	146	80	8.81	6.7	0.9	4.15	132	231	15.1	1.18	4.13	40.7	20.3	2.1	6	3	3	35.6	13	19	4.6	6	71	1	0	1	0	0	3	8.4507	7.7	5	100	0.758	4
457	1	68	2016-01-19 13:38:09	2016-01-27 11:21:49	7.90532	5	1	0	0	0	0	0	2	90	43	4.13	2.6	1.2	3.79	109	261	13.3	1	4.93	39.9	17.1		8	4	4	27	11	29	3.9	6	121	0	0	1	1	0	3	4.95868	9	5	85	0.622	4
462	1	79	2017-01-08 15:22:21	2017-01-17 09:29:33	8.755	3	0	0	1	0	0	0	1	149	76	3.79	1.36	1.91	3.82	119	170	14.6	1.14	3.59	38.7	13.6		6	3	3	31.9	10	20	5.8	6.1	64	1	1	1	0	0	3	9.53125	5	5	100	0.358	2
458	0	93	2019-01-07 11:37:21	2019-01-16 10:51:40	8.96828	4	1	0	0	1	0	0	0	177	73	4.05	2.76	0.83	3.96	122	196	12.9	1	3.36	37.7	16.9	1.9	7	3	4	33	11	22	8.8	6.1	71	1	1	1	0	1	3	8.59155	6.1	4	80	0.682	3
459	1	68	2018-09-12 14:23:34	2018-09-25 13:35:45	12.9668	3	1	1	1	0	1	0	2	118	68	8.16	6.04	1.51	4.77	150	218	13.1	0.99	3.26	32.5	16.8	0.39	16	5	11	37.2	26	21	8.9	6.1	63	1	0	1	0	0	3	9.68254	6.1	5	180	0.741	3
460	1	55	2017-10-28 10:21:56	2017-11-05 10:08:51	7.99091	2	1	1	1	1	0	0	0	141	88	11.32	8.48	2.18	5.43	162	220	13.6	1.04	4.11	40.5	18.1	0.29	25	11	14	40.8	30	22	5.4	6.1	73	1	0	1	0	0	3	8.35616	6.1	5	100	0.749	3
463	1	69	2016-03-19 15:05:37	2016-03-26 14:52:37	6.99097	2	1	1	0	1	0	0	0	163	90	6.68	5.1	0.8	4.71	146	117	13.9	1.11	3.13		18.1	0.91					41	31	11.3	6.1	67	0	1	1	0	0	3	9.10448	6.1	5	50	0.768	3
464	1	92	2015-02-04 14:30:30	2015-02-12 10:25:50	7.83009	60	1	0	0	0	0	0	2	150	69	6.02	3.94	1.5	3.82	115	175	12.9	0.97	3.57		15.4		8	3	5	34.8	9	21	4.2	6.1	84	0	0	1	0	0	3	7.2619	6.1	5	130	0.654	3
465	1	100	2014-12-14 15:18:00	2014-12-30 10:25:24	15.7968	30	1	0	0	1	1	0	1	150	112	6.31	3.5	2	3.67	123	189	13.7	1.05	3.24		15.5		10	4	6	34.3	16	25	4.5	6.1	90	0	0	1	0	0	3	6.77778	6.1	5	70	0.562	3
461	1	80	2017-07-20 20:08:20	2017-07-28 10:52:49	7.61422	5	0	0	1	1	0	0	0	145	88	4.99	3.52	0.99	4.21	124	247	14.8	1.15	5.04	46.8	15.3	20	5	2	3	34.2	9	18	4.2	6.1	82	1	0	1	0	1	3	7.43902		4	80	0.706
472	1	77	2015-10-10 09:45:21	2015-11-02 11:22:16	23.0673	1	1	0	0	0	0	0	0	133	72	7.12	5.5	1.2	4.35	132	178	14.8	1.15	2.63		16.2		8	4	4	30.5	9	19	5	6.2	61	1	1	1	1	0	3	10.1639	4.6	5	80	0.768	2
468	0	83	2017-08-19 20:28:52	2017-08-30 10:12:02	10.5716	10	0	0	0	1	0	0	0	179	73	5.24	3.21	1.57	3.8	112	203	13.7	1.06	4.29	33	15.8	0.65	10	4	6	33.4	19	20	8.2	6.2	52	1	0	1	0	0	3	11.9231	5	5	100	0.613	2
467	0	76	2018-10-28 09:50:15	2018-11-12 11:31:08	15.0701	3	1	0	0	1	1	0	0	165	85	6.91	3.62	2.66	3.67	114	183	13.4	1.02	4.01	40.2	15.9	0.54	23	8	15	31.4	13	21	6.2	6.2	48	1	0	1	0	0	3	12.9167	5.7	5	40	0.525	3
470	1	81	2015-03-21 13:11:01	2015-03-26 10:58:00	4.90763	10	1	0	1	0	0	0	0	136	62	4.98	2.8	1.5	4.25	133	202	13.7	1.03	3.54		15.1		10	4	6	33.4	14	17	6.3	6.2	84	0	0	1	0	0	3	7.38095	6.2	5	100	0.561	3
469	1	52	2015-09-03 18:00:12	2015-09-09 12:58:59	5.79082	1	1	1	0	0	0	0	2	107	71	9.1	6.82	1.45	4.64	135	151	12.4	0.91	2.18		16.3		11	4	7	37.8	52	31	4.2	6.2	57	0	0	1	0	0	3	10.8772	6.5	5	110	0.75	3
471	1	81	2017-01-20 09:18:03	2017-01-25 11:45:02	5.10207	7	0	1	1	1	0	0	0	170	76	6.36	4.52	1.09	4.43	137	245	12.3	0.91	4.42	35	15.9	0.69	10	4	6	32.1	8	21	3.6	6.2	83	1	0	1	1	1	3	7.46988	7.1	5	100	0.711	4
473	1	78	2015-07-20 12:52:32	2015-08-04 09:48:04	14.8719	7	1	1	1	0	0	0	1	142	73	6.41	5.1	0.9	4.47	132	158	13.1	0.98	3.61	34.3	16.5		6	3	3	39.3	11	18	7.4	6.2	88	1	0	1	1	1	3	7.04545	7.5	5	100	0.792	4
466	1	79	2018-12-11 13:26:12	2018-12-17 12:25:05	5.95756	8	1	1	0	1	0	1	0	140	65	3.57	2.23	0.81	3.46	110	186	13.9	1.1	2.7	35	15.4	0.7	7	3	4	37.6	41	43	4.6	6.2	57	1	0	1	0	1	3	10.8772	10.6	5	100	0.624	4
484	1	85	2018-05-14 19:09:51	2018-05-30 10:27:52	15.6375	4	1	1	0	1	0	0	1	173	87	5.4	2.83	1.79	3.24	106	122	13.8	1.08	4.57	38.9	15.8	0.88	12	6	6	29.2	14	33	6.3	6.3	62	1	1	1	1	0	3	10.1613	4.9	5	70	0.524	2
485	1	88	2015-12-31 17:24:52	2016-01-25 10:48:17	24.7246	3	1	0	0	0	0	0	0	198	90	6.57	5	1.1	4.4	141	220	13.1	0.98	2.84	34.5	16		27	11	16	37	9	16	3.8	6.3	64	1	0	1	1	1	3	9.84375	5.3	5	100	0.756	2
480	1	79	2015-10-30 11:16:06	2015-12-13 10:37:55	43.9735	60	1	0	0	0	0	0	1	150	76	9.66	6.8	2	4.27	123	194	12.5	0.92	3.79	32.9	15.2		10	4	6	42.6	11	21	7.6	6.3	76	1	1	1	0	0	3	8.28947	5.8	5	100	0.709	3
477	1	53	2017-07-06 15:03:48	2017-07-17 10:12:42	10.7978	48	1	1	0	0	0	0	0	151	98	8.31	5.42	2.11	5.09	152	127	13.1	0.99	2.88	31.9	17.3		11	5	6	44.6	37	33	5.8	6.3	81	1	0	1	0	0	3	7.77778	6.1	5	100	0.652	3
474	1	67	2019-04-11 08:39:52	2019-04-24 09:47:00	13.0466	2	1	0	0	0	1	0	1	174	90	7.3	5.62	1.27	4.65	138	257	13	1.01	3.33		16.7	0.26	13	5	8	32.9	11	10	12.8	6.3	75	1	0	1	0	0	3	8.4	6.3	5	100	0.77	3
476	0	76	2018-05-16 12:50:54	2018-05-26 14:07:11	10.053	90	1	0	0	0	0	0	1	126	65	6.1	3.39	1.78	3.91	125	175	12.5	0.95	3.39	36	17.1	1.16	12	6	6	34.8	156	147	4.7	6.3	72	1	1	1	0	1	3	8.75	6.3	5	100	0.556	3
478	1	82	2016-10-18 19:59:29	2016-10-27 09:44:33	8.57296	20	0	1	0	0	0	0	0	131	55	6.24	4.51	1.11	4.03	130	188	12.9	0.97	2.56	32.8	17.5						23	24	5.9	6.3	66	1	0	1	0	0	3	9.54545	6.3	5	100	0.723	3
479	1	70	2016-03-31 11:10:26	2016-04-05 10:03:32	4.95354	7	1	1	1	1	0	0	0	120	70	3.9	2.2	1.2	3.82	126	265	12.5	0.97	2.74		16.7		6	2	4	38	30	26	9.1	6.3	69	0	1	1	0	0	3	9.13043	6.3	5	100	0.568	3
483	1	71	2018-05-22 18:13:00	2018-05-28 11:13:14	5.7085	60	1	0	1	0	0	0	0	142	82	6.99	4.28	1.76	4.32	135	245	13.4	1.04	2.87	32.2	16.8	0.32	10	3	7	43.2	21	24	6.6	6.3	62	1	0	1	1	0	3	10.1613	6.3	5	60	0.612	3
482	1	49	2015-03-31 13:27:17	2015-04-10 12:38:59	9.96646	7	1	0	0	0	0	0	0	115	67	8.02	5.4	2	4.72	145	241	13.2	0.98	4.05		16		7	3	4	40.9	20	17	10.9	6.3	80	0	0	1	0	0	3	7.875	6.5	5	100	0.673	3
475	1	80	2018-09-03 17:43:08	2018-09-10 14:29:28	6.86551	30	0	0	1	0	0	0	2	122	72	3.04	1.96	0.74	3.27	107	112	14.1	1.09	2.36	35.2	16.3	0.79					22		6.3	6.3	78	0	0	1	0	0	3	8.07692	8	5	140	0.645	4
481	1	64	2015-10-08 17:15:37	2015-10-14 09:55:41	5.69449	14	1	0	0	0	0	0	1	180	100	4.95	3.6	0.8	4.45	140	167	13.4	1.01	2.68		16.7		10	4	6	37.5	12	17	3.9	6.3	45	0	0	1	0	0	3	14	9.1	5	80	0.735	4
493	1	93	2015-07-28 17:23:07	2015-08-18 09:06:09	20.6549	30	1	1	0	1	0	0	2	132	75	7.12	4.32	1.91	3.94	132	198	13.9	1.06	4.74		15.4		20	7	13	31	13	18	4.7	6.4	45	1	0	1	0	1	3	14.2222	3.5	3	90	0.608	1
486	1	72	2019-03-29 14:06:04	2019-04-08 13:52:15	9.99041	60	1	0	0	1	0	0	1	118	81	5.73	2.95	2.17	4.79	143	219	13.2	1.03	2.82		16.1	0.59	14	5	9	35，1	45	110	4.9	6.4	51	0	1	1	0	1	3	12.549	4.2	5	120	0.515	1
488	1	59	2017-09-06 15:17:39	2017-09-14 10:43:40	7.80973	8	1	0	1	0	0	0	2	150	89	6.45	3.96	1.77	4.83	148	274	12.6	0.95	4.5	35.3	14.8	0.48	16	6	10	44.9	18	20	4.6	6.4	65	1	0	1	0	0	3	9.84615	4.5	5	90	0.614	2
494	1	94	2015-07-01 16:23:32	2015-07-13 09:43:06	11.7219	1	1	1	1	1	0	0	2	142	60	9.21	5.02	1.99	3.82	102	207	14.7	1.14	4.06		16.8		14	6	8	31.9	11	19	5.1	6.4	72	1	0	1	0	0	3	8.88889	5.3	5	160	0.545	2
490	1	67	2015-08-28 12:58:26	2015-09-09 09:56:20	11.8735	2	1	0	0	0	0	0	0	138	81	6.8	4.9	1.3	4.18	123	221	15.2	1.19	2.65		15.6		13	5	8	35	11	18	8.7	6.4	59	0	0	1	0	0	3	10.8475	6.2	4	80	0.721	3
487	0	83	2017-10-11 14:12:20	2017-10-27 11:52:34	15.9029	30	0	0	0	1	0	0	1	127	79	6.44	3.95	1.45	4.01	124	215	14	1.09	3.69	32.7	15.6	0.37	9	4	5	38.6	23	24	10	6.4	68	1	0	1	0	0	3	9.41176	6.4	5	70	0.614	3
489	1	63	2016-11-08 12:56:50	2016-11-19 13:03:52	11.0049	8	0	1	1	0	0	0	0	153	83	6.11	3.71	1.69	4.36	138	148	13.3	1.01	3.7	32.7	17.2		16	5	11	38.9	34	33	7.1	6.4	69	1	0	1	0	0	3	9.27536	6.4	5	100	0.606	3
491	0	83	2015-08-20 12:45:42	2015-08-29 13:32:24	9.03243	20	0	0	0	0	0	0	0	150	73	6.11	4.5	1	2.89	86	247	14.9	1.16	5.18		15.2		7	3	4	28	8	18	6.6	6.4	48	0	1	1	0	0	3	13.3333	6.4	5	100	0.733	3
492	1	83	2015-08-19 11:40:26	2015-08-29 09:32:58	9.91148	20	0	1	0	1	0	0	2	173	76	5.47	3.9	0.9	3.82	116	200	14	1.07	4.57		15.2		5	2	3	34.3	4	17	4.2	6.4	55	0	0	1	0	0	3	11.6364	6.4	5	130	0.72	3
495	1	78	2016-01-16 16:49:14	2016-01-25 11:21:22	8.77231	3	0	1	0	0	0	0	2	116	52	14.27	11	2.1	4.96	146	336	13.5	1.02	3.41	35.5	22		8	3	5	36.3	20	17	6.4	6.4	62	1	0	1	1	0	3	10.3226	6.4	5	160	0.769	3
496	1	84	2015-03-21 12:51:39	2015-03-31 09:55:54	9.87795	30	0	0	0	0	0	0	1	158	72	4.21	2.4	1.1	3.45	108	183	15.2	1.17	1.68		15.9						24		7.1	6.4	102	0	0	1	1	1	3	6.27451	6.4	5	100	0.571	3
498	1	54	2018-08-15 19:33:56	2018-08-24 10:34:17	8.62524	2	1	1	1	1	0	0	0	137	85	5.89	3.18	2.12	4.8	152	253	12.4	0.95	3.12	40	15.9	0.36	11	4	7	39.4	17	16	5.7	6.5	68	1	1	1	0	0	4	9.55882	5.5	5	100	0.54	3
503	0	71	2016-12-17 17:07:58	2016-12-30 11:54:44	12.7825	3	1	1	0	0	0	0	0	158	79	8.84	6.4	1.8	3.8	122	358	14.4	1.12	5.15	41.2	15	15.98	5	3	2	28.3	8	15	10.2	6.5	38	1	0	1	0	0	4	17.1053	5.9	4	80	0.718	3
497	1	68	2019-02-18 21:49:00	2019-02-25 10:31:30	6.52951	10	0	1	1	1	0	0	0	141	91	6.76	4.92	1.47	4.91	158	257	12.8	0.99	3.15		16.4	0.52					28		5.2	6.5	67	0	1	1	0	0	4	9.70149	6.5	5	60	0.729	3
499	1	70	2018-04-08 09:11:46	2018-04-21 10:59:39	13.0749	180	1	0	1	0	0	0	1	134	84	5.64	3.71	1.55	4.84	148	185	13.6	1.06	4.14	34.2	15.3	0.52	10	4	6	47.1	43	26	3.8	6.5	63	1	1	1	0	0	4	10.3175	6.5	5	80	0.658	3
501	0	68	2017-05-02 18:58:47	2017-05-11 13:52:34	8.78735	7	1	0	0	0	1	0	0	140	65	6.6	3.95	1.86	4.2	122	243	13.2	1	3.26	36.2	18.2		6	2	4	33.1	10	15	9.2	6.5	64	1	1	1	0	0	4	10.1562	6.5	5	100	0.598	3
502	1	81	2017-02-27 16:26:25	2017-03-13 14:22:06	13.9137	30	0	0	0	0	0	0	0	116	59	8.59	5.08	2.09	4.19	145	271	13.9	1.07	4.04	35.9	15.7		9	4	5	40.4	23	27	4.1	6.5	73	1	0	1	0	0	4	8.90411	6.5	5	70	0.592	3
506	0	52	2015-08-03 10:42:28	2015-08-04 15:57:53	1.21904	30	0	0	0	1	0	0	0	134	74	6.55	3.97	2.08	4.77	145	235	11.8	0.86	3.15		16.4		10	4	6	44.6	52	36	7	6.5	77	1	0	1	0	1	4	8.44156	6.5	5	80	0.605	3
507	1	87	2015-02-27 10:53:04	2015-03-08 13:43:19	9.11823	12	0	0	0	1	1	0	2	170	95	10.23	7.7	1.8	5.12	169	225	13	0.98	5.16		16.1		17	7	10	31.3	23	24	7.7	6.5	87	0	0	1	0	0	4	7.47126	6.5	4	140	0.753	3
508	1	68	2018-03-20 14:13:40	2018-03-27 14:19:03	7.00374	20	1	0	1	0	0	0	1	126	81	5.87	3.8	1.67	4.47	136	279	11.9	0.9	2.72	43.8	16.6		13	6	7	37.1	10	18	4.1	6.5	74	1	1	1	1	0	4	8.78378	6.5	5	80	0.647	3
509	1	74	2016-07-24 09:23:30	2016-07-27 10:53:44	3.06266	45	0	0	0	0	0	0	0	120	70	7.24	5.5	1.1	4.16	121	234	12.6	0.94	3.55		16.2		10	4	6	36	14	18	5.6	6.5	62	0	1	1	1	0	4	10.4839	6.5	5	120	0.764	3
505	1	77	2015-09-06 11:27:25	2015-09-15 10:00:00	8.93929	60	1	0	0	0	0	0	1	128	66	7.16	4.6	1.9	3.65	120	119	13	0.97	3.16		16		16	7	9	36.6	16	20	4.2	6.5	76	1	0	1	0	0	4	8.55263	6.8	5	60	0.64	4
500	1	63	2018-03-15 10:53:00	2018-03-26 11:26:20	11.0231	2	1	1	1	1	0	0	0	118	85	10.7	6.32	3.13	4.95	151	276	11.8	0.89	3.67	32.6	17.1	0.59	10	4	6	38.9	18	15	5.5	6.5	98	1	0	1	0	0	4	6.63265	7.7	5	100	0.591	4
504	0	88	2015-10-07 19:10:29	2015-10-17 12:22:55	9.71697	2	0	0	0	1	0	0	0	166	87	6.77	4.5	1.8	3.92	114	220	12.4	0.91	3.83	39.9	16.5	0.97	7	3	4	32.9	6	13	4.3	6.5	50	1	0	1	0	0	4	13		5	100	0.663
510	1	61	2017-03-15 10:55:09	2017-03-27 09:50:15	11.9549	4	1	1	1	1	0	0	0	133	71	6.21	4.19	1.49	4.31	134	185	13.1	0.99	2.31	34	16.6		10	4	6	36.6	19	15	4.3	6.6	75	0	1	1	1	1	4	8.8	5	5	150	0.674	2
520	1	68	2018-02-15 12:44:47	2018-02-26 10:28:40	10.9055	1	1	1	1	1	0	0	2	147	89	9.07	7.2	1.47	4.36	136	270	11.9	0.9	3.5	29.4	16.5	1.61	14	5	9	32.4	11	20	4.1	6.6	68	1	1	1	1	0	4	9.70588	5.5	5	140	0.794	3
524	0	88	2015-08-25 09:11:31	2015-09-02 10:32:13	8.05604	4	0	0	0	0	0	1	0	122	60	7.87	4.4	2.7	3.9	130	127	14.5	1.12	3.31		16.5		20	10	10	37	10	19	5.9	6.6	66	0	0	1	1	0	4	10	5.8	5	100	0.562	3
511	1	79	2017-10-27 10:09:13	2017-11-01 14:19:42	5.17395	15	1	0	0	1	0	0	0	122	84	5.85	3.25	1.38	4.64	139	194	12	0.89	3.29	35.4	16.8		6	3	3	48.7	24	27	8.7	6.6	76	1	1	1	0	0	4	8.68421	6.6	5	100	0.555	4
512	0	77	2017-09-18 13:43:27	2017-10-01 11:57:17	12.9263	20	1	0	0	1	0	0	1	122	70	6.25	3.83	1.93	4.28	129	201	13.8	1.07	3.37	35.9	16.4	0.77	6	3	3	36.7	9	13	5.9	6.6	52	1	0	1	0	0	4	12.6923	6.6	5	80	0.612	4
517	1	69	2015-05-18 15:33:42	2015-05-27 10:06:38	8.77287	15	1	0	1	1	0	0	0	145	78	4.72	2.95	1.19	4.17	130	186	13.5	1.01	3.01		17.4		6	3	3	39	22	26	3.6	6.6	74	0	1	1	0	1	4	8.91892	6.6	5	100	0.625	4
518	1	85	2015-02-12 11:51:53	2015-03-02 11:36:08	17.9891	30	1	0	0	0	0	0	1	145	100	7.86	6.2	0.6	4.27	139	136	14.4	1.12	3.69		15.1	1.08							5.3	6.6	112	0	0	1	0	0	4	5.89286	6.6	4	100	0.785	4
519	1	76	2018-03-06 20:03:26	2018-03-15 11:24:54	9	10	1	0	0	1	0	0	1	147	87	2.71	1.06	1.23	3.79	123	123	13.2	1.02	2.35	36.1	17	0.91	8	3	5	35.7	13	19	4.3	6.6	121	1	0	1	1	0	4	5.45455	6.6	5	100	0.391	4
521	1	70	2017-09-17 13:41:20	2017-09-29 11:32:27	11.9105	2	1	0	0	0	0	0	2	131	90	6.33	5.22	0.57	3.63	119	204	13.8	1.07	2.31	32.9	17.5	0.95	9	3	6	34.5	9	13	5	6.6	83	1	0	1	1	0	4	7.95181	6.6	5	180	0.824	4
522	1	82	2017-02-20 18:13:06	2017-03-06 10:44:36	13.6885	1	0	0	1	1	0	0	0	163	94	5.06	3.19	1.19	4.46	140	240	13	0.98	3.48	36.1	15.4		20	7	13	40.9	22	27	5.4	6.6	75	1	0	1	1	0	4	8.8	6.6	5	100	0.63	4
523	1	78	2017-02-17 15:58:28	2017-02-27 12:18:11	9.84703	8	1	1	0	0	0	0	0	131	80	5.51	2.7	2.37	3.66	118	185	13.1	0.99	2.77	36.4	15.7	1.07					23	30	4.5	6.6	75	1	0	1	1	1	4	8.8	6.6	5	100	0.489	4
514	1	71	2016-03-02 17:32:10	2016-03-10 11:01:34	7.72875	3	1	0	0	1	1	0	0	139	78	5.33	2.9	2	4.12	129	230	12	0.92	3.15	32.3	16.1		12	4	8	32.4	14	18	6.9	6.6	68	0	0	1	0	0	4	9.70588	7.3	5	80	0.536	4
513	1	65	2016-04-16 19:35:34	2016-04-27 10:50:57	10.6357	7	0	0	0	1	0	0	1	135	91	8	6.5	0.9	4.89	151	127	13.4	1.06	3.21	38.8	15.3		15	5	10	39.9	13	18	4.7	6.6	52	1	0	1	0	0	4	12.6923	7.4	5	100	0.812	4
516	1	86	2015-05-27 11:38:20	2015-06-02 09:42:03	5.91925	10	1	0	0	0	0	0	0	133	82	5.93	4.71	0.7	3.15	105	109	17.6	1.41	2.1		21		18	8	10	34.1	13	28	4.9	6.6	110	1	1	1	0	1	4	6	8.2	5	120	0.794	4
515	1	69	2015-06-23 20:10:57	2015-07-02 11:47:30	8.65038	30	0	0	1	1	0	0	2	184	77	7.15	5	1.5	3.96	126	217	12.9	0.96	3.91	33.1	15.4		16	5	11	35.2	18	20	7.9	6.6	75	1	0	1	0	0	4	8.8		5	100	0.696
527	1	79	2016-07-06 10:22:39	2016-07-26 11:55:53	20.0647	60	1	0	0	0	0	1	1	146	79	7.37	4.52	1.92	4.09	126	204	13.3	1.01	3.17		16.4		8	4	4	39.2	16	21	3.8	6.7	93	1	0	1	0	0	4	7.2043	5.6	5	150	0.613	3
525	1	64	2018-02-01 09:11:20	2018-02-07 13:47:11	6.19156	7	1	1	1	1	0	0	0	177	87	4.65	2.49	1.61	3.75	128	292	13.7	1.07	1.96	35	16.4	2.84	18	8	10	37.3	18	24	7	6.7	87	1	0	1	0	0	4	7.70115	6.7	5	60	0.535	4
526	0	87	2017-02-15 17:10:06	2017-03-05 11:39:05	17.7701	20	1	0	0	1	0	0	2	156	76	5.68	3.18	1.7	4.01	119	249	12.6	0.94	3.48	34.3	16.9		16	5	11	39.6	19	16	4.9	6.7	53	1	0	1	0	0	4	12.6415	6.7	5	160	0.56	4
528	0	35	2018-04-23 19:23:53	2018-05-08 10:18:44	14.6214	7	1	0	1	0	0	0	1	105	66	10.91	6.77	3.42	4.54	130	309	12.6	0.96	3.57	39.5	14.3	0.22	5	2	3	39.1	8	15	6	6.8	53	1	1	1	0	0	4	12.8302	3.6	5	60	0.621	1
531	1	57	2016-07-17 11:19:33	2016-08-02 15:47:44	16.1862	1	0	0	0	0	0	0	1	135	83	15.31	14.1	0.7	3.15	103	357	14.1	1.1	3.31		18		20	11	9	36.5	16	20	5.7	6.8	56	0	0	1	0	1	4	12.1429	5.3	3	120	0.918	2
529	0	87	2018-01-18 22:46:52	2018-02-07 09:58:36	19.4665	7	1	0	0	1	0	1	0	145	82	3.75	1.93	1.28	3.74	116	130	14	1.1	3.78	39.1	15.1	0.6	8	3	5	39	14	32	5.9	6.8	77	1	0	1	0	1	4	8.83117	6.8	4	80	0.515	4
530	0	85	2016-12-21 13:39:14	2017-01-03 10:39:15	12.875	7	0	0	0	0	1	0	2	133	61	5.17	3.08	1.3	3.03	100	280	15.1	1.19	5.1	37.5	15.5		8	3	5	33.2	8	15	11	6.8	66	1	1	1	0	0	4	10.303	6.8	5	150	0.596	4
532	1	79	2015-07-31 16:19:31	2015-08-14 11:03:10	13.7803	90	1	0	0	0	0	0	1	151	66	4.27	2.3	1.29	3.66	112	252	13	0.97	3.03		16.6		12	4	8	38.6	17	21	4.1	6.8	72	1	0	1	0	0	4	9.44444	6.8	5	80	0.538	4
533	1	82	2017-01-11 15:53:20	2017-01-23 10:36:58	11.7803	30	1	0	0	1	0	0	1	158	87	6.33	3.53	1.93	4.32	126	254	13.4	1.02	3.61	38.1	16.6		10	4	6	37.8	28	30	4.3	6.8	56	1	0	1	1	0	4	12.1429	6.8	5	140	0.558	4
534	1	70	2015-05-11 14:54:39	2015-06-01 11:06:25	20.8415	10	1	1	1	1	0	0	0	162	89	4.72	3.04	1.16	4.52	143	174	13.3	0.99	2.3		16.2	12.26	9	4	5	34.2	17	22	4.9	6.8	66	0	1	1	1	1	4	10.303	6.8	5	80	0.644	4
536	1	65	2018-08-10 08:34:55	2018-08-18 11:08:58	8.10698	7	0	0	0	0	1	0	1	164	86	5.32	3.67	1.24	4.19	136	125	14.3	1.14	1.7	29.5	19.3	20	12	5	7	39.8	25	29	12	6.9	56	1	1	1	0	0	4	12.3214	4.7	5	120	0.69	2
535	1	73	2019-01-22 16:37:44	2019-02-03 09:25:28	11.6998	7	0	0	0	1	1	1	1	103	70	11.4	7.03	3.64	4.12	139	217	13.6	1.04	4.3		15.4	0.63	10	4	6	42.9	14	22	7.5	6.9	119	1	0	1	0	0	4	5.79832	6.9	5	80	0.615	4
538	1	85	2016-08-12 10:22:23	2016-08-19 09:44:07	6.97343	60	1	0	0	1	0	0	0	144	87	6.01	4.4	1	4.58	142	160	12.8	0.94	3.8		15.1		12	5	7	42.5	12	17	5.3	6.9	71	1	1	1	0	0	4	9.71831	6.9	5	150	0.728	4
539	1	69	2016-02-20 19:18:48	2016-03-07 10:02:40	15.6138	3	1	1	0	0	0	0	2	114	67	7.25	4.9	1.6	4.18	138	277	12.3	0.95	5.13	35.9	15.1		11	4	7	35.7	17	18	5	6.9	71	1	0	1	0	0	4	9.71831	6.9	5	160	0.682	4
540	1	71	2015-04-29 17:09:54	2015-05-08 10:06:16	8.70581	4	1	0	0	0	0	0	1	188	112	5.35	3.3	1.4	4.32	142	243	12.9	0.95	3.08		16.9		12	4	8	42.2	25	25	4.2	6.9	69	0	0	1	0	0	4	10	6.9	5	60	0.624	4
543	1	69	2016-03-10 09:43:37	2016-03-13 10:11:20	3.01925	5	1	0	1	1	1	0	0	123	67	5.84	3.8	1.4	4.19	131	203	13.9	1.11	3.77	32.8	15.5		10	4	6	42.2	26	21	7.1	6.9	79	0	1	1	1	0	4	8.73418	6.9	5	100	0.647	4
537	1	87	2016-08-18 00:16:19	2016-08-31 10:26:22	13.4236	3	1	1	0	1	0	0	0	157	89	9.17	7	1.3	3.7	113	186	14	1.06	4.26		15.4		6	3	3	31.2	14	28	4.1	6.9	84	1	0	1	0	0	4	8.21429	7.8	5	100	0.768	4
542	1	72	2017-04-28 13:57:09	2017-05-08 10:15:06	9.8458	30	1	1	0	1	1	0	0	130	75	3.77	1.99	1.3	4.96	154	199	13.5	1.03	4.14	31.9	17.1		14	5	9	40.6	21	17	6.9	6.9	85	1	1	1	1	0	4	8.11765	8.3	5	100	0.528	4
541	1	89	2017-08-14 21:30:29	2017-08-29 11:18:42	14.5752	8	0	1	0	1	0	0	2	142	83	5.87	2.79	2.11	4.66	154	164	12.7	0.96	3.78	33.7	15.8	0.55	16	6	10	37.5	16	21	5.5	6.9	61	1	0	1	1	0	4	11.3115	9.1	5	130	0.476	4
544	1	64	2018-07-10 17:24:54	2018-07-18 12:55:21	7.81281	30	0	0	0	0	0	0	0	151	96	7.35	5.19	1.49	4.33	131	218	13.3	1.03	3.45	38	16.5	0.73	12	4	8	33.7	20	22	4	7	60	1	0	1	0	0	4	11.6667	7	5	80	0.706	4
547	1	86	2018-08-15 14:33:36	2018-08-27 10:11:56	11.8183	30	1	1	1	0	0	0	1	143	77	4.39	2.78	1.22	4.34	132	100	14.2	1.13	3.72	42.9	15.3	0.43	17	8	9	43.6	32	28	4.7	7	85	1	0	1	1	0	4	8.23529	7	5	100	0.633	4
545	1	67	2018-01-11 12:03:00	2018-01-22 10:43:05	10.9445	7	1	1	1	0	0	0	1	145	96	8.94	5.88	2.24	4.26	137	315	12.9	0.99	3.1	39.4	14.9	0.24	9	4	5	37.3	19	25	6.3	7	46	1	0	1	0	0	4	15.2174	7.1	5	60	0.658	4
546	1	65	2015-03-22 15:52:34	2015-04-01 10:09:45	9.76193	1	0	0	0	1	0	0	2	120	73	7.52	5.7	1.2	4.15	132	244	14.1	1.07	4.02		16.7								5.1	7	75	0	0	1	0	0	4	9.33333	7.3	5	70	0.755	4
549	1	67	2017-07-17 09:39:52	2017-07-26 10:48:47	9.04786	30	1	1	1	0	0	0	1	118	78	6.12	3.14	2.04	4.28	133	232	13.3	1.01	3.43	35.6	16.1	1.7	7	3	4	30.3	14	13	5.4	7.1	63	1	0	1	0	1	4	11.2698	5.1	5	80	0.513	2
551	1	62	2016-11-08 10:06:17	2016-11-16 10:38:41	8.0225	3	1	0	0	0	0	0	0	112	74	10.6	7.72	1.48	4.03	136	169	15.4	1.2	2.71	32.9	16.6	0.45	44	18	26	34	17	29	4.3	7.1	75	1	0	1	1	0	4	9.46667	5.5	5	100	0.728	3
550	1	86	2016-01-08 17:03:01	2016-01-20 16:28:32	11.9761	8	0	0	0	1	0	0	0	187	78	11.87	8.6	2.1	4.01	120	333	13.9	1.06	2.89	34.9	15.6		8	3	5	33.3	14	22	5.4	7.1	70	1	0	1	0	0	4	10.1429	7	4	100	0.723	4
548	0	72	2017-12-10 10:21:26	2017-12-26 12:33:50	16.0919	13	1	0	0	0	0	0	1	146	91	11.74	8.5	2.48	4.4	133	242	11.8	0.89	4.16	32.4	15.6	0.66	9	3	6	42.1	14	19	7.4	7.1	56	0	1	1	0	0	4	12.6786	7.1	5	160	0.724	4
562	1	79	2016-10-05 09:25:23	2016-10-16 10:14:05	11.0338	4	1	0	1	0	0	0	0	177	73	4.7	4.04	0.46	4.16	130	159	13	0.96	3.36	31.6	16.1		15	5	10	36.7	14	17	4.2	7.2	76	1	0	1	1	0	4	9.47368	5.7	5	150	0.86	3
552	1	84	2019-02-12 19:09:07	2019-02-28 10:51:50	15.6547	1	1	0	0	1	0	0	2	195	75	9.51	7.5	1.65	3.91	87	209	14.8	1.19	2.21		15.3	4.5	13	4	9	35.3	9	17	8.5	7.2	90	0	0	1	0	0	4	8	6.5	4	140	0.789	3
557	1	74	2016-07-12 16:31:07	2016-07-20 09:39:55	7.71444	2	1	0	0	0	0	0	2	148	94	7.77	6.1	1.1	4.48	134	87	14	1.09	2.85		16.7	11.36	13	6	7	32.4	9	14	4.3	7.2	95	1	1	1	0	0	4	7.57895	6.8	5	140	0.789	4
554	1	74	2017-08-30 13:56:15	2017-09-07 14:35:06	8.02698	30	1	0	0	1	1	0	0	166	67	5.3	2.85	2	3.89	116	226	11.6	0.86	4.99	33.7	15.6	0.48	8	4	4	34.8	53	31	5.3	7.2	58	1	0	1	0	0	4	12.4138	7.2	5	80	0.538	4
555	1	54	2017-01-06 14:33:36	2017-01-22 12:22:23	15.9089	10	0	0	0	1	0	0	2	99	62	7.46	4.14	2.71	5.38	152	176	14	1.08	3.46	40.7	16.3		25	8	17	44.3	24	15	8.7	7.2	82	1	1	1	0	1	4	8.78049	7.2	4	120	0.555	4
556	1	61	2016-10-11 09:32:40	2016-10-13 10:10:29	2.02626	30	0	1	0	0	0	0	1	129	83	6.24	3.6	1.7	4.41	146	198	12.3	0.89	3.78	30	15.8		8	3	5	46.2	34	31	5.4	7.2	64	0	1	1	0	0	4	11.25	7.2	5	150	0.583	4
561	1	75	2017-04-20 09:58:32	2017-04-29 11:14:25	9.0527	60	1	1	1	0	0	0	0	147	83	5.45	3.74	1.21	4.5	141	194	12.6	0.94	2.98	32.1	17.8		13	3	10	43.9	10	20	8.2	7.2	67	1	0	1	1	1	4	10.7463	7.2	4	100	0.686	4
558	1	90	2016-05-04 16:39:17	2016-05-11 10:50:22	6.7577	30	1	0	0	1	0	0	2	158	53	6.66	4.8	1.1	3.49	104	168	14.9	1.21	3.04		15.6		6	3	3	26.2	5	13	3.6	7.2	87	1	1	1	0	0	4	8.27586	7.4	5	160	0.717	4
560	0	84	2017-10-19 15:49:33	2017-10-30 10:22:07	10.7726	90	0	0	0	0	0	0	1	143	58	6.59	3.85	1.85	3.54	112	161	13.7	1.06	3.62	32.1	15.2	3.45	9	4	5	37	19	22	5.1	7.2	83	1	0	1	1	1	4	8.6747	8.4	5	80	0.583	4
553	1	84	2017-10-20 14:20:09	2017-10-27 11:19:37	6.87463	7	1	0	0	0	0	0	0	152	77	5.42	3.23	1.45	3.69	114	233	12.7	0.96	4.65	37.3	16.7	0.66	9	4	5	29.8	7	17	6	7.2	87	1	0	1	0	0	4	8.27586	9.7	5	100	0.595	4
559	0	85	2015-06-09 17:36:32	2015-06-20 10:12:17	10.6915	15	0	0	0	0	0	0	1	164	71	7.97	4.9	2.2	3.94	114	187	14.1	1.08	3.77		15.9		13	3	10	37.8	9	20	4.1	7.2	70	1	0	1	0	0	4	10.2857	10	4	100	0.614	4
567	1	79	2016-04-22 14:59:45	2016-05-03 09:35:20	10.7747	7	1	0	0	1	0	0	1	152	101	6.97	4.73	1.64	4.92	144	256	12.8	0.97	4.08	39.5	16.8		9	5	4	36.1	20	21	5.5	7.3	72	1	1	1	0	0	4	10.1389	4.8	5	100	0.679	2
564	0	73	2018-03-09 17:17:59	2018-03-17 10:00:49	7.69641	2	1	0	0	0	0	0	1	166	78	3.69	1.75	1.55	3.95	114	196	12.3	0.93	3.45	36.7	18.5	0.86	9	4	5	31	10	17	6.3	7.3	55	1	1	1	0	0	4	13.2727	5.3	5	120	0.474	2
570	1	53	2017-05-14 12:20:19	2017-05-22 11:05:31	7.94806	60	1	1	0	0	0	0	2	171	108	8.42	6.28	1.59	4.8	148	141	14.4	1.11	2.02	32.4	17.1		8	3	5	38.1	19	19	8.8	7.3	72	1	1	1	1	1	4	10.1389	5.6	5	60	0.746	3
566	1	74	2016-09-14 20:07:02	2016-09-23 13:17:09	8.71536	30	0	0	0	0	0	0	2	172	106	6.79	4.16	1.87	4.24	133	163	13.2	0.98	3.38		17		8	3	5	34.7	11	15	5.8	7.3	67	1	0	1	0	0	4	10.8955	6.7	5	150	0.614	4
569	1	75	2014-12-25 17:00:39	2015-01-13 10:26:39	18.7264	2	1	0	0	1	1	0	2	132	75	7.33	5.8	1	3.68	127	259	13.5	1.03	3.85		14.7	1.49	12	9	3	36.9	2	42	5.3	7.3	72	0	0	1	0	0	4	10.1389	7	5	100	0.795	4
565	1	58	2017-07-26 15:12:07	2017-08-05 10:00:31	9.78361	30	1	0	1	1	1	0	0	121	102	5.88	3.63	1.83	4.71	144	263	13.1	1	4.42	35.4	17.1	1.07					38		11.2	7.3	68	1	0	1	0	0	4	10.7353	7.3	5	80	0.617	4
568	0	39	2015-10-12 11:45:44	2015-10-23 10:29:45	10.9472	7	1	0	0	0	0	0	0	154	83	6.68	4.33	1.67	4.54	131	162	14.2	1.09	2.88		14.6		23	7	16	43.7	9	14	4.4	7.3	57	1	0	1	0	1	4	12.807	7.3	5	100	0.649	4
563	1	78	2018-08-23 06:46:45	2018-09-03 10:20:34	11.1485	1	0	0	0	1	0	0	1	139	80	3.64	2.61	0.69	2.55	87	197	13.3	1.04	3.58	47.7	14.8	1.59	14	6	8	34.4	15	24	5.2	7.3	136	1	0	1	0	0	4	5.36765	7.4	5	100	0.716	4
577	1	54	2016-03-01 06:23:05	2016-03-11 10:32:25	10.1731	3	1	0	0	0	0	0	2	112	64	7.46	5.5	1.5	4.69	143	175	13.3	1.05	2.36	35.1	17.4		12	4	8	34.1	10	16	4.3	7.4	53	1	1	1	0	0	4	13.9623	6.6	5	80	0.736	4
571	1	91	2019-02-26 15:16:37	2019-03-13 10:23:54	14.7967	10	1	0	0	1	0	0	2	149	57	4.05	2.37	1.03	3.51	107	115	13.4	1.05	4.07		16.9	1.11	7	2	5	38	32	20	5.7	7.4	136	1	0	1	0	0	4	5.44118	7.4	5	100	0.585	4
573	1	74	2018-08-14 13:34:48	2018-08-27 13:56:22	13.015	3	1	1	1	0	0	0	0	137	75	9.55	7	1.67	4.15	130	269	14.2	1.13	4.46	43.5	15	0.72	10	5	5	33.4	11	23	3.8	7.4	72	1	1	1	0	0	4	10.2778	7.4	5	100	0.733	4
576	1	75	2016-12-19 10:12:24	2016-12-30 10:30:01	11.0122	20	0	1	1	0	0	0	0	149	67	7.03	4.26	2.07	4.31	137	153	13.6	1.04	3.37	38.2	14.5		12	4	8	36.5	13	15	4	7.4	58	1	0	1	0	0	4	12.7586	7.4	5	100	0.606	4
578	1	69	2015-05-10 10:24:28	2015-05-20 10:03:41	9.98557	10	1	0	1	0	0	0	1	117	66	5.74	3.16	1.85	4.39	133	269	12.8	0.94	4.02		15.6		9	3	6	39.5	14	18	5.1	7.4	99	0	0	1	0	0	4	7.47475	7.4	5	40	0.551	4
575	1	90	2017-10-08 14:31:07	2017-10-18 14:38:44	10.0053	7	0	0	0	1	0	0	2	161	88	5.48	4.09	0.94	4.5	162	138	13	0.99	3.59	34.6	18.2	12.07	26	12	14	31.5	18	29	5.3	7.4	104	1	0	1	0	0	4	7.11538	8.3	5	180	0.746	4
572	1	88	2018-11-26 11:49:07	2018-12-06 12:30:08	10.0285	4	1	0	0	0	0	0	0	144	91	7.98	5.56	1.59	4.47	140	249	13.5	1.06	3.27	39.5	15.1	0.54	18	6	12	33.4	9	18	6.7	7.4	99	1	0	1	0	1	4	7.47475	11.3	4	120	0.697	4
574	1	77	2018-02-26 22:22:55	2018-03-07 11:11:20	8.53362	1	1	0	0	0	0	0	2	130	75	9.39	7.4	1.11	3.97	115	251	13.1	1.01	6.21	37.9	16	0.95	5	2	3	32.1	15	25	5.1	7.4	73	1	1	1	0	0	4	10.137		5	110	0.788
579	1	80	2017-11-14 14:20:47	2017-11-29 13:38:46	14.9708	3	1	1	1	1	0	0	1	163	91	5.21	3.61	1	4.77	147	161	12.7	0.96	5.73	42	17.8	1.9	16	8	8	34.5	34	82	4.6	7.5	65	1	0	1	0	0	4	11.5385	7.5	4	100	0.692	4
582	1	85	2017-07-26 14:57:40	2017-08-05 10:19:53	9.80709	26	1	0	0	0	0	0	0	109	54	19.42	16.7	2.28	4.06	126	223	14.8	1.15	1.97	30	19	6.9	5	2	3	33.7	21	19	4.5	7.5	66	1	0	1	1	0	4	11.3636	7.5	5	80	0.828	4
580	1	56	2017-04-28 23:38:19	2017-05-08 09:34:15	9.41384	1	0	1	1	1	1	0	0	142	90	6.14	4.13	1.22	4.06	126	155	15.3	1.2	4.08	38.9	15.1		5	2	3	33.8	10	18	6.3	7.5	129	1	0	1	0	1	4	5.81395	8.2	5	100	0.672	4
583	0	67	2015-12-19 00:29:46	2016-01-01 11:18:01	13.4502	3	1	0	0	1	0	0	1	125	99	6.76	4.1	1.9	4.14	128	159	12.5	0.92	3.71	35.9	15.4		7	3	4	38.7	16	20	6.3	7.5	53	1	0	1	1	0	4	14.1509	8.7	5	100	0.609	4
581	1	83	2016-01-09 15:43:00	2016-01-28 10:15:10	18.7723	2	0	0	0	0	1	0	0	172	80	11.34	9.3	1.1	4.15	120	263	14.4	1.11	8.96	40.9	17.3		7	3	4	25.5	8	14	18.6	7.5	105	1	0	1	0	0	4	7.14286		5	80	0.821
590	0	86	2015-08-18 14:33:28	2015-08-28 12:02:48	9.89537	2	1	0	0	1	1	0	0	190	78	11.98	7.8	3.2	4.1	121	336	12.7	0.94	3.31	40.7	17.3	0.36	18	5	13	32.3	16	18	7.2	7.6	40	1	0	1	0	0	4	19	4.5	5	100	0.654	2
584	1	78	2019-02-25 18:44:50	2019-03-11 10:18:30	13.6484	10	1	0	0	1	1	0	2	134	84	7.56	5.03	1.6	4.31	134	260	13.6	1.07	4.37		14.6	1.57	10	4	6	32.2	10	16	5.7	7.6	97	1	0	1	0	1	4	7.83505	7.6	4	100	0.665	4
585	1	75	2017-12-21 22:05:44	2017-12-25 11:06:34	3.54225	15	1	1	1	0	0	0	0	137	87	5.59	3.61	1.43	4.11	125	123	13.6	1.06	3.83	39.4	16	1.06	9	4	5	32.4	16	18	5.1	7.6	87	0	1	1	0	0	4	8.73563	7.6	5	150	0.646	4
587	1	63	2017-09-06 13:34:01	2017-09-18 09:42:42	11.8394	60	1	1	1	0	0	0	0	128	71	5.26	2.87	1.75	3.79	114	128	12.6	0.95	3.16	34	16.9	1.75	7	3	4	38.4	19	18	6	7.6	123	1	0	1	0	0	4	6.17886	7.6	5	80	0.546	4
591	1	53	2018-08-09 20:07:43	2018-08-13 15:36:12	3.81145	3	1	1	0	0	0	0	0	135	82	7.08	5.74	0.96	4.94	152	255	11.9	0.9	4.61	33.5	15.5	0.25					21		8.5	7.6	80	1	0	1	1	0	4	9.5	7.6	5	150	0.811	4
592	1	64	2017-12-23 13:40:25	2018-01-02 11:45:55	9.92049	30	0	0	0	1	0	0	2	141	77	9.42	7.02	1.8	4.19	131	175	13.7	1.07	3.46	34.4	15.9	0.55	9	4	5	41.5	24	16	5.1	7.6	66	1	1	1	1	0	4	11.5152	7.6	5	170	0.745	4
588	1	89	2016-02-13 13:18:45	2016-02-23 10:23:06	9.87802	3	1	1	0	0	0	1	0	168	78	6.11	4.6	1	4.51	142	126	13.4	1.06	2.49	35	16.1	3.78	17	6	11	32.2	5	23	2	7.6	89	1	0	1	0	0	4	8.53933	7.9	4	100	0.76	4
589	1	88	2015-12-02 15:28:22	2015-12-14 10:47:30	11.805	14	1	0	0	0	0	0	2	138	78	6.36	3.7	1.8	4.55	137	181	12.7	0.94	4.05	39	17.2		12	4	8	34.3	7	16	6.2	7.6	78	1	0	1	0	0	4	9.74359	7.9	5	160	0.582	4
586	1	73	2017-09-11 15:27:11	2017-09-21 13:43:49	9.92822	5	0	1	1	0	0	0	2	168	96	9.69	8.02	0.76	4.31	119	117	13.4	1.03	5.33	34.6	15.6	4.31	12	7	5	23.6	17	38	4.4	7.6	58	1	0	1	0	0	4	13.1034	13.1	5	180	0.828	4
593	1	73	2019-03-21 14:29:15	2019-04-08 12:33:00	17.9193	4	0	0	0	0	1	1	0	134	84	8.56	6.05	1.72	4.47	140	114	13.4	1.05	3.41		17.2	0.56	7	3	4	35.2	15	13	18.4	7.7	61	1	0	1	0	0	4	12.623	2.4	5	80	0.707	1
596	1	60	2016-02-23 19:01:36	2016-03-03 09:59:14	8.62336	10	1	0	0	0	0	0	1	108	76	9.79	7.6	1.4	4.95	148	225	13.2	1.04	2.91	34.6	15.6	0.93	12	5	7	32.1	27	25	6.8	7.7	75	1	0	1	0	0	4	10.2667	5.9	5	100	0.776	3
595	1	79	2017-09-21 14:17:09	2017-10-02 12:55:41	10.9434	2	1	1	1	0	0	0	2	142	66	6.43	4.74	1.06	4.28	134	224	13.6	1.05	4.25	37.5	15.7	0.44	8	4	4	37.9	13	14	7.7	7.7	61	1	1	1	0	0	4	12.623	7.7	5	110	0.737	4
594	1	64	2019-01-15 09:16:30	2019-01-26 10:38:10	11.0567	15	0	1	1	0	0	0	2	125	79	8.89	4.9	2.72	3.66	121	290	13.4	1.02	4.21		16.5	0.21	9	4	5	27.7	11	24	4.4	7.7	77	1	0	1	0	0	4	10		5	130	0.553
601	0	82	2016-07-07 07:42:30	2016-07-27 13:13:45	20.23	1	1	0	0	1	0	0	1	177	77	7.97	6.7	0.7	4	123	309	14.4	1.12	5.12		15.8		12	4	8	35.7	16	18	5.4	7.8	43	1	1	1	0	1	4	18.1395	2.6	5	70	0.836	1
603	1	73	2015-11-25 19:53:14	2015-12-04 11:03:02	8.63181	7	1	0	1	0	0	0	1	134	82	6.82	4.5	1.4	4.08	129	164	12.8	0.95	2.49	28.6	15.9	2.24	10	4	6	40	89	54	6	7.8	78	1	1	1	1	0	4	10	4.8	5	80	0.666	2
597	1	80	2019-04-08 09:32:44	2019-04-15 10:50:09	7.05376	3	1	1	1	0	0	0	1	177	65	4.53	2.61	1.3	3.42	114	161	15.2	1.23	4.6		17.7	1.51	8	3	5	30.1	19	27	5.9	7.8	76	1	0	1	0	0	4	10.2632	7.4	5	100	0.577	4
598	1	83	2018-06-04 16:28:00	2018-06-10 13:29:20	5.87593	90	0	0	0	0	0	0	2	115	74	8.29	5.47	2.1	4.28	130	235	13	1.01	2.67	34.2	16.8	0.4	9	4	5	33.5	30	23	4	7.8	91	0	0	1	0	0	4	8.57143	7.8	5	170	0.661	4
600	1	73	2017-08-24 13:41:57	2017-08-27 12:32:10	2.95154	7	1	0	0	0	0	0	0	143	91	5.18	3.3	1.24	4.63	137	229	12.5	0.94	3.12	36.1	17.2	0.47	7	4	3	41.9	19	16	7.1	7.8	63	0	1	1	0	0	4	12.381	7.8	5	120	0.637	4
599	1	71	2017-09-16 09:43:32	2017-09-25 10:48:47	9.04531	4	1	0	0	0	0	0	1	128	80	10.66	9.53	0.66	4.53	126	218	12.3	0.92	3.41	31	14.7	0.41	6	2	4	34.8	9	12	4.3	7.8	61	1	0	1	0	1	4	12.7869	8.5	5	80	0.894	4
602	1	86	2017-12-26 09:42:37	2018-01-02 10:40:00	7.03985	4	0	0	0	1	0	0	0	121	77	6.26	4.19	1.32	3.82	114	174	13	1	4.29	56.5	15.8	0.55	13	5	8	34.7	14	25	5.4	7.8	47	1	0	1	1	0	4	16.5957	9.7	5	150	0.669	4
606	1	84	2016-05-14 14:02:15	2016-05-23 11:02:00	8.87483	30	0	1	1	0	0	0	1	173	72	5.61	4.1	1	4.29	131	142	14	1.08	2.73		17.1		10	4	6	34.2	12	26	4.4	7.9	114	1	0	1	0	0	4	6.92982	4.5	5	80	0.731	2
605	1	81	2016-08-31 22:29:59	2016-09-12 10:52:07	11.5154	4	1	0	0	1	1	0	0	184	82	4.96	2.8	1.4	3.84	118	149	12.9	0.95	2.59		18.3		6	3	3	37.3	14	19	9.7	7.9	115	1	1	1	0	0	4	6.86957	7.9	5	150	0.569	4
604	0	81	2018-03-12 18:23:43	2018-03-20 10:08:59	7.65644	10	1	0	0	0	0	1	0	140	64	8.41	5.87	1.81	3.62	110	316	13.2	1.02	6.15	33	15	0.65	13	5	8	34.4	18	31	6.4	7.9	93	1	0	1	0	0	4	8.49462	9	5	100	0.698	4
611	1	75	2017-07-22 15:44:35	2017-08-02 10:03:37	10.7632	1	0	1	1	1	0	0	1	120	76	6.5	4.85	1.07	4.67	143	112	14.3	1.12	3.08	36.3	16.8	0.35	16	7	9	36.9	5	16	5.4	8	59	1	0	1	1	1	4	13.5593	6.9	5	80	0.745	4
607	1	73	2018-01-09 23:45:38	2018-01-22 11:10:55	12.4759	1	1	1	0	0	0	0	1	128	71	10.33	8.17	1.56	3.86	116	232	14.7	1.16	4.81	39.4	16	5.26	30	16	14	27.8	17	26	6.7	8	56	1	0	1	0	0	4	14.2857	7.9	3	70	0.791	4
609	1	65	2016-10-12 11:23:55	2016-10-22 15:45:29	10.1816	5	0	1	1	0	0	0	1	138	71	5.74	3.98	1.33	4.7	140	141	13.9	1.07	3.23	31.5	16.3		13	5	8	37.1	16	16	4.9	8	74	0	0	1	0	0	4	10.8108	8	5	60	0.693	4
608	1	88	2017-02-10 14:14:48	2017-02-24 13:55:25	13.9865	7	1	0	0	1	0	0	2	151	70	11.04	8.8	1.1	3.14	96	336	15	1.16	7.82	47.9	16.1		14	8	6	25.3	49	42	4.2	8	53	1	0	1	0	1	4	15.0943	8.6	5	110	0.797	4
610	1	69	2015-09-26 22:11:32	2015-09-30 11:38:52	3.56065	1	1	1	1	0	0	0	1	145	96	12.4	8.6	2.8	4.39	147	223	12.3	0.9	3.43		15.9		15	5	10	39	22	20	5	8	84	1	0	1	0	0	4	9.52381		5	100	0.695
612	1	71	2014-12-23 11:51:20	2015-01-06 10:15:21	13.9333	30	1	0	0	0	0	0	0	148	77	4.11	1.78	1.8	3.96	138	235	11.9	0.87	3.25		16.6		8	3	5	35.5	14	16	5.2	8.2	86	0	0	1	0	0	4	9.53488	8.2	5	80	0.433	4
614	1	79	2016-08-13 20:11:02	2016-08-24 10:34:46	10.5998	10	1	0	1	1	0	0	0	150	67	8.04	5.5	1.7	4.78	145	166	16	1.26	3.61		15.9		23	11	12	37.7	19	24	3.5	8.3	66	0	0	1	0	1	4	12.5758	4.8	5	150	0.688	2
616	1	80	2017-03-16 10:15:34	2017-03-20 10:45:38	4.02088	9	1	1	0	0	0	0	2	161	94	7.53	5.5	1.28	2.88	100	269	13.7	1.05	2.54	34.1	16.1	2.3	16	8	8	30.1	11	17	6	8.3	102	1	1	1	1	1	4	8.13725	4.9	5	200	0.73	2
613	1	82	2018-08-29 20:08:34	2018-09-06 11:04:45	7.62235	1	0	1	1	0	0	0	1	131	80	5.79	3.85	1.47	3.44	102	188	14.6	1.14	3.89	43.7	15.2	1.66	6	3	3	31.7	3	13	4.5	8.3	124	0	0	1	0	1	4	6.69355	6.5	5	80	0.665	3
615	1	83	2018-07-12 13:00:47	2018-07-24 11:57:05	11.9558	15	1	0	1	0	0	0	0	131	73	6.62	4.53	1.46	4.22	134	157	13.3	1.03	2.89	35.3	16.8	1.31	12	6	6	40.7	13	15	5.4	8.3	67	1	1	1	1	0	4	12.3881	8.3	5	80	0.684	4
617	1	78	2018-11-05 17:16:18	2018-11-15 11:28:44	9.75863	7	1	0	1	0	0	0	2	116	90	5.75	3.79	1	4.47	136	244	14.1	1.09	3.07	37.1	16.1	1.03	6	3	3	34.1	11	19	4.6	8.4	79	1	0	1	0	0	4	10.6329	8.4	5	130	0.659	4
618	1	64	2018-07-08 14:10:27	2018-08-22 13:23:25	44.9673	30	1	1	0	1	1	0	1	144	83	8.37	6.32	1.45	3.33	97	223	13.8	1.09	7.65	45.8	16	0.67	5	2	3	30.8	10	20	11.8	8.5	154	1	0	1	0	0	4	5.51948	4.2	5	50	0.755	1
619	0	71	2018-06-25 10:27:31	2018-07-09 10:32:16	14.0033	7	1	0	1	1	0	0	0	179	94	5.39	3.79	1.2	3.27	112	273	13.5	1.06	3.82	32.2	16.3	0.69	10	3	7	37.7	10	17	5.6	8.5	52	1	1	1	0	0	4	16.3462	5.3	5	60	0.702	2
620	1	76	2017-03-25 14:05:05	2017-04-01 11:23:09	6.88755	5	1	0	1	1	1	1	0	118	76	4.21	2.41	1.36	4.56	146	176	13.3	1.01	4.14	36.1	16		8	4	4	41.6	29	26	5.3	8.5	64	1	0	1	0	0	4	13.2812	8.5	5	100	0.572	4
621	1	86	2016-08-26 15:09:57	2016-09-04 09:50:35	8.77822	5	0	0	0	0	0	0	2	146	59	4.77	3.6	0.8	3.76	89	161	13.2	0.98	2.91		16.2		9	4	5	34.2	11	24	7	8.5	72	1	1	1	0	0	4	11.8056	8.5	5	80	0.751	4
622	1	80	2016-06-22 18:15:12	2016-07-01 10:49:19	8.69036	3	0	0	0	0	0	0	2	171	90	7.43	5.2	1.6	4.44	133	160	12.8	0.97	4.1		16.3		13	6	7	30.7	9	17	4.9	8.5	72	1	1	1	0	0	4	11.8056	8.8	5	90	0.698	4
623	0	68	2017-03-30 15:44:54	2017-04-12 10:22:33	12.7761	3	0	0	0	1	1	0	1	162	70	2.43	1.92	0.3	2.96	69	87	15.1	1.18	3.76	40.8	17.3		6	3	3	27.4	7	13	10.1	8.6	61	1	0	1	0	1	4	14.0984	8.6	5	100	0.791	4
624	1	92	2015-04-01 18:33:15	2015-05-20 10:44:02	48.6742	3	1	1	1	1	0	0	2	158	96	7.07	5	1.3	3.65	107	257	14	1.06	4.36		14.8		10	4	6	29.6	13	24	5.2	8.6	94	0	0	1	0	0	4	9.14894	8.6	5	110	0.704	4
625	1	90	2015-01-04 16:40:08	2015-01-14 15:19:09	9.94376	90	1	0	1	0	0	0	2	153	73	9.36	6.2	1.7	3.57	117	361	16	1.28	4.77		15.1		10	4	6	38.5	8	17	4.6	8.6	74	0	0	1	0	0	4	11.6216	8.6	4	80	0.665	4
627	1	77	2019-03-04 18:27:39	2019-03-19 10:33:36	14.6708	1	1	0	0	1	0	0	0	89	49	10.2	6.02	3.03	4.98	155	243	12.8	0.99	5.21		15.9	0.33	7	3	4	37	20	29	5.8	8.8	85	1	1	1	1	0	4	10.3529	6.9	4	100	0.59	4
626	1	82	2018-04-30 08:30:30	2018-05-18 11:12:15	18.1123	3	0	0	1	1	0	1	0	165	99	5.14	3.17	0.82	3.45	106	186	13.2	1.02	4.46	40.4	15.5	1.91	6	3	3	36.7	7	16	7.7	8.8	111	1	1	1	0	1	4	7.92793	8.8	3	100	0.616	4
628	1	77	2017-03-13 16:50:29	2017-04-10 10:16:01	27.7261	1	1	1	1	0	0	0	1	141	87	7.5	5.69	1.08	4.54	140	235	14.3	1.11	4.76	30.1	15.7		21	8	13	39.2	21	27	5.9	8.9	72	1	0	1	0	0	4	12.3611	7.2	5	100	0.759	4
629	1	89	2019-02-14 19:41:57	2019-02-28 10:05:42	13.5998	10	1	1	0	1	1	1	1	166	73	7.05	4.71	1.59	3.9	126	141	14.1	1.12	4.01		16.5	1.23	7	4	3	36.5	23	45	13.3	9.1	102	1	0	1	0	0	4	8.92157	8.8	4	100	0.668	4
630	1	70	2019-01-22 21:49:57	2019-01-31 10:05:46	8.51098	1	0	1	1	0	0	0	2	129	77	10.06	8.41	0.8	4.29	130	207	12.9	1	5.22		14.2	1.34	5	2	3	28.9	9	27	5.2	9.1	48	1	0	1	0	0	4	18.9583	9.4	5	160	0.836	4
631	1	77	2016-03-14 14:03:29	2016-03-24 10:45:06	9.86223	7	0	1	0	0	0	0	1	97	55	7.55	4.5	2.1	4.48	135	240	13	1.02	4.52	40.3	14.9		7	3	4	33.6	22	19	5.1	9.2	78	1	0	1	1	0	4	11.7949	5.3	5	100	0.593	2
632	1	53	2019-04-23 10:57:09	2019-05-02 11:00:35	9.00238	7	1	1	1	0	0	0	0	109	63	6.15	3.71	1.83	4.07	130	195	12.9	1	3.08		15.2	0.28	12	5	7	32.9	7	14	4.7	9.3	78	1	1	1	0	0	4	11.9231	6.3	5	80	0.602	3
633	1	79	2016-08-27 14:57:33	2016-09-05 10:14:56	8.80374	1	1	0	0	0	0	0	1	141	74	6.82	4.4	1.8	4.09	120	182	14.1	1.07	16.7		16.7		15	5	10	33.4	19	43	4.9	9.4	108	1	1	1	0	1	4	8.7037	5.7	5	120	0.647	3
635	1	83	2017-07-03 11:44:32	2017-07-28 11:46:12	25.0012	4	1	0	0	1	0	0	1	154	62	7.65	5.79	1.08	4.05	123	231	13.3	1.01	4.69	40.8	15.4		18	7	11	40.4	28	29	5.3	9.4	74	1	0	1	1	1	4	12.7027	9.4	4	100	0.758	4
636	0	78	2015-07-02 15:41:36	2015-07-06 12:54:28	3.88394	60	1	0	0	0	0	0	1	158	85	7.55	4.8	2	3.66	101	174	12.9	0.96	3.74		17		9	3	6	36	11	18	6.8	9.4	65	0	1	1	1	0	4	14.4615	9.4	5	150	0.64	4
634	1	86	2016-04-26 19:12:19	2016-05-10 10:19:02	13.6297	7	1	0	0	0	0	0	0	178	95	6.59	4.1	1.2	3.25	100	111	14.8	1.16	3.77		15.1		5	2	3	34.9	10	18	3.9	9.4	136	0	0	1	0	0	4	6.91176	10.6	5	100	0.619	4
637	1	68	2019-01-13 17:12:53	2019-01-23 10:32:27	9.72192	20	1	0	1	0	0	0	0	121	71	7.34	5.7	1.19	4.4	139	252	13	1.01	4.43		14.6	0.3	9	3	6	38.1	8	13	5.3	9.5	80	1	0	1	0	1	4	11.875	4	5	100	0.777	1
638	1	80	2016-08-22 12:08:50	2016-09-05 10:18:59	13.9237	20	0	1	0	0	0	0	2	146	71	4.84	3.05	1.11	4.21	134	170	15	1.18	2.82		16.3		5	2	3	35.5	14	16	4.5	9.5	75	1	0	1	0	0	4	12.6667	9.5	5	160	0.631	4
639	1	72	2019-04-03 11:14:26	2019-04-10 18:33:57	7.30522	5	0	0	0	1	0	0	2	150	81	6.87	4.69	1.33	3.96	125	175	14.5	1.16	4.78		16.3	1.82	12	5	7	34.7	43	52	6.4	9.6	91	1	1	1	0	0	4	10.5495	9.6	5	60	0.683	4
640	1	75	2017-09-15 19:12:23	2017-09-22 11:43:18	6.68814	5	1	0	1	0	0	0	2	134	74	11.49	10.68	0.48	4.5	131	248	13	0.99	4.26	31.6	14.7	1.17	18	7	11	37.3	11	16	10.4	9.7	61	1	0	1	0	1	4	15.9016	2.5	5	100	0.929	1
641	1	80	2017-02-03 14:19:36	2017-02-17 11:23:33	13.8777	5	1	0	0	1	0	1	1	127	84	3.66	2.15	0.95	3.31	103	200	13.7	1.05	3.76	35.2	18		6	3	3	36.7	25	26	5.2	9.8	134	0	1	1	0	0	4	7.31343	9.8	5	150	0.587	4
642	1	73	2016-06-07 10:42:06	2016-06-20 12:05:03	13.0576	20	1	1	1	0	0	0	2	116	68	13.18	11.9	0.9	4.7	147	212	13.1	0.99	4.18		16		22	7	15	40.1	15	20	4.9	9.8	82	1	0	1	0	0	4	11.9512	9.8	5	200	0.904	4
643	1	71	2015-01-30 14:00:52	2015-02-04 10:01:45	4.83395	60	1	1	1	0	0	0	0	126	84	4.81	2.5	1.5	4.09	131	108	14.5	1.13	2.11		17.4		18	6	12	37.7	14	24	4.4	9.8	71	0	1	1	0	0	4	13.8028	9.8	5	100	0.522	4
644	1	81	2018-03-09 17:21:29	2018-03-26 10:19:30	16.707	5	0	1	0	1	0	0	1	157	91	11.28	8.61	1.4	4.43	130	352	12.9	0.99	5.63	36	16.6	0.88	5	4	1	29.2	18	20	7.7	10	181	1	0	1	0	0	4	5.52486	10.6	4	100	0.763	4
645	1	83	2015-04-01 14:56:52	2015-04-13 10:14:37	11.804	7	0	1	0	1	0	0	1	152	91	5.1	3.23	0.84	4.43	114	181	13.7	1.03	3.32		14.5		7	3	4	43.6	8	27	5.2	10.1	68	0	0	1	0	0	4	14.8529	10.1	5	100	0.633	4
646	1	82	2016-12-26 11:27:38	2017-01-11 14:19:25	16.1193	60	1	0	0	1	1	1	0	115	87	6.26	4.38	1.3	3.88	129	175	15.1	1.19	4.16	33.9	17	0.8	10	5	5	37.1	112	71	4.1	10.2	167	1	0	1	0	0	4	6.10778	15.4	4	100	0.699	4
647	0	81	2015-03-27 23:18:47	2015-04-25 10:23:06	28.4613	20	1	0	0	1	1	0	2	124	82	13.2	11	0.9	4.19	128	113	15.1	1.16	5.06		14.9	6.78	17	7	10	32.2	17	31	10.2	10.5	57	0	0	1	0	0	4	18.4211	3.9	4	120	0.842	1
649	0	66	2015-12-25 04:28:46	2016-01-13 11:21:44	19.2868	1	0	0	0	0	0	0	0	118	63	4.01	2.4	1.1	1.96	72	66	16	1.27	2.41	39.5	18.8	2.12	32	21	11	25	22	47	5.4	10.6	125	0	1	1	1	0	4	8.48	9.4	5	80	0.609	4
648	1	90	2019-02-16 15:58:14	2019-03-05 11:24:16	16.8097	7	0	0	0	0	0	0	2	123	76	7.86	5.72	0.98	3.52	106	175	13.5	1.06	3.94		15.6	1.36	9	4	5	31.7	31	35	5.4	10.6	108	1	0	1	0	0	4	9.81481	10.6	4	180	0.728	4
650	1	76	2016-01-01 00:50:00	2016-01-08 11:01:24	7.42458	10	0	0	0	1	0	0	1	156	81	5.27	4.2	0.8	3.87	118	178	14.4	1.11	4.15	38.2	16.9		5	3	2	34.6	11	17	4.2	10.7	181	1	0	1	1	0	4	5.9116	8.1	5	100	0.791	4
651	1	80	2015-10-29 17:58:27	2015-11-10 10:31:06	11.6893	4	1	1	1	1	0	0	0	144	68	12.57	11	1.1	3.03	84	283	15.2	1.19	5.57	37.7	14.9		5	2	3	25	35	33	7.1	10.8	181	1	1	1	0	0	4	5.96685	10.4	4	100	0.872	4
652	0	81	2019-02-03 11:50:54	2019-02-12 14:04:21	9.09267	10	0	0	0	1	0	0	2	169	106	8.88	5.76	2.57	3.78	112	325	14.1	1.12	4.21	38.7	15.1	2.01	10	5	5	29.7	6	13	5.9	11	55	1	0	1	0	0	4	20		5	160	0.649
653	1	87	2015-04-15 11:10:25	2015-05-06 09:48:18	20.943	10	1	0	0	1	1	0	2	133	60	7.33	4.94	1.63	3.59	115	186	14	1.06	6.29		16.5		8	3	5	32.5	16	17	11.4	11.2	99	0	0	1	1	1	4	11.3131	16.6	5	100	0.674	4
